# Supplementary material
Source: publisher site journal article supplement (https://www.dovepress.com/get_supplementary_file.php?f=521068.docx)
Supplement: Supplementary file 1 [file get_supplementary_file.php]

Supplementary Material

Supplementary Figures：


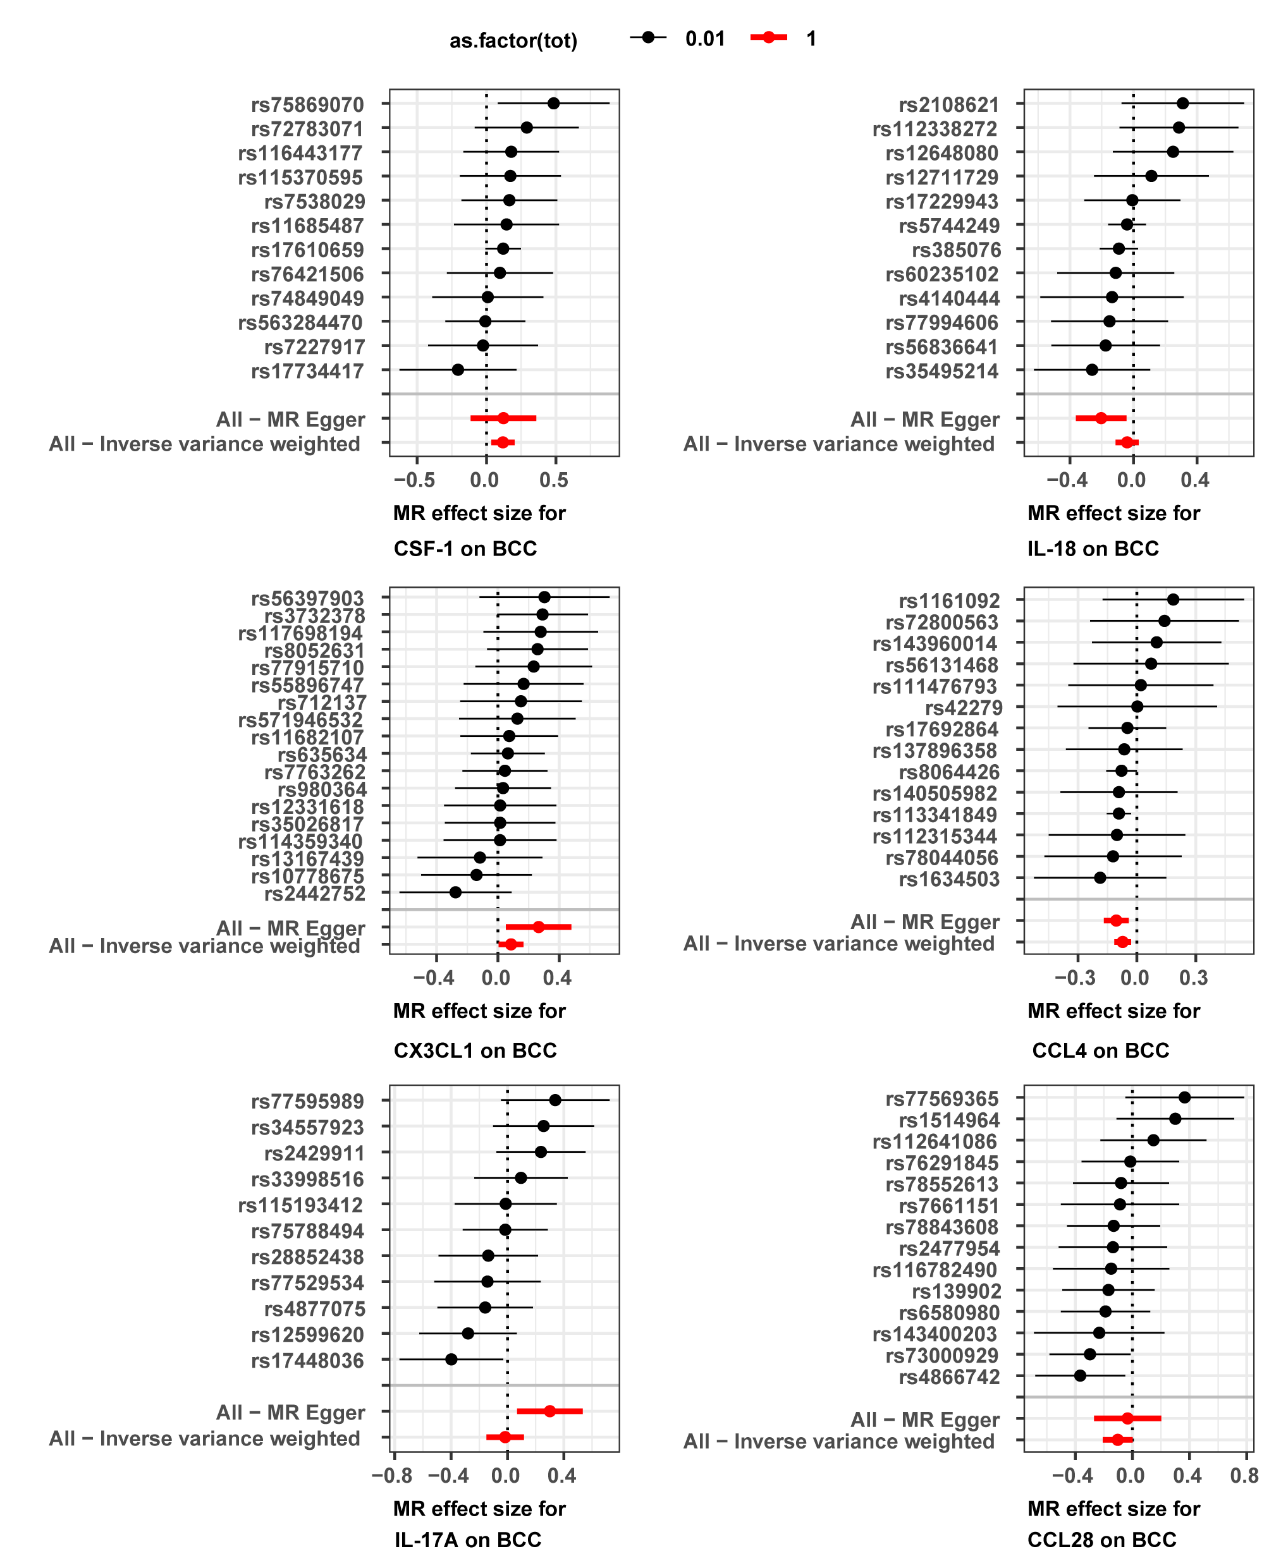


Figure S1. The forest plot of the casual relationship between circulating proteins and BCC. Abbreviations: MR: Mendelian randomization, BCC: Basal cell carcinoma, CCL4: C-C motif chemokine 4, CCL28: C-C motif chemokine 28, IL- 17A: Interleukin-17A, IL-18: Interleukin-18, CX3CL1: Fractalkine, CSF-1: Macrophage colony-stimulating factor-1.


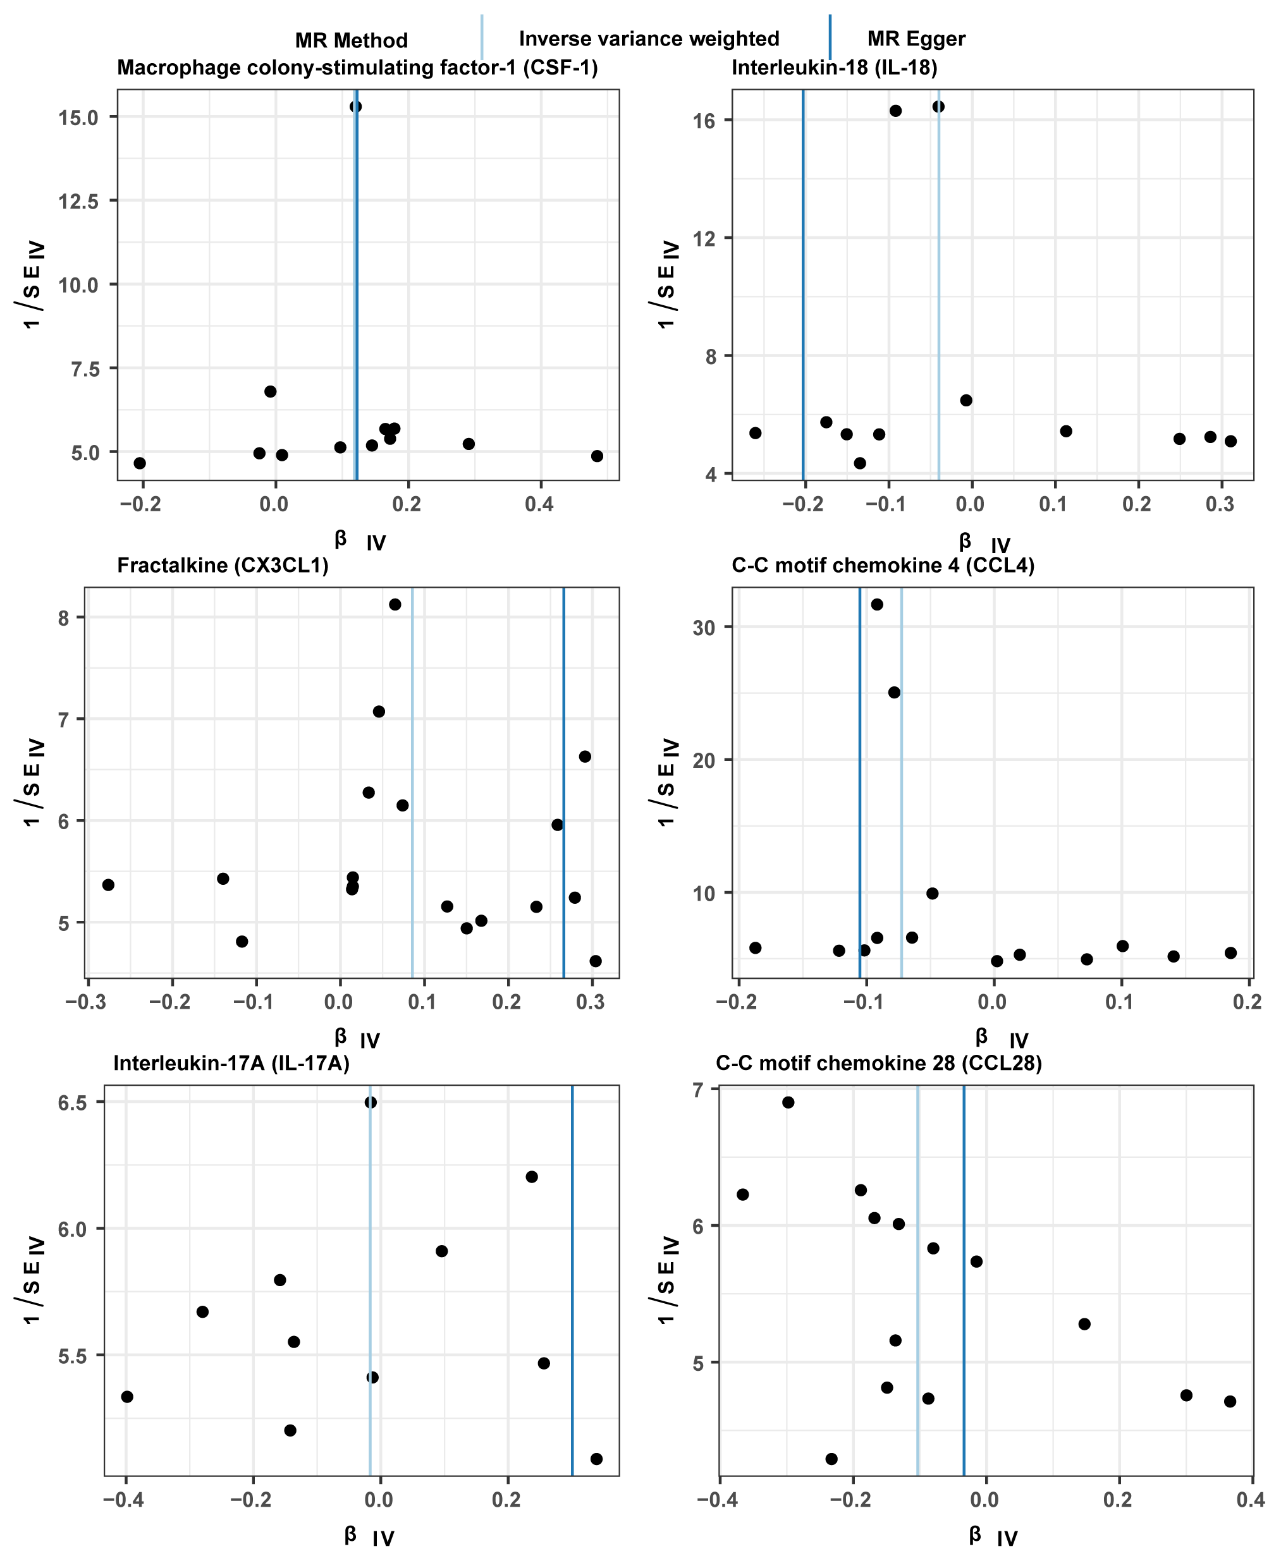


Figure S2. The funnel plot of the casual relationship between circulating proteins and BCC. Abbreviations: MR: Mendelian randomization, BCC: Basal cell carcinoma, CCL4: C-C motif chemokine 4, CCL28: C-C motif chemokine 28, IL- 17A: Interleukin-17A, IL-18: Interleukin-18, CX3CL1: Fractalkine, CSF-1: Macrophage colony-stimulating factor-1.

Supplementary Tables：

| **Table S1 Instrumental variables used in MR analysis of the association between Circulating Inflammatory Proteins and BCC.** | | | | | | | | | | |
| --- | --- | --- | --- | --- | --- | --- | --- | --- | --- | --- |
| **exposure** | **SNP** | **effect_allele** | **other_allele** | **F** | **exposure** | | | **outcome** | | |
| **beta** | **se** | **pval** | **beta** | **se** | **pval** |
| Adenosine Deaminase levels | rs10024178 | T | C | 21.61 | -0.093 | 0.020 | 3.35E-06 | -0.002 | 0.018 | 0.930 |
| Adenosine Deaminase levels | rs111478357 | T | C | 21.58 | 0.204 | 0.044 | 3.39E-06 | 0.024 | 0.037 | 0.500 |
| Adenosine Deaminase levels | rs111555146 | C | G | 1182.53 | -0.860 | 0.025 | 1.00E-200 | -0.010 | 0.026 | 0.710 |
| Adenosine Deaminase levels | rs115657851 | A | G | 22.51 | 0.139 | 0.029 | 2.10E-06 | -0.003 | 0.028 | 0.930 |
| Adenosine Deaminase levels | rs1608554 | A | G | 24.03 | 0.060 | 0.012 | 9.50E-07 | 0.025 | 0.011 | 0.027 |
| Adenosine Deaminase levels | rs2527856 | T | C | 21.22 | 0.056 | 0.012 | 4.09E-06 | -0.017 | 0.011 | 0.140 |
| Adenosine Deaminase levels | rs2620728 | C | G | 21.44 | -0.055 | 0.012 | 3.65E-06 | 0.032 | 0.011 | 0.003 |
| Adenosine Deaminase levels | rs541944924 | T | C | 21.84 | 0.167 | 0.036 | 2.97E-06 | 0.013 | 0.032 | 0.690 |
| Adenosine Deaminase levels | rs62319741 | T | C | 24.65 | 0.128 | 0.026 | 6.87E-07 | -0.019 | 0.024 | 0.430 |
| Adenosine Deaminase levels | rs7292320 | A | G | 20.91 | -0.060 | 0.013 | 4.82E-06 | -0.020 | 0.012 | 0.100 |
| Adenosine Deaminase levels | rs80212763 | T | C | 467.54 | 0.969 | 0.045 | 1.10E-103 | -0.020 | 0.042 | 0.630 |
| Artemin levels | rs118115625 | T | C | 22.13 | 0.170 | 0.036 | 2.55E-06 | 0.039 | 0.028 | 0.170 |
| Artemin levels | rs1329733 | A | G | 24.56 | -0.067 | 0.014 | 7.20E-07 | 0.028 | 0.011 | 0.011 |
| Artemin levels | rs13303278 | A | C | 21.26 | -0.066 | 0.014 | 4.01E-06 | 0.006 | 0.011 | 0.570 |
| Artemin levels | rs1370215 | T | C | 20.93 | -0.070 | 0.015 | 4.76E-06 | -0.016 | 0.013 | 0.210 |
| Artemin levels | rs138311590 | A | G | 21.23 | -0.081 | 0.018 | 4.07E-06 | 0.022 | 0.015 | 0.140 |
| Artemin levels | rs142585779 | T | C | 23.73 | 0.212 | 0.044 | 1.11E-06 | -0.036 | 0.034 | 0.290 |
| Artemin levels | rs148226005 | A | G | 21.93 | 0.211 | 0.045 | 2.83E-06 | -0.022 | 0.041 | 0.590 |
| Artemin levels | rs17340161 | A | G | 21.34 | -0.087 | 0.019 | 3.86E-06 | 0.010 | 0.015 | 0.490 |
| Artemin levels | rs3003450 | T | G | 21.28 | 0.063 | 0.014 | 3.97E-06 | -0.015 | 0.011 | 0.200 |
| Artemin levels | rs4993886 | A | T | 23.78 | -0.079 | 0.016 | 1.08E-06 | -0.009 | 0.012 | 0.440 |
| Artemin levels | rs55885546 | A | G | 21.64 | -0.205 | 0.044 | 3.28E-06 | -0.010 | 0.037 | 0.800 |
| Artemin levels | rs62277657 | A | G | 25.18 | 0.083 | 0.017 | 5.22E-07 | -0.004 | 0.013 | 0.760 |
| Artemin levels | rs6509909 | C | G | 25.06 | -0.088 | 0.018 | 5.57E-07 | 0.011 | 0.014 | 0.430 |
| Artemin levels | rs77502336 | C | G | 23.19 | 0.068 | 0.014 | 1.47E-06 | -0.018 | 0.012 | 0.130 |
| Artemin levels | rs9496445 | T | C | 22.21 | 0.085 | 0.018 | 2.44E-06 | -0.012 | 0.015 | 0.440 |
| Artemin levels | rs9684768 | C | G | 24.43 | 0.069 | 0.014 | 7.70E-07 | -0.007 | 0.011 | 0.520 |
| Axin-1 levels | rs115455827 | A | G | 22.51 | 0.145 | 0.031 | 2.09E-06 | -0.034 | 0.027 | 0.210 |
| Axin-1 levels | rs148317708 | A | G | 25.48 | -0.212 | 0.042 | 4.47E-07 | 0.009 | 0.031 | 0.770 |
| Axin-1 levels | rs2470622 | A | G | 25.79 | -0.123 | 0.024 | 3.80E-07 | -0.003 | 0.020 | 0.870 |
| Axin-1 levels | rs2691530 | T | C | 25.38 | -0.067 | 0.013 | 4.71E-07 | 0.012 | 0.011 | 0.300 |
| Axin-1 levels | rs2712427 | A | G | 21.82 | 0.063 | 0.013 | 2.99E-06 | 0.001 | 0.011 | 0.890 |
| Axin-1 levels | rs7171268 | T | C | 22.31 | 0.155 | 0.033 | 2.32E-06 | -0.031 | 0.028 | 0.270 |
| beta-nerve growth factor levels | rs12188775 | T | G | 24.12 | 0.121 | 0.025 | 9.06E-07 | -0.018 | 0.026 | 0.500 |
| beta-nerve growth factor levels | rs12259196 | A | G | 25.68 | -0.075 | 0.015 | 4.03E-07 | -0.014 | 0.014 | 0.300 |
| beta-nerve growth factor levels | rs12533747 | A | G | 25.33 | 0.139 | 0.028 | 4.84E-07 | -0.048 | 0.030 | 0.110 |
| beta-nerve growth factor levels | rs12539643 | C | G | 20.94 | 0.187 | 0.041 | 4.74E-06 | -0.019 | 0.032 | 0.560 |
| beta-nerve growth factor levels | rs13058191 | C | G | 21.47 | -0.216 | 0.047 | 3.59E-06 | -0.001 | 0.051 | 0.980 |
| beta-nerve growth factor levels | rs140072192 | A | G | 21.22 | 0.277 | 0.060 | 4.10E-06 | 0.012 | 0.047 | 0.810 |
| beta-nerve growth factor levels | rs17647697 | A | C | 21.10 | -0.162 | 0.035 | 4.35E-06 | 0.049 | 0.038 | 0.200 |
| beta-nerve growth factor levels | rs17689534 | A | G | 22.84 | 0.221 | 0.046 | 1.76E-06 | 0.041 | 0.046 | 0.380 |
| beta-nerve growth factor levels | rs1878359 | A | G | 24.68 | 0.063 | 0.013 | 6.76E-07 | -0.024 | 0.012 | 0.057 |
| beta-nerve growth factor levels | rs34559191 | T | C | 23.96 | 0.061 | 0.012 | 9.82E-07 | -0.010 | 0.012 | 0.420 |
| beta-nerve growth factor levels | rs397081 | T | C | 21.08 | 0.120 | 0.026 | 4.40E-06 | 0.035 | 0.028 | 0.210 |
| beta-nerve growth factor levels | rs4017 | T | C | 21.17 | -0.119 | 0.026 | 4.21E-06 | -0.043 | 0.024 | 0.073 |
| beta-nerve growth factor levels | rs4899264 | C | G | 22.10 | -0.055 | 0.012 | 2.59E-06 | 0.007 | 0.011 | 0.500 |
| beta-nerve growth factor levels | rs62092633 | T | C | 23.26 | -0.125 | 0.026 | 1.42E-06 | 0.036 | 0.024 | 0.140 |
| beta-nerve growth factor levels | rs62494116 | T | C | 24.41 | 0.058 | 0.012 | 7.81E-07 | -0.003 | 0.012 | 0.810 |
| beta-nerve growth factor levels | rs6328 | A | C | 42.68 | -0.080 | 0.012 | 6.46E-11 | -0.013 | 0.012 | 0.260 |
| beta-nerve growth factor levels | rs72673086 | A | G | 21.48 | 0.058 | 0.013 | 3.57E-06 | 0.002 | 0.012 | 0.870 |
| beta-nerve growth factor levels | rs77493302 | T | C | 21.26 | 0.085 | 0.019 | 4.01E-06 | 0.039 | 0.019 | 0.035 |
| beta-nerve growth factor levels | rs9479501 | T | G | 21.08 | 0.063 | 0.014 | 4.41E-06 | -0.030 | 0.013 | 0.023 |
| Caspase 8 levels | rs1032417 | C | G | 27.04 | -0.086 | 0.017 | 1.99E-07 | -0.004 | 0.015 | 0.770 |
| Caspase 8 levels | rs111764025 | C | G | 21.17 | 0.110 | 0.024 | 4.21E-06 | -0.003 | 0.022 | 0.880 |
| Caspase 8 levels | rs11695193 | A | T | 24.75 | -0.081 | 0.016 | 6.51E-07 | -0.002 | 0.015 | 0.920 |
| Caspase 8 levels | rs11709039 | T | C | 21.61 | 0.078 | 0.017 | 3.34E-06 | 0.024 | 0.016 | 0.140 |
| Caspase 8 levels | rs12073499 | A | C | 23.64 | -0.081 | 0.017 | 1.16E-06 | -0.009 | 0.016 | 0.590 |
| Caspase 8 levels | rs137887001 | C | G | 22.75 | 0.232 | 0.049 | 1.85E-06 | 0.035 | 0.042 | 0.410 |
| Caspase 8 levels | rs187405204 | T | C | 21.16 | 0.420 | 0.091 | 4.23E-06 | -0.075 | 0.049 | 0.130 |
| Caspase 8 levels | rs34154371 | T | C | 22.82 | -0.202 | 0.042 | 1.78E-06 | 0.007 | 0.041 | 0.860 |
| Caspase 8 levels | rs56328050 | C | G | 131.92 | -0.199 | 0.017 | 1.56E-30 | -0.002 | 0.016 | 0.920 |
| Caspase 8 levels | rs73306603 | T | C | 24.61 | 0.204 | 0.041 | 7.01E-07 | 0.054 | 0.039 | 0.160 |
| Caspase 8 levels | rs78449258 | A | G | 21.86 | -0.200 | 0.043 | 2.94E-06 | 0.054 | 0.036 | 0.140 |
| C-C motif chemokine 19 levels | rs10242459 | A | G | 22.41 | 0.073 | 0.015 | 2.20E-06 | -0.008 | 0.014 | 0.580 |
| C-C motif chemokine 19 levels | rs10496135 | C | G | 23.36 | 0.186 | 0.038 | 1.34E-06 | 0.029 | 0.038 | 0.440 |
| C-C motif chemokine 19 levels | rs11574915 | A | C | 74.16 | -0.146 | 0.017 | 7.19E-18 | 0.001 | 0.017 | 0.950 |
| C-C motif chemokine 19 levels | rs13010492 | C | G | 42.62 | -0.080 | 0.012 | 6.65E-11 | 0.087 | 0.011 | 0.000 |
| C-C motif chemokine 19 levels | rs1415763 | C | G | 23.25 | 0.076 | 0.016 | 1.42E-06 | -0.014 | 0.015 | 0.360 |
| C-C motif chemokine 19 levels | rs28635588 | A | G | 74.24 | -0.178 | 0.021 | 6.90E-18 | 0.005 | 0.015 | 0.760 |
| C-C motif chemokine 19 levels | rs34791102 | A | G | 21.82 | 0.124 | 0.027 | 2.99E-06 | -0.023 | 0.023 | 0.320 |
| C-C motif chemokine 19 levels | rs3792790 | A | C | 21.08 | 0.055 | 0.012 | 4.40E-06 | 0.003 | 0.011 | 0.810 |
| C-C motif chemokine 19 levels | rs4554017 | T | C | 23.87 | 0.060 | 0.012 | 1.03E-06 | 0.000 | 0.011 | 0.990 |
| C-C motif chemokine 19 levels | rs4766578 | A | T | 36.82 | -0.080 | 0.013 | 1.29E-09 | 0.039 | 0.011 | 0.000 |
| C-C motif chemokine 19 levels | rs4907572 | A | G | 23.99 | -0.067 | 0.014 | 9.69E-07 | 0.008 | 0.012 | 0.520 |
| C-C motif chemokine 19 levels | rs62292952 | T | G | 160.81 | 0.235 | 0.019 | 7.53E-37 | -0.025 | 0.017 | 0.150 |
| C-C motif chemokine 19 levels | rs6486995 | A | T | 26.66 | -0.070 | 0.014 | 2.43E-07 | 0.024 | 0.013 | 0.064 |
| C-C motif chemokine 19 levels | rs6870560 | T | C | 26.08 | 0.086 | 0.017 | 3.28E-07 | -0.007 | 0.016 | 0.630 |
| C-C motif chemokine 19 levels | rs74764632 | A | T | 21.05 | 0.135 | 0.029 | 4.47E-06 | -0.016 | 0.026 | 0.540 |
| C-C motif chemokine 19 levels | rs7595241 | C | G | 22.38 | 0.062 | 0.013 | 2.24E-06 | 0.015 | 0.012 | 0.230 |
| C-C motif chemokine 19 levels | rs79086127 | T | C | 21.69 | -0.210 | 0.045 | 3.20E-06 | -0.028 | 0.042 | 0.500 |
| C-C motif chemokine 19 levels | rs9469127 | C | G | 310.88 | -0.488 | 0.028 | 1.41E-69 | 0.004 | 0.035 | 0.920 |
| C-C motif chemokine 20 levels | rs10207134 | T | C | 60.55 | -0.100 | 0.013 | 7.18E-15 | -0.007 | 0.012 | 0.530 |
| C-C motif chemokine 20 levels | rs10837780 | T | C | 20.98 | 0.119 | 0.026 | 4.63E-06 | -0.031 | 0.023 | 0.180 |
| C-C motif chemokine 20 levels | rs111674022 | T | C | 20.99 | -0.095 | 0.021 | 4.61E-06 | 0.011 | 0.020 | 0.580 |
| C-C motif chemokine 20 levels | rs1129474 | T | C | 22.80 | 0.057 | 0.012 | 1.80E-06 | 0.006 | 0.011 | 0.560 |
| C-C motif chemokine 20 levels | rs11582772 | T | C | 22.25 | 0.259 | 0.055 | 2.39E-06 | -0.046 | 0.051 | 0.370 |
| C-C motif chemokine 20 levels | rs117753190 | C | G | 26.56 | -0.185 | 0.036 | 2.56E-07 | -0.005 | 0.030 | 0.860 |
| C-C motif chemokine 20 levels | rs117900576 | C | G | 27.65 | -0.226 | 0.043 | 1.45E-07 | 0.001 | 0.030 | 0.980 |
| C-C motif chemokine 20 levels | rs13049624 | A | G | 22.70 | -0.132 | 0.028 | 1.89E-06 | -0.027 | 0.024 | 0.260 |
| C-C motif chemokine 20 levels | rs151092565 | T | C | 21.25 | -0.151 | 0.033 | 4.03E-06 | 0.021 | 0.032 | 0.500 |
| C-C motif chemokine 20 levels | rs2796032 | T | C | 25.08 | 0.064 | 0.013 | 5.50E-07 | -0.013 | 0.012 | 0.270 |
| C-C motif chemokine 20 levels | rs35833676 | T | C | 23.46 | 0.080 | 0.017 | 1.28E-06 | 0.028 | 0.015 | 0.070 |
| C-C motif chemokine 20 levels | rs41302923 | A | G | 21.94 | 0.194 | 0.041 | 2.82E-06 | -0.030 | 0.034 | 0.380 |
| C-C motif chemokine 20 levels | rs4981022 | A | G | 24.61 | 0.064 | 0.013 | 7.02E-07 | 0.019 | 0.012 | 0.120 |
| C-C motif chemokine 20 levels | rs5769672 | T | G | 21.22 | -0.118 | 0.026 | 4.09E-06 | 0.028 | 0.025 | 0.260 |
| C-C motif chemokine 20 levels | rs6420556 | T | C | 21.70 | -0.074 | 0.016 | 3.19E-06 | 0.011 | 0.015 | 0.450 |
| C-C motif chemokine 20 levels | rs6498926 | A | T | 21.13 | 0.062 | 0.013 | 4.29E-06 | 0.004 | 0.012 | 0.760 |
| C-C motif chemokine 20 levels | rs73072893 | A | G | 23.76 | 0.206 | 0.042 | 1.09E-06 | 0.036 | 0.037 | 0.320 |
| C-C motif chemokine 20 levels | rs742493 | T | C | 62.20 | 0.146 | 0.019 | 3.11E-15 | -0.009 | 0.017 | 0.610 |
| C-C motif chemokine 20 levels | rs9274623 | T | G | 26.37 | -0.076 | 0.015 | 2.82E-07 | -0.008 | 0.013 | 0.510 |
| C-C motif chemokine 23 levels | rs1001495 | T | C | 20.90 | 0.098 | 0.022 | 4.83E-06 | 0.014 | 0.020 | 0.470 |
| C-C motif chemokine 23 levels | rs11017721 | A | G | 27.25 | 0.097 | 0.019 | 1.79E-07 | 0.007 | 0.017 | 0.670 |
| C-C motif chemokine 23 levels | rs112492 | A | G | 24.43 | -0.069 | 0.014 | 7.70E-07 | 0.010 | 0.012 | 0.410 |
| C-C motif chemokine 23 levels | rs113959305 | T | C | 24.03 | -0.140 | 0.029 | 9.50E-07 | -0.003 | 0.024 | 0.900 |
| C-C motif chemokine 23 levels | rs117639761 | A | C | 61.77 | -0.325 | 0.041 | 3.85E-15 | -0.033 | 0.039 | 0.400 |
| C-C motif chemokine 23 levels | rs12204524 | C | G | 24.12 | 0.116 | 0.024 | 9.04E-07 | 0.003 | 0.020 | 0.870 |
| C-C motif chemokine 23 levels | rs12949647 | A | G | 22.03 | -0.064 | 0.014 | 2.69E-06 | 0.007 | 0.012 | 0.570 |
| C-C motif chemokine 23 levels | rs143910182 | T | C | 23.08 | 0.216 | 0.045 | 1.56E-06 | -0.135 | 0.054 | 0.012 |
| C-C motif chemokine 23 levels | rs146074782 | A | G | 23.91 | -0.306 | 0.063 | 1.01E-06 | -0.041 | 0.054 | 0.440 |
| C-C motif chemokine 23 levels | rs17735284 | A | T | 21.06 | 0.093 | 0.020 | 4.45E-06 | 0.013 | 0.019 | 0.470 |
| C-C motif chemokine 23 levels | rs1926742 | A | G | 21.09 | 0.057 | 0.013 | 4.39E-06 | 0.010 | 0.012 | 0.410 |
| C-C motif chemokine 23 levels | rs2870238 | T | C | 25.35 | 0.057 | 0.011 | 4.78E-07 | 0.000 | 0.011 | 0.960 |
| C-C motif chemokine 23 levels | rs4317138 | T | C | 21.22 | 0.059 | 0.013 | 4.10E-06 | -0.036 | 0.012 | 0.002 |
| C-C motif chemokine 23 levels | rs438811 | T | C | 23.50 | 0.067 | 0.014 | 1.25E-06 | -0.001 | 0.013 | 0.930 |
| C-C motif chemokine 23 levels | rs4719850 | T | C | 21.57 | -0.055 | 0.012 | 3.42E-06 | -0.014 | 0.011 | 0.220 |
| C-C motif chemokine 23 levels | rs712048 | A | C | 1061.19 | -0.515 | 0.016 | 1.00E-200 | 0.025 | 0.016 | 0.120 |
| C-C motif chemokine 23 levels | rs73071153 | A | G | 22.02 | -0.150 | 0.032 | 2.70E-06 | 0.011 | 0.031 | 0.720 |
| C-C motif chemokine 23 levels | rs73114426 | A | G | 20.97 | 0.095 | 0.021 | 4.66E-06 | -0.012 | 0.020 | 0.560 |
| C-C motif chemokine 23 levels | rs74491711 | A | G | 20.97 | 0.127 | 0.028 | 4.67E-06 | -0.015 | 0.028 | 0.590 |
| C-C motif chemokine 23 levels | rs77083410 | C | G | 28.99 | 0.224 | 0.042 | 7.26E-08 | -0.029 | 0.052 | 0.570 |
| C-C motif chemokine 23 levels | rs77354000 | A | G | 22.31 | -0.206 | 0.044 | 2.32E-06 | -0.056 | 0.037 | 0.120 |
| C-C motif chemokine 23 levels | rs77527696 | T | C | 29.79 | -0.254 | 0.047 | 4.81E-08 | -0.044 | 0.052 | 0.390 |
| C-C motif chemokine 25 levels | rs10401186 | A | G | 50.19 | 0.126 | 0.018 | 1.40E-12 | -0.009 | 0.016 | 0.600 |
| C-C motif chemokine 25 levels | rs10426282 | T | G | 37.31 | -0.073 | 0.012 | 1.01E-09 | 0.011 | 0.011 | 0.300 |
| C-C motif chemokine 25 levels | rs10792444 | T | C | 22.84 | -0.087 | 0.018 | 1.76E-06 | 0.025 | 0.019 | 0.170 |
| C-C motif chemokine 25 levels | rs11028036 | A | G | 21.78 | 0.055 | 0.012 | 3.06E-06 | -0.014 | 0.011 | 0.220 |
| C-C motif chemokine 25 levels | rs111437511 | T | C | 23.41 | 0.144 | 0.030 | 1.31E-06 | -0.017 | 0.026 | 0.520 |
| C-C motif chemokine 25 levels | rs11589432 | C | G | 22.62 | 0.057 | 0.012 | 1.97E-06 | -0.010 | 0.011 | 0.360 |
| C-C motif chemokine 25 levels | rs12114935 | A | G | 29.33 | 0.077 | 0.014 | 6.11E-08 | 0.011 | 0.013 | 0.400 |
| C-C motif chemokine 25 levels | rs12606983 | T | C | 25.22 | -0.067 | 0.013 | 5.10E-07 | 0.009 | 0.013 | 0.460 |
| C-C motif chemokine 25 levels | rs143132666 | A | C | 22.69 | -0.193 | 0.041 | 1.90E-06 | 0.007 | 0.039 | 0.860 |
| C-C motif chemokine 25 levels | rs147851492 | A | G | 22.44 | 0.213 | 0.045 | 2.17E-06 | 0.002 | 0.038 | 0.960 |
| C-C motif chemokine 25 levels | rs149395110 | T | C | 20.87 | -0.278 | 0.061 | 4.92E-06 | -0.028 | 0.053 | 0.590 |
| C-C motif chemokine 25 levels | rs1705699 | T | C | 22.15 | -0.055 | 0.012 | 2.52E-06 | -0.005 | 0.011 | 0.620 |
| C-C motif chemokine 25 levels | rs516316 | C | G | 827.32 | -0.328 | 0.011 | 6.20E-182 | -0.028 | 0.011 | 0.009 |
| C-C motif chemokine 25 levels | rs521795 | T | C | 26.16 | -0.062 | 0.012 | 3.14E-07 | 0.001 | 0.011 | 0.910 |
| C-C motif chemokine 25 levels | rs62124688 | A | G | 2740.70 | -0.759 | 0.015 | 1.00E-200 | -0.024 | 0.015 | 0.098 |
| C-C motif chemokine 25 levels | rs62126084 | A | T | 129.46 | -0.178 | 0.016 | 5.37E-30 | 0.014 | 0.015 | 0.330 |
| C-C motif chemokine 25 levels | rs635634 | T | C | 223.56 | -0.248 | 0.017 | 1.52E-50 | -0.007 | 0.014 | 0.600 |
| C-C motif chemokine 25 levels | rs636479 | A | G | 21.21 | 0.055 | 0.012 | 4.12E-06 | -0.003 | 0.011 | 0.800 |
| C-C motif chemokine 25 levels | rs7137942 | A | G | 22.94 | -0.064 | 0.013 | 1.67E-06 | 0.004 | 0.011 | 0.750 |
| C-C motif chemokine 25 levels | rs7296588 | A | G | 99.83 | -0.116 | 0.012 | 1.66E-23 | -0.009 | 0.011 | 0.430 |
| C-C motif chemokine 25 levels | rs7611785 | A | G | 22.59 | 0.094 | 0.020 | 2.01E-06 | 0.010 | 0.022 | 0.650 |
| C-C motif chemokine 25 levels | rs7806274 | T | C | 21.99 | -0.076 | 0.016 | 2.74E-06 | 0.031 | 0.015 | 0.039 |
| C-C motif chemokine 25 levels | rs79990760 | A | G | 21.03 | 0.219 | 0.048 | 4.52E-06 | -0.006 | 0.047 | 0.900 |
| C-C motif chemokine 25 levels | rs851850 | A | G | 22.72 | -0.078 | 0.016 | 1.87E-06 | -0.012 | 0.016 | 0.450 |
| C-C motif chemokine 28 levels | rs112641086 | T | C | 28.44 | -0.106 | 0.020 | 9.64E-08 | -0.016 | 0.020 | 0.440 |
| C-C motif chemokine 28 levels | rs116782490 | A | C | 22.17 | 0.230 | 0.049 | 2.49E-06 | -0.034 | 0.048 | 0.470 |
| C-C motif chemokine 28 levels | rs139902 | A | C | 31.96 | 0.068 | 0.012 | 1.58E-08 | -0.012 | 0.011 | 0.310 |
| C-C motif chemokine 28 levels | rs143400203 | T | C | 21.37 | 0.181 | 0.039 | 3.79E-06 | -0.042 | 0.042 | 0.320 |
| C-C motif chemokine 28 levels | rs1514964 | T | C | 22.89 | -0.126 | 0.026 | 1.72E-06 | -0.038 | 0.027 | 0.150 |
| C-C motif chemokine 28 levels | rs2477954 | T | C | 23.36 | -0.058 | 0.012 | 1.34E-06 | 0.008 | 0.011 | 0.480 |
| C-C motif chemokine 28 levels | rs2866626 | C | G | 24.34 | -0.060 | 0.012 | 8.06E-07 | 0.025 | 0.012 | 0.029 |
| C-C motif chemokine 28 levels | rs291084 | C | G | 33.04 | 0.064 | 0.011 | 9.04E-09 | -0.007 | 0.011 | 0.520 |
| C-C motif chemokine 28 levels | rs4866742 | T | C | 33.11 | 0.070 | 0.012 | 8.71E-09 | -0.026 | 0.011 | 0.023 |
| C-C motif chemokine 28 levels | rs55843637 | C | G | 21.28 | 0.055 | 0.012 | 3.96E-06 | 0.009 | 0.011 | 0.440 |
| C-C motif chemokine 28 levels | rs6580980 | A | G | 33.99 | -0.069 | 0.012 | 5.53E-09 | 0.013 | 0.011 | 0.240 |
| C-C motif chemokine 28 levels | rs71363004 | C | G | 21.90 | 0.218 | 0.047 | 2.87E-06 | -0.004 | 0.034 | 0.910 |
| C-C motif chemokine 28 levels | rs73000929 | A | G | 29.71 | -0.194 | 0.036 | 5.02E-08 | 0.058 | 0.028 | 0.040 |
| C-C motif chemokine 28 levels | rs76291845 | A | G | 24.74 | 0.270 | 0.054 | 6.55E-07 | -0.004 | 0.047 | 0.930 |
| C-C motif chemokine 28 levels | rs7661151 | T | C | 20.95 | 0.053 | 0.012 | 4.70E-06 | -0.005 | 0.011 | 0.680 |
| C-C motif chemokine 28 levels | rs77569365 | T | G | 20.93 | 0.129 | 0.028 | 4.77E-06 | 0.047 | 0.027 | 0.085 |
| C-C motif chemokine 28 levels | rs78552613 | T | C | 21.79 | -0.184 | 0.040 | 3.04E-06 | 0.015 | 0.032 | 0.640 |
| C-C motif chemokine 28 levels | rs78843608 | A | G | 27.18 | -0.168 | 0.032 | 1.85E-07 | 0.022 | 0.028 | 0.430 |
| C-C motif chemokine 4 levels | rs10990301 | A | T | 20.88 | 0.085 | 0.019 | 4.88E-06 | 0.001 | 0.018 | 0.980 |
| C-C motif chemokine 4 levels | rs111476793 | A | G | 20.92 | 0.087 | 0.019 | 4.79E-06 | 0.002 | 0.016 | 0.920 |
| C-C motif chemokine 4 levels | rs112315344 | T | G | 21.77 | 0.212 | 0.046 | 3.07E-06 | -0.022 | 0.038 | 0.570 |
| C-C motif chemokine 4 levels | rs113341849 | A | G | 943.22 | 0.565 | 0.018 | 1.00E-200 | -0.052 | 0.018 | 0.004 |
| C-C motif chemokine 4 levels | rs1161092 | A | G | 25.81 | -0.064 | 0.013 | 3.77E-07 | -0.012 | 0.012 | 0.310 |
| C-C motif chemokine 4 levels | rs116309267 | C | G | 23.33 | 0.196 | 0.041 | 1.37E-06 | -0.028 | 0.032 | 0.370 |
| C-C motif chemokine 4 levels | rs137896358 | T | C | 25.77 | 0.280 | 0.055 | 3.85E-07 | -0.018 | 0.042 | 0.670 |
| C-C motif chemokine 4 levels | rs140505982 | T | C | 30.56 | -0.229 | 0.042 | 3.24E-08 | 0.021 | 0.035 | 0.550 |
| C-C motif chemokine 4 levels | rs143960014 | A | G | 22.04 | 0.195 | 0.042 | 2.67E-06 | 0.020 | 0.033 | 0.550 |
| C-C motif chemokine 4 levels | rs1634503 | A | G | 29.14 | -0.075 | 0.014 | 6.72E-08 | 0.014 | 0.013 | 0.280 |
| C-C motif chemokine 4 levels | rs17692864 | T | C | 67.26 | 0.232 | 0.028 | 2.38E-16 | -0.011 | 0.023 | 0.630 |
| C-C motif chemokine 4 levels | rs42279 | T | C | 21.04 | 0.074 | 0.016 | 4.51E-06 | 0.000 | 0.015 | 0.990 |
| C-C motif chemokine 4 levels | rs56131468 | A | G | 21.90 | 0.083 | 0.018 | 2.87E-06 | 0.006 | 0.017 | 0.720 |
| C-C motif chemokine 4 levels | rs72800563 | T | G | 22.27 | -0.177 | 0.037 | 2.37E-06 | -0.025 | 0.034 | 0.470 |
| C-C motif chemokine 4 levels | rs78044056 | A | G | 22.31 | -0.261 | 0.055 | 2.33E-06 | 0.032 | 0.047 | 0.500 |
| C-C motif chemokine 4 levels | rs8064426 | A | G | 562.76 | -0.410 | 0.017 | 2.11E-124 | 0.032 | 0.016 | 0.050 |
| CD40L receptor levels | rs117191103 | T | C | 66.10 | 0.355 | 0.044 | 4.28E-16 | 0.019 | 0.038 | 0.610 |
| CD40L receptor levels | rs12152184 | A | G | 28.01 | 0.109 | 0.021 | 1.21E-07 | 0.005 | 0.018 | 0.800 |
| CD40L receptor levels | rs138739860 | T | G | 21.62 | 0.163 | 0.035 | 3.33E-06 | -0.047 | 0.030 | 0.120 |
| CD40L receptor levels | rs138897138 | A | G | 25.47 | 0.109 | 0.022 | 4.50E-07 | -0.005 | 0.019 | 0.790 |
| CD40L receptor levels | rs141401004 | C | G | 26.34 | -0.066 | 0.013 | 2.87E-07 | 0.006 | 0.011 | 0.570 |
| CD40L receptor levels | rs3967170 | A | G | 21.54 | 0.079 | 0.017 | 3.46E-06 | -0.011 | 0.017 | 0.530 |
| CD40L receptor levels | rs404842 | A | G | 23.72 | -0.060 | 0.012 | 1.12E-06 | -0.011 | 0.012 | 0.360 |
| CD40L receptor levels | rs4278412 | C | G | 22.94 | 0.198 | 0.041 | 1.67E-06 | -0.073 | 0.039 | 0.065 |
| CD40L receptor levels | rs6032663 | T | G | 1278.35 | -0.451 | 0.013 | 1.00E-200 | -0.002 | 0.013 | 0.870 |
| CD40L receptor levels | rs7250371 | T | C | 34.97 | 0.069 | 0.012 | 3.34E-09 | 0.014 | 0.011 | 0.210 |
| CD40L receptor levels | rs73128569 | A | T | 44.51 | -0.179 | 0.027 | 2.53E-11 | -0.010 | 0.027 | 0.700 |
| CD40L receptor levels | rs75626299 | C | G | 21.29 | 0.146 | 0.032 | 3.95E-06 | -0.012 | 0.030 | 0.700 |
| CD40L receptor levels | rs8024256 | A | G | 21.57 | -0.056 | 0.012 | 3.41E-06 | 0.028 | 0.012 | 0.021 |
| CD40L receptor levels | rs9526031 | A | C | 28.44 | 0.064 | 0.012 | 9.64E-08 | -0.007 | 0.011 | 0.510 |
| CUB domain-containing protein 1 levels | rs10044847 | C | G | 25.06 | -0.078 | 0.016 | 5.55E-07 | 0.007 | 0.016 | 0.680 |
| CUB domain-containing protein 1 levels | rs10964983 | C | G | 29.20 | -0.062 | 0.011 | 6.53E-08 | -0.006 | 0.011 | 0.600 |
| CUB domain-containing protein 1 levels | rs111476793 | A | G | 24.18 | 0.090 | 0.018 | 8.76E-07 | 0.002 | 0.016 | 0.920 |
| CUB domain-containing protein 1 levels | rs118116993 | A | T | 23.60 | 0.096 | 0.020 | 1.19E-06 | -0.039 | 0.020 | 0.048 |
| CUB domain-containing protein 1 levels | rs12290068 | A | G | 100.16 | 0.122 | 0.012 | 1.40E-23 | 0.008 | 0.012 | 0.480 |
| CUB domain-containing protein 1 levels | rs12928188 | A | T | 24.11 | -0.066 | 0.013 | 9.09E-07 | 0.018 | 0.013 | 0.180 |
| CUB domain-containing protein 1 levels | rs17078000 | A | G | 22.64 | 0.061 | 0.013 | 1.96E-06 | 0.002 | 0.012 | 0.860 |
| CUB domain-containing protein 1 levels | rs2276862 | C | G | 430.70 | 0.303 | 0.015 | 1.14E-95 | 0.000 | 0.014 | 0.980 |
| CUB domain-containing protein 1 levels | rs28535751 | T | C | 21.02 | -0.054 | 0.012 | 4.55E-06 | -0.012 | 0.011 | 0.290 |
| CUB domain-containing protein 1 levels | rs2990246 | C | G | 22.25 | -0.057 | 0.012 | 2.40E-06 | 0.003 | 0.011 | 0.790 |
| CUB domain-containing protein 1 levels | rs35478654 | T | C | 22.50 | -0.148 | 0.031 | 2.10E-06 | 0.016 | 0.030 | 0.580 |
| CUB domain-containing protein 1 levels | rs4804148 | T | C | 24.52 | -0.062 | 0.013 | 7.35E-07 | -0.015 | 0.012 | 0.240 |
| CUB domain-containing protein 1 levels | rs573808300 | A | G | 25.05 | -0.300 | 0.060 | 5.59E-07 | 0.016 | 0.046 | 0.730 |
| CUB domain-containing protein 1 levels | rs59872649 | A | G | 22.20 | -0.109 | 0.023 | 2.46E-06 | 0.019 | 0.023 | 0.420 |
| CUB domain-containing protein 1 levels | rs61782461 | T | C | 21.34 | -0.218 | 0.047 | 3.84E-06 | 0.051 | 0.041 | 0.210 |
| CUB domain-containing protein 1 levels | rs6452820 | A | G | 21.54 | -0.074 | 0.016 | 3.46E-06 | 0.021 | 0.016 | 0.170 |
| CUB domain-containing protein 1 levels | rs672806 | A | G | 49.48 | 0.082 | 0.012 | 2.00E-12 | 0.011 | 0.011 | 0.340 |
| CUB domain-containing protein 1 levels | rs6991332 | T | C | 23.67 | -0.058 | 0.012 | 1.14E-06 | -0.009 | 0.011 | 0.420 |
| CUB domain-containing protein 1 levels | rs74811341 | T | C | 22.81 | -0.132 | 0.028 | 1.79E-06 | -0.076 | 0.026 | 0.004 |
| CUB domain-containing protein 1 levels | rs7506429 | A | C | 26.19 | 0.074 | 0.014 | 3.09E-07 | 0.019 | 0.013 | 0.150 |
| CUB domain-containing protein 1 levels | rs7618923 | T | C | 132.48 | -0.174 | 0.015 | 1.18E-30 | 0.016 | 0.014 | 0.270 |
| C-X-C motif chemokine 1 levels | rs10734292 | A | G | 21.22 | 0.123 | 0.027 | 4.09E-06 | -0.014 | 0.023 | 0.540 |
| C-X-C motif chemokine 1 levels | rs11880837 | A | G | 21.07 | 0.058 | 0.013 | 4.42E-06 | -0.012 | 0.012 | 0.320 |
| C-X-C motif chemokine 1 levels | rs12770839 | A | C | 26.45 | 0.065 | 0.013 | 2.71E-07 | 0.021 | 0.012 | 0.074 |
| C-X-C motif chemokine 1 levels | rs1366946 | T | C | 547.00 | -0.313 | 0.013 | 5.65E-121 | -0.021 | 0.013 | 0.120 |
| C-X-C motif chemokine 1 levels | rs2122155 | A | G | 21.14 | -0.054 | 0.012 | 4.26E-06 | 0.010 | 0.011 | 0.360 |
| C-X-C motif chemokine 1 levels | rs2280441 | A | G | 21.39 | -0.144 | 0.031 | 3.75E-06 | 0.051 | 0.033 | 0.130 |
| C-X-C motif chemokine 1 levels | rs2835916 | C | G | 22.09 | -0.056 | 0.012 | 2.60E-06 | 0.001 | 0.011 | 0.930 |
| C-X-C motif chemokine 1 levels | rs62311721 | T | C | 20.89 | -0.186 | 0.041 | 4.88E-06 | 0.071 | 0.048 | 0.140 |
| C-X-C motif chemokine 1 levels | rs863004 | T | C | 30.85 | 0.066 | 0.012 | 2.78E-08 | -0.007 | 0.011 | 0.550 |
| C-X-C motif chemokine 10 levels | rs10481754 | T | C | 21.21 | -0.055 | 0.012 | 4.12E-06 | 0.012 | 0.011 | 0.280 |
| C-X-C motif chemokine 10 levels | rs1077965 | A | G | 21.41 | -0.055 | 0.012 | 3.71E-06 | -0.011 | 0.011 | 0.300 |
| C-X-C motif chemokine 10 levels | rs112202639 | A | G | 22.93 | -0.161 | 0.034 | 1.68E-06 | 0.009 | 0.036 | 0.800 |
| C-X-C motif chemokine 10 levels | rs115140093 | T | C | 152.46 | -0.519 | 0.042 | 5.02E-35 | -0.015 | 0.038 | 0.700 |
| C-X-C motif chemokine 10 levels | rs12155428 | T | C | 22.15 | -0.177 | 0.038 | 2.52E-06 | 0.005 | 0.031 | 0.860 |
| C-X-C motif chemokine 10 levels | rs12174864 | A | G | 23.14 | -0.058 | 0.012 | 1.51E-06 | 0.019 | 0.011 | 0.097 |
| C-X-C motif chemokine 10 levels | rs12476448 | T | C | 21.72 | 0.054 | 0.012 | 3.15E-06 | -0.010 | 0.011 | 0.340 |
| C-X-C motif chemokine 10 levels | rs12629593 | T | G | 23.33 | -0.088 | 0.018 | 1.37E-06 | 0.028 | 0.018 | 0.110 |
| C-X-C motif chemokine 10 levels | rs12646113 | T | C | 51.61 | 0.098 | 0.014 | 6.78E-13 | -0.010 | 0.013 | 0.450 |
| C-X-C motif chemokine 10 levels | rs150519056 | T | C | 23.97 | -0.184 | 0.038 | 9.77E-07 | -0.018 | 0.042 | 0.670 |
| C-X-C motif chemokine 10 levels | rs1563171 | A | G | 21.73 | 0.059 | 0.013 | 3.14E-06 | 0.001 | 0.012 | 0.940 |
| C-X-C motif chemokine 10 levels | rs2523495 | T | C | 31.21 | 0.110 | 0.020 | 2.31E-08 | 0.019 | 0.015 | 0.220 |
| C-X-C motif chemokine 10 levels | rs3184504 | T | C | 75.46 | 0.114 | 0.013 | 3.72E-18 | -0.038 | 0.011 | 0.001 |
| C-X-C motif chemokine 10 levels | rs4367871 | T | C | 22.70 | -0.057 | 0.012 | 1.89E-06 | 0.012 | 0.011 | 0.300 |
| C-X-C motif chemokine 10 levels | rs4804148 | T | C | 23.41 | -0.063 | 0.013 | 1.31E-06 | -0.015 | 0.012 | 0.240 |
| C-X-C motif chemokine 10 levels | rs55732300 | A | G | 22.09 | 0.118 | 0.025 | 2.60E-06 | -0.035 | 0.021 | 0.093 |
| C-X-C motif chemokine 10 levels | rs72651343 | T | C | 96.99 | -0.610 | 0.062 | 6.98E-23 | 0.020 | 0.051 | 0.690 |
| C-X-C motif chemokine 10 levels | rs72682331 | A | G | 27.15 | 0.109 | 0.021 | 1.88E-07 | 0.060 | 0.019 | 0.002 |
| C-X-C motif chemokine 10 levels | rs741344 | A | G | 21.30 | -0.060 | 0.013 | 3.92E-06 | 0.001 | 0.012 | 0.930 |
| C-X-C motif chemokine 10 levels | rs74956615 | A | T | 21.34 | -0.136 | 0.029 | 3.86E-06 | 0.028 | 0.024 | 0.250 |
| C-X-C motif chemokine 11 levels | rs10733789 | T | C | 41.18 | -0.082 | 0.013 | 1.39E-10 | -0.018 | 0.012 | 0.130 |
| C-X-C motif chemokine 11 levels | rs10898158 | A | G | 25.33 | 0.061 | 0.012 | 4.83E-07 | 0.004 | 0.011 | 0.690 |
| C-X-C motif chemokine 11 levels | rs111787182 | A | C | 21.18 | -0.145 | 0.031 | 4.19E-06 | 0.034 | 0.028 | 0.220 |
| C-X-C motif chemokine 11 levels | rs112884138 | T | C | 21.81 | -0.098 | 0.021 | 3.01E-06 | 0.021 | 0.018 | 0.250 |
| C-X-C motif chemokine 11 levels | rs116470923 | T | C | 21.39 | -0.198 | 0.043 | 3.74E-06 | -0.014 | 0.035 | 0.690 |
| C-X-C motif chemokine 11 levels | rs12433317 | A | G | 22.64 | 0.057 | 0.012 | 1.95E-06 | 0.003 | 0.011 | 0.790 |
| C-X-C motif chemokine 11 levels | rs2245786 | A | G | 20.91 | -0.060 | 0.013 | 4.82E-06 | 0.002 | 0.011 | 0.830 |
| C-X-C motif chemokine 11 levels | rs3184504 | T | C | 87.68 | 0.124 | 0.013 | 7.70E-21 | -0.038 | 0.011 | 0.001 |
| C-X-C motif chemokine 11 levels | rs4748380 | T | C | 22.49 | 0.090 | 0.019 | 2.12E-06 | 0.020 | 0.018 | 0.250 |
| C-X-C motif chemokine 11 levels | rs59148364 | A | G | 23.21 | 0.182 | 0.038 | 1.45E-06 | -0.020 | 0.036 | 0.580 |
| C-X-C motif chemokine 11 levels | rs60141220 | A | G | 22.18 | -0.078 | 0.017 | 2.49E-06 | 0.013 | 0.014 | 0.350 |
| C-X-C motif chemokine 11 levels | rs62291421 | C | G | 26.65 | 0.267 | 0.052 | 2.44E-07 | -0.058 | 0.050 | 0.250 |
| C-X-C motif chemokine 11 levels | rs6827617 | A | G | 213.46 | -0.172 | 0.012 | 2.42E-48 | -0.020 | 0.011 | 0.078 |
| C-X-C motif chemokine 11 levels | rs7009937 | T | C | 22.09 | 0.118 | 0.025 | 2.60E-06 | -0.004 | 0.021 | 0.850 |
| C-X-C motif chemokine 11 levels | rs7222922 | T | C | 23.49 | -0.088 | 0.018 | 1.26E-06 | 0.031 | 0.017 | 0.074 |
| C-X-C motif chemokine 11 levels | rs72747175 | A | G | 22.17 | 0.154 | 0.033 | 2.49E-06 | 0.026 | 0.031 | 0.400 |
| C-X-C motif chemokine 11 levels | rs72925566 | A | G | 27.66 | -0.097 | 0.019 | 1.44E-07 | 0.012 | 0.015 | 0.420 |
| C-X-C motif chemokine 11 levels | rs7475335 | A | C | 27.14 | -0.065 | 0.012 | 1.89E-07 | 0.004 | 0.011 | 0.730 |
| C-X-C motif chemokine 11 levels | rs7750544 | T | C | 22.22 | -0.077 | 0.016 | 2.44E-06 | -0.012 | 0.015 | 0.410 |
| C-X-C motif chemokine 11 levels | rs78632565 | T | C | 25.56 | 0.108 | 0.021 | 4.28E-07 | 0.040 | 0.022 | 0.074 |
| C-X-C motif chemokine 5 levels | rs10403201 | A | G | 22.39 | -0.060 | 0.013 | 2.22E-06 | 0.011 | 0.012 | 0.350 |
| C-X-C motif chemokine 5 levels | rs10760022 | A | C | 26.17 | -0.062 | 0.012 | 3.13E-07 | 0.004 | 0.011 | 0.750 |
| C-X-C motif chemokine 5 levels | rs10821552 | A | C | 52.66 | -0.113 | 0.016 | 3.97E-13 | -0.025 | 0.012 | 0.031 |
| C-X-C motif chemokine 5 levels | rs11734099 | A | G | 25.26 | 0.077 | 0.015 | 5.00E-07 | -0.035 | 0.014 | 0.015 |
| C-X-C motif chemokine 5 levels | rs146553494 | A | G | 23.92 | 0.184 | 0.038 | 1.00E-06 | 0.047 | 0.034 | 0.170 |
| C-X-C motif chemokine 5 levels | rs2004100 | T | C | 21.08 | 0.068 | 0.015 | 4.39E-06 | 0.027 | 0.013 | 0.040 |
| C-X-C motif chemokine 5 levels | rs2647400 | C | G | 23.56 | 0.063 | 0.013 | 1.21E-06 | -0.010 | 0.012 | 0.420 |
| C-X-C motif chemokine 5 levels | rs425535 | T | C | 782.45 | 0.506 | 0.018 | 3.52E-172 | -0.007 | 0.017 | 0.680 |
| C-X-C motif chemokine 5 levels | rs4279906 | T | C | 24.57 | 0.208 | 0.042 | 7.15E-07 | -0.073 | 0.039 | 0.064 |
| C-X-C motif chemokine 5 levels | rs59312158 | A | G | 24.35 | -0.190 | 0.039 | 8.01E-07 | -0.084 | 0.042 | 0.045 |
| C-X-C motif chemokine 5 levels | rs6993770 | A | T | 61.42 | -0.106 | 0.014 | 4.61E-15 | -0.006 | 0.012 | 0.610 |
| C-X-C motif chemokine 5 levels | rs7090111 | C | G | 219.65 | -0.173 | 0.012 | 1.08E-49 | -0.009 | 0.011 | 0.400 |
| C-X-C motif chemokine 5 levels | rs7636889 | A | G | 31.43 | -0.077 | 0.014 | 2.07E-08 | 0.025 | 0.013 | 0.054 |
| C-X-C motif chemokine 5 levels | rs79649467 | T | G | 38.88 | -0.172 | 0.028 | 4.50E-10 | -0.029 | 0.027 | 0.280 |
| C-X-C motif chemokine 6 levels | rs117109857 | C | G | 20.89 | 0.190 | 0.042 | 4.85E-06 | -0.014 | 0.035 | 0.700 |
| C-X-C motif chemokine 6 levels | rs12075 | A | G | 50.35 | 0.082 | 0.012 | 1.29E-12 | -0.007 | 0.011 | 0.520 |
| C-X-C motif chemokine 6 levels | rs12503139 | A | T | 961.53 | -0.363 | 0.012 | 1.00E-200 | 0.004 | 0.011 | 0.720 |
| C-X-C motif chemokine 6 levels | rs2886969 | T | C | 62.70 | -0.107 | 0.014 | 2.40E-15 | -0.013 | 0.013 | 0.330 |
| C-X-C motif chemokine 6 levels | rs3184504 | T | C | 26.87 | 0.068 | 0.013 | 2.18E-07 | -0.038 | 0.011 | 0.001 |
| C-X-C motif chemokine 6 levels | rs34080302 | T | G | 21.33 | 0.061 | 0.013 | 3.87E-06 | 0.001 | 0.012 | 0.900 |
| C-X-C motif chemokine 6 levels | rs35096759 | T | C | 24.39 | 0.211 | 0.043 | 7.85E-07 | 0.003 | 0.033 | 0.930 |
| C-X-C motif chemokine 6 levels | rs4951518 | T | G | 22.13 | -0.215 | 0.046 | 2.54E-06 | 0.073 | 0.039 | 0.065 |
| C-X-C motif chemokine 6 levels | rs79640485 | T | C | 23.92 | -0.225 | 0.046 | 1.00E-06 | -0.046 | 0.043 | 0.290 |
| C-X-C motif chemokine 6 levels | rs9371716 | T | C | 22.67 | -0.092 | 0.019 | 1.92E-06 | 0.008 | 0.016 | 0.620 |
| C-X-C motif chemokine 9 levels | rs114033894 | T | G | 21.16 | -0.225 | 0.049 | 4.22E-06 | 0.055 | 0.044 | 0.220 |
| C-X-C motif chemokine 9 levels | rs12191307 | A | G | 54.33 | -0.145 | 0.020 | 1.70E-13 | -0.017 | 0.018 | 0.330 |
| C-X-C motif chemokine 9 levels | rs142119726 | T | C | 24.10 | 0.271 | 0.055 | 9.14E-07 | 0.008 | 0.054 | 0.880 |
| C-X-C motif chemokine 9 levels | rs145607633 | T | C | 22.35 | 0.073 | 0.015 | 2.28E-06 | -0.003 | 0.015 | 0.810 |
| C-X-C motif chemokine 9 levels | rs181816009 | A | G | 21.97 | -0.160 | 0.034 | 2.77E-06 | 0.034 | 0.035 | 0.330 |
| C-X-C motif chemokine 9 levels | rs182152471 | T | C | 23.37 | 0.186 | 0.039 | 1.34E-06 | -0.025 | 0.039 | 0.520 |
| C-X-C motif chemokine 9 levels | rs3184504 | T | C | 60.12 | 0.101 | 0.013 | 8.92E-15 | -0.038 | 0.011 | 0.001 |
| C-X-C motif chemokine 9 levels | rs4241577 | A | C | 122.90 | -0.142 | 0.013 | 1.47E-28 | -0.009 | 0.013 | 0.480 |
| C-X-C motif chemokine 9 levels | rs4888966 | C | G | 20.95 | -0.157 | 0.034 | 4.71E-06 | -0.040 | 0.044 | 0.370 |
| C-X-C motif chemokine 9 levels | rs61875680 | A | G | 23.02 | -0.076 | 0.016 | 1.61E-06 | 0.003 | 0.015 | 0.870 |
| C-X-C motif chemokine 9 levels | rs62200304 | A | C | 22.21 | -0.115 | 0.024 | 2.44E-06 | 0.062 | 0.023 | 0.006 |
| C-X-C motif chemokine 9 levels | rs656739 | A | G | 22.30 | 0.056 | 0.012 | 2.33E-06 | 0.031 | 0.012 | 0.009 |
| C-X-C motif chemokine 9 levels | rs7149776 | A | T | 24.91 | -0.057 | 0.012 | 6.00E-07 | -0.010 | 0.011 | 0.360 |
| C-X-C motif chemokine 9 levels | rs73194812 | A | G | 21.69 | 0.182 | 0.039 | 3.20E-06 | 0.020 | 0.036 | 0.580 |
| C-X-C motif chemokine 9 levels | rs73367822 | T | C | 21.78 | -0.059 | 0.013 | 3.06E-06 | 0.008 | 0.011 | 0.450 |
| C-X-C motif chemokine 9 levels | rs73606147 | A | C | 22.39 | 0.279 | 0.059 | 2.22E-06 | -0.005 | 0.045 | 0.910 |
| C-X-C motif chemokine 9 levels | rs74956615 | A | T | 20.95 | -0.131 | 0.029 | 4.72E-06 | 0.028 | 0.024 | 0.250 |
| C-X-C motif chemokine 9 levels | rs7600322 | T | C | 23.33 | 0.057 | 0.012 | 1.36E-06 | -0.087 | 0.011 | 0.000 |
| C-X-C motif chemokine 9 levels | rs783149 | A | C | 31.25 | -0.081 | 0.014 | 2.27E-08 | -0.011 | 0.015 | 0.470 |
| C-X-C motif chemokine 9 levels | rs80348644 | T | C | 21.68 | 0.155 | 0.033 | 3.21E-06 | -0.005 | 0.033 | 0.870 |
| C-X-C motif chemokine 9 levels | rs9366778 | A | G | 27.68 | -0.061 | 0.012 | 1.43E-07 | -0.040 | 0.011 | 0.000 |
| Cystatin D levels | rs11054069 | T | C | 165.82 | 0.167 | 0.013 | 6.07E-38 | 0.007 | 0.013 | 0.550 |
| Cystatin D levels | rs12294339 | T | C | 35.39 | 0.070 | 0.012 | 2.70E-09 | -0.020 | 0.011 | 0.071 |
| Cystatin D levels | rs12625710 | T | C | 25.08 | -0.059 | 0.012 | 5.49E-07 | -0.019 | 0.011 | 0.094 |
| Cystatin D levels | rs13127297 | A | G | 21.70 | 0.055 | 0.012 | 3.19E-06 | 0.012 | 0.011 | 0.270 |
| Cystatin D levels | rs13397003 | T | G | 24.72 | 0.070 | 0.014 | 6.64E-07 | 0.002 | 0.013 | 0.850 |
| Cystatin D levels | rs141192864 | T | C | 22.75 | 0.102 | 0.021 | 1.84E-06 | 0.001 | 0.022 | 0.980 |
| Cystatin D levels | rs150547 | A | C | 21.21 | 0.055 | 0.012 | 4.12E-06 | -0.007 | 0.011 | 0.520 |
| Cystatin D levels | rs1536565 | A | G | 22.20 | -0.124 | 0.026 | 2.45E-06 | -0.013 | 0.025 | 0.620 |
| Cystatin D levels | rs17154027 | A | G | 21.27 | -0.056 | 0.012 | 4.00E-06 | -0.020 | 0.011 | 0.076 |
| Cystatin D levels | rs3889401 | A | G | 21.47 | 0.089 | 0.019 | 3.60E-06 | -0.003 | 0.016 | 0.850 |
| Cystatin D levels | rs4507745 | T | C | 21.83 | 0.057 | 0.012 | 2.98E-06 | 0.007 | 0.011 | 0.550 |
| Cystatin D levels | rs470841 | T | C | 22.78 | 0.057 | 0.012 | 1.81E-06 | -0.003 | 0.011 | 0.820 |
| Cystatin D levels | rs4756151 | A | C | 29.87 | -0.094 | 0.017 | 4.63E-08 | 0.005 | 0.016 | 0.760 |
| Cystatin D levels | rs4766797 | A | G | 24.07 | -0.057 | 0.012 | 9.30E-07 | 0.009 | 0.011 | 0.410 |
| Cystatin D levels | rs516316 | C | G | 53.99 | 0.085 | 0.012 | 2.01E-13 | -0.028 | 0.011 | 0.009 |
| Cystatin D levels | rs6049191 | T | G | 2355.44 | 0.665 | 0.014 | 1.00E-200 | 0.000 | 0.014 | 1.000 |
| Cystatin D levels | rs6083489 | A | G | 24.89 | 0.237 | 0.047 | 6.06E-07 | -0.039 | 0.042 | 0.360 |
| Cystatin D levels | rs62436191 | A | G | 26.04 | 0.119 | 0.023 | 3.35E-07 | -0.015 | 0.021 | 0.490 |
| Cystatin D levels | rs67020211 | T | G | 47.19 | 0.079 | 0.012 | 6.44E-12 | 0.022 | 0.011 | 0.046 |
| Cystatin D levels | rs697699 | A | C | 21.46 | 0.110 | 0.024 | 3.61E-06 | 0.033 | 0.021 | 0.120 |
| Cystatin D levels | rs7275493 | T | C | 23.10 | -0.057 | 0.012 | 1.53E-06 | -0.002 | 0.011 | 0.890 |
| Cystatin D levels | rs72980022 | A | G | 23.21 | 0.061 | 0.013 | 1.45E-06 | 0.008 | 0.012 | 0.530 |
| Cystatin D levels | rs77121303 | A | G | 22.37 | -0.252 | 0.053 | 2.25E-06 | 0.058 | 0.047 | 0.220 |
| Cystatin D levels | rs79359257 | T | C | 21.90 | 0.073 | 0.016 | 2.88E-06 | -0.017 | 0.014 | 0.240 |
| Cystatin D levels | rs930735 | A | G | 25.80 | 0.058 | 0.011 | 3.80E-07 | 0.009 | 0.011 | 0.420 |
| Cystatin D levels | rs9327707 | T | C | 25.00 | 0.059 | 0.012 | 5.73E-07 | 0.007 | 0.011 | 0.510 |
| Cystatin D levels | rs962720 | T | C | 21.99 | 0.056 | 0.012 | 2.74E-06 | 0.005 | 0.011 | 0.670 |
| Delta and Notch-like epidermal growth factor-related receptor levels | rs10191831 | T | C | 22.35 | -0.059 | 0.013 | 2.27E-06 | 0.005 | 0.011 | 0.630 |
| Delta and Notch-like epidermal growth factor-related receptor levels | rs10892466 | C | G | 21.32 | 0.081 | 0.018 | 3.89E-06 | 0.012 | 0.017 | 0.470 |
| Delta and Notch-like epidermal growth factor-related receptor levels | rs116179073 | T | C | 21.35 | -0.248 | 0.054 | 3.84E-06 | -0.009 | 0.045 | 0.850 |
| Delta and Notch-like epidermal growth factor-related receptor levels | rs117343254 | C | G | 21.86 | -0.128 | 0.027 | 2.94E-06 | -0.056 | 0.028 | 0.047 |
| Delta and Notch-like epidermal growth factor-related receptor levels | rs13107325 | T | C | 20.93 | 0.107 | 0.023 | 4.76E-06 | 0.037 | 0.020 | 0.068 |
| Delta and Notch-like epidermal growth factor-related receptor levels | rs194746 | T | C | 22.22 | 0.053 | 0.011 | 2.43E-06 | -0.014 | 0.011 | 0.190 |
| Delta and Notch-like epidermal growth factor-related receptor levels | rs207671 | A | G | 75.41 | 0.102 | 0.012 | 3.83E-18 | 0.000 | 0.011 | 0.990 |
| Delta and Notch-like epidermal growth factor-related receptor levels | rs2837988 | A | C | 23.83 | 0.058 | 0.012 | 1.05E-06 | -0.012 | 0.011 | 0.280 |
| Delta and Notch-like epidermal growth factor-related receptor levels | rs28689968 | T | C | 24.89 | 0.092 | 0.018 | 6.07E-07 | -0.016 | 0.018 | 0.380 |
| Delta and Notch-like epidermal growth factor-related receptor levels | rs62193248 | A | T | 299.88 | 0.213 | 0.012 | 3.50E-67 | 0.020 | 0.012 | 0.093 |
| Delta and Notch-like epidermal growth factor-related receptor levels | rs6517655 | C | G | 34.44 | 0.076 | 0.013 | 4.41E-09 | 0.024 | 0.012 | 0.046 |
| Delta and Notch-like epidermal growth factor-related receptor levels | rs75685422 | T | C | 22.33 | 0.088 | 0.019 | 2.29E-06 | -0.026 | 0.017 | 0.120 |
| Delta and Notch-like epidermal growth factor-related receptor levels | rs9289590 | T | C | 21.08 | -0.065 | 0.014 | 4.40E-06 | -0.004 | 0.011 | 0.740 |
| Delta and Notch-like epidermal growth factor-related receptor levels | rs9967959 | T | G | 22.31 | 0.072 | 0.015 | 2.32E-06 | 0.000 | 0.015 | 0.970 |
| Eotaxin levels | rs114744647 | T | C | 21.83 | 0.211 | 0.045 | 2.99E-06 | -0.052 | 0.036 | 0.140 |
| Eotaxin levels | rs12075 | A | G | 43.17 | 0.075 | 0.011 | 5.03E-11 | -0.007 | 0.011 | 0.520 |
| Eotaxin levels | rs139476527 | T | G | 21.75 | 0.283 | 0.061 | 3.11E-06 | -0.032 | 0.051 | 0.520 |
| Eotaxin levels | rs2112920 | C | G | 26.07 | 0.082 | 0.016 | 3.29E-07 | 0.003 | 0.015 | 0.820 |
| Eotaxin levels | rs2201150 | T | C | 40.73 | 0.079 | 0.012 | 1.75E-10 | 0.037 | 0.011 | 0.001 |
| Eotaxin levels | rs2228467 | T | C | 217.20 | -0.332 | 0.023 | 3.69E-49 | 0.028 | 0.023 | 0.220 |
| Eotaxin levels | rs34536806 | T | G | 23.91 | 0.102 | 0.021 | 1.01E-06 | 0.024 | 0.021 | 0.250 |
| Eotaxin levels | rs35543857 | A | G | 21.75 | -0.114 | 0.024 | 3.10E-06 | -0.096 | 0.022 | 0.000 |
| Eotaxin levels | rs55843637 | C | G | 21.04 | 0.056 | 0.012 | 4.50E-06 | 0.009 | 0.011 | 0.440 |
| Eotaxin levels | rs6894241 | A | C | 22.93 | -0.066 | 0.014 | 1.68E-06 | 0.020 | 0.013 | 0.120 |
| Eotaxin levels | rs73171545 | A | G | 21.20 | -0.086 | 0.019 | 4.14E-06 | -0.005 | 0.018 | 0.790 |
| Eotaxin levels | rs73209015 | A | T | 23.34 | -0.091 | 0.019 | 1.36E-06 | -0.019 | 0.019 | 0.310 |
| Eotaxin levels | rs757973 | A | G | 95.37 | 0.200 | 0.021 | 1.58E-22 | -0.017 | 0.019 | 0.380 |
| Eotaxin levels | rs79432525 | T | G | 20.89 | 0.193 | 0.042 | 4.85E-06 | -0.070 | 0.036 | 0.050 |
| Eotaxin levels | rs79684468 | T | C | 24.57 | 0.150 | 0.030 | 7.16E-07 | 0.021 | 0.029 | 0.470 |
| Eotaxin levels | rs79722574 | T | C | 60.66 | -0.122 | 0.016 | 6.78E-15 | 0.008 | 0.015 | 0.590 |
| Eotaxin levels | rs9940390 | T | C | 37.83 | -0.082 | 0.013 | 7.73E-10 | 0.014 | 0.012 | 0.260 |
| Eotaxin levels | rs9976282 | A | G | 23.66 | -0.168 | 0.035 | 1.15E-06 | -0.014 | 0.033 | 0.660 |
| Eukaryotic translation initiation factor 4E-binding protein 1 levels | rs10792025 | T | C | 22.87 | -0.059 | 0.012 | 1.73E-06 | 0.007 | 0.011 | 0.520 |
| Eukaryotic translation initiation factor 4E-binding protein 1 levels | rs137887001 | C | G | 21.15 | 0.224 | 0.049 | 4.25E-06 | 0.035 | 0.042 | 0.410 |
| Eukaryotic translation initiation factor 4E-binding protein 1 levels | rs181095999 | T | C | 22.05 | -0.223 | 0.047 | 2.65E-06 | -0.010 | 0.046 | 0.830 |
| Eukaryotic translation initiation factor 4E-binding protein 1 levels | rs2731672 | T | C | 37.11 | 0.093 | 0.015 | 1.11E-09 | -0.006 | 0.012 | 0.640 |
| Eukaryotic translation initiation factor 4E-binding protein 1 levels | rs2856226 | T | C | 21.62 | -0.100 | 0.021 | 3.33E-06 | -0.020 | 0.018 | 0.260 |
| Eukaryotic translation initiation factor 4E-binding protein 1 levels | rs356283 | T | G | 22.85 | 0.059 | 0.012 | 1.75E-06 | 0.015 | 0.011 | 0.180 |
| Eukaryotic translation initiation factor 4E-binding protein 1 levels | rs3733402 | A | G | 126.56 | -0.131 | 0.012 | 2.32E-29 | 0.000 | 0.011 | 0.990 |
| Eukaryotic translation initiation factor 4E-binding protein 1 levels | rs5030072 | T | C | 24.92 | 0.059 | 0.012 | 5.99E-07 | 0.006 | 0.011 | 0.600 |
| Eukaryotic translation initiation factor 4E-binding protein 1 levels | rs76686678 | T | G | 25.04 | 0.261 | 0.052 | 5.62E-07 | 0.044 | 0.046 | 0.330 |
| Fibroblast growth factor 19 levels | rs10777251 | A | G | 21.35 | -0.077 | 0.017 | 3.83E-06 | -0.015 | 0.013 | 0.250 |
| Fibroblast growth factor 19 levels | rs112126444 | A | G | 21.70 | -0.093 | 0.020 | 3.19E-06 | 0.035 | 0.018 | 0.050 |
| Fibroblast growth factor 19 levels | rs11244038 | C | G | 23.56 | 0.120 | 0.025 | 1.21E-06 | -0.017 | 0.023 | 0.440 |
| Fibroblast growth factor 19 levels | rs12110436 | T | C | 20.97 | -0.136 | 0.030 | 4.67E-06 | -0.053 | 0.028 | 0.054 |
| Fibroblast growth factor 19 levels | rs12407505 | A | G | 21.02 | -0.161 | 0.035 | 4.53E-06 | -0.006 | 0.032 | 0.850 |
| Fibroblast growth factor 19 levels | rs12520287 | T | C | 21.05 | -0.101 | 0.022 | 4.47E-06 | -0.006 | 0.020 | 0.770 |
| Fibroblast growth factor 19 levels | rs13103023 | A | G | 45.56 | 0.084 | 0.012 | 1.48E-11 | 0.003 | 0.012 | 0.790 |
| Fibroblast growth factor 19 levels | rs142067135 | A | G | 21.76 | -0.230 | 0.049 | 3.09E-06 | 0.029 | 0.039 | 0.450 |
| Fibroblast growth factor 19 levels | rs145274424 | T | C | 22.39 | 0.199 | 0.042 | 2.23E-06 | -0.049 | 0.040 | 0.220 |
| Fibroblast growth factor 19 levels | rs1671812 | T | C | 22.13 | 0.062 | 0.013 | 2.54E-06 | -0.012 | 0.011 | 0.270 |
| Fibroblast growth factor 19 levels | rs17326790 | T | C | 21.05 | 0.216 | 0.047 | 4.47E-06 | 0.042 | 0.043 | 0.330 |
| Fibroblast growth factor 19 levels | rs191522330 | T | C | 22.70 | 0.233 | 0.049 | 1.89E-06 | -0.048 | 0.045 | 0.290 |
| Fibroblast growth factor 19 levels | rs2906655 | T | C | 21.30 | -0.062 | 0.014 | 3.93E-06 | -0.008 | 0.013 | 0.530 |
| Fibroblast growth factor 19 levels | rs35836706 | A | G | 22.25 | 0.215 | 0.046 | 2.39E-06 | 0.019 | 0.039 | 0.620 |
| Fibroblast growth factor 19 levels | rs516246 | T | C | 198.14 | -0.166 | 0.012 | 5.31E-45 | -0.028 | 0.011 | 0.009 |
| Fibroblast growth factor 19 levels | rs7005978 | A | G | 73.57 | -0.106 | 0.012 | 9.72E-18 | -0.005 | 0.012 | 0.680 |
| Fibroblast growth factor 19 levels | rs76708593 | T | C | 21.28 | 0.102 | 0.022 | 3.98E-06 | 0.008 | 0.020 | 0.690 |
| Fibroblast growth factor 19 levels | rs79110990 | A | G | 21.90 | 0.073 | 0.016 | 2.88E-06 | 0.008 | 0.015 | 0.570 |
| Fibroblast growth factor 19 levels | rs834971 | A | G | 23.01 | -0.061 | 0.013 | 1.61E-06 | 0.009 | 0.012 | 0.450 |
| Fibroblast growth factor 21 levels | rs10495032 | T | G | 23.97 | -0.156 | 0.032 | 9.77E-07 | 0.013 | 0.029 | 0.660 |
| Fibroblast growth factor 21 levels | rs12290350 | T | C | 22.58 | -0.069 | 0.015 | 2.02E-06 | 0.003 | 0.014 | 0.810 |
| Fibroblast growth factor 21 levels | rs1260326 | T | C | 123.60 | 0.132 | 0.012 | 1.03E-28 | 0.002 | 0.011 | 0.830 |
| Fibroblast growth factor 21 levels | rs13229619 | A | G | 83.58 | -0.161 | 0.018 | 6.13E-20 | -0.007 | 0.016 | 0.680 |
| Fibroblast growth factor 21 levels | rs142603673 | T | C | 26.72 | -0.235 | 0.046 | 2.35E-07 | 0.008 | 0.043 | 0.850 |
| Fibroblast growth factor 21 levels | rs145127946 | A | G | 23.55 | -0.175 | 0.036 | 1.22E-06 | -0.060 | 0.034 | 0.079 |
| Fibroblast growth factor 21 levels | rs2429473 | A | C | 30.51 | -0.081 | 0.015 | 3.32E-08 | 0.015 | 0.014 | 0.290 |
| Fibroblast growth factor 21 levels | rs60277384 | T | C | 21.50 | -0.088 | 0.019 | 3.54E-06 | 0.008 | 0.018 | 0.660 |
| Fibroblast growth factor 21 levels | rs7012637 | A | G | 25.42 | -0.061 | 0.012 | 4.61E-07 | 0.018 | 0.011 | 0.110 |
| Fibroblast growth factor 21 levels | rs72965996 | A | G | 24.89 | -0.222 | 0.044 | 6.08E-07 | 0.059 | 0.040 | 0.150 |
| Fibroblast growth factor 21 levels | rs7610704 | T | C | 22.40 | -0.057 | 0.012 | 2.21E-06 | -0.012 | 0.011 | 0.250 |
| Fibroblast growth factor 23 levels | rs118177380 | A | G | 21.70 | 0.236 | 0.051 | 3.18E-06 | 0.027 | 0.045 | 0.550 |
| Fibroblast growth factor 23 levels | rs11930290 | A | T | 22.50 | -0.185 | 0.039 | 2.11E-06 | -0.031 | 0.035 | 0.370 |
| Fibroblast growth factor 23 levels | rs12195292 | A | G | 21.40 | -0.077 | 0.017 | 3.72E-06 | 0.023 | 0.016 | 0.160 |
| Fibroblast growth factor 23 levels | rs33921462 | A | G | 23.40 | -0.065 | 0.014 | 1.32E-06 | 0.008 | 0.013 | 0.510 |
| Fibroblast growth factor 23 levels | rs34551523 | A | G | 23.98 | 0.170 | 0.035 | 9.75E-07 | 0.004 | 0.033 | 0.890 |
| Fibroblast growth factor 23 levels | rs368215473 | A | G | 22.83 | 0.123 | 0.026 | 1.77E-06 | -0.013 | 0.018 | 0.460 |
| Fibroblast growth factor 23 levels | rs3811621 | C | G | 78.82 | 0.116 | 0.013 | 6.82E-19 | 0.009 | 0.012 | 0.460 |
| Fibroblast growth factor 23 levels | rs671205 | T | C | 27.10 | 0.071 | 0.014 | 1.93E-07 | 0.001 | 0.013 | 0.970 |
| Fibroblast growth factor 23 levels | rs6753743 | T | G | 25.87 | 0.094 | 0.019 | 3.65E-07 | 0.014 | 0.018 | 0.440 |
| Fibroblast growth factor 23 levels | rs794007 | T | C | 22.63 | 0.069 | 0.014 | 1.97E-06 | -0.015 | 0.013 | 0.240 |
| Fibroblast growth factor 23 levels | rs7955866 | A | G | 29.03 | -0.096 | 0.018 | 7.14E-08 | 0.027 | 0.017 | 0.100 |
| Fibroblast growth factor 5 levels | rs11099098 | T | G | 1687.51 | 0.518 | 0.013 | 1.00E-200 | 0.020 | 0.012 | 0.098 |
| Fibroblast growth factor 5 levels | rs11120686 | T | C | 22.25 | -0.060 | 0.013 | 2.40E-06 | 0.004 | 0.011 | 0.690 |
| Fibroblast growth factor 5 levels | rs11674185 | A | G | 20.96 | -0.059 | 0.013 | 4.69E-06 | 0.003 | 0.011 | 0.760 |
| Fibroblast growth factor 5 levels | rs117253850 | T | C | 25.02 | 0.227 | 0.045 | 5.67E-07 | 0.026 | 0.034 | 0.450 |
| Fibroblast growth factor 5 levels | rs12005489 | T | C | 21.96 | 0.151 | 0.032 | 2.78E-06 | -0.006 | 0.030 | 0.840 |
| Fibroblast growth factor 5 levels | rs1412253 | A | G | 22.41 | -0.091 | 0.019 | 2.20E-06 | -0.018 | 0.017 | 0.280 |
| Fibroblast growth factor 5 levels | rs148332905 | T | C | 22.48 | 0.288 | 0.061 | 2.12E-06 | 0.012 | 0.049 | 0.800 |
| Fibroblast growth factor 5 levels | rs148797749 | A | G | 22.31 | -0.171 | 0.036 | 2.32E-06 | -0.047 | 0.037 | 0.210 |
| Fibroblast growth factor 5 levels | rs150524893 | A | G | 21.41 | 0.255 | 0.055 | 3.71E-06 | 0.042 | 0.044 | 0.340 |
| Fibroblast growth factor 5 levels | rs17004843 | C | G | 84.50 | 0.172 | 0.019 | 3.84E-20 | 0.009 | 0.016 | 0.580 |
| Fibroblast growth factor 5 levels | rs192746810 | A | G | 21.75 | -0.184 | 0.040 | 3.11E-06 | 0.012 | 0.038 | 0.740 |
| Fibroblast growth factor 5 levels | rs305897 | T | C | 22.65 | 0.119 | 0.025 | 1.95E-06 | -0.010 | 0.020 | 0.620 |
| Fibroblast growth factor 5 levels | rs3796605 | A | G | 33.13 | 0.163 | 0.028 | 8.60E-09 | 0.019 | 0.030 | 0.520 |
| Fibroblast growth factor 5 levels | rs4326078 | A | C | 23.55 | -0.073 | 0.015 | 1.21E-06 | -0.027 | 0.013 | 0.042 |
| Fibroblast growth factor 5 levels | rs4970834 | T | C | 22.12 | -0.073 | 0.016 | 2.56E-06 | 0.000 | 0.014 | 0.990 |
| Fibroblast growth factor 5 levels | rs56391958 | A | G | 23.11 | -0.120 | 0.025 | 1.53E-06 | 0.032 | 0.020 | 0.100 |
| Fibroblast growth factor 5 levels | rs62302222 | A | T | 23.67 | 0.141 | 0.029 | 1.14E-06 | 0.013 | 0.023 | 0.560 |
| Fibroblast growth factor 5 levels | rs624605 | T | G | 21.66 | 0.062 | 0.013 | 3.25E-06 | -0.013 | 0.011 | 0.260 |
| Fibroblast growth factor 5 levels | rs66613644 | T | C | 25.06 | -0.083 | 0.017 | 5.56E-07 | 0.016 | 0.015 | 0.260 |
| Fibroblast growth factor 5 levels | rs77210320 | A | T | 22.08 | 0.167 | 0.036 | 2.61E-06 | 0.009 | 0.032 | 0.770 |
| Fibroblast growth factor 5 levels | rs9433760 | A | G | 20.86 | 0.102 | 0.022 | 4.95E-06 | 0.018 | 0.019 | 0.340 |
| Fms-related tyrosine kinase 3 ligand levels | rs10164255 | T | G | 21.11 | 0.056 | 0.012 | 4.33E-06 | -0.009 | 0.011 | 0.420 |
| Fms-related tyrosine kinase 3 ligand levels | rs11212636 | A | G | 43.54 | -0.077 | 0.012 | 4.16E-11 | 0.048 | 0.011 | 0.000 |
| Fms-related tyrosine kinase 3 ligand levels | rs1277312 | A | T | 21.22 | 0.054 | 0.012 | 4.09E-06 | -0.004 | 0.011 | 0.710 |
| Fms-related tyrosine kinase 3 ligand levels | rs1321859 | T | C | 27.89 | 0.068 | 0.013 | 1.28E-07 | -0.069 | 0.012 | 0.000 |
| Fms-related tyrosine kinase 3 ligand levels | rs141117375 | T | C | 21.06 | -0.152 | 0.033 | 4.45E-06 | 0.022 | 0.029 | 0.440 |
| Fms-related tyrosine kinase 3 ligand levels | rs144317085 | A | T | 46.36 | 0.221 | 0.032 | 9.85E-12 | 0.017 | 0.031 | 0.580 |
| Fms-related tyrosine kinase 3 ligand levels | rs17272847 | A | G | 28.72 | 0.118 | 0.022 | 8.36E-08 | -0.039 | 0.020 | 0.046 |
| Fms-related tyrosine kinase 3 ligand levels | rs185979634 | T | C | 23.49 | 0.148 | 0.031 | 1.26E-06 | 0.008 | 0.025 | 0.760 |
| Fms-related tyrosine kinase 3 ligand levels | rs1866051 | T | C | 42.08 | -0.075 | 0.012 | 8.76E-11 | 0.019 | 0.011 | 0.079 |
| Fms-related tyrosine kinase 3 ligand levels | rs186975 | C | G | 21.67 | 0.055 | 0.012 | 3.23E-06 | -0.003 | 0.011 | 0.760 |
| Fms-related tyrosine kinase 3 ligand levels | rs192857133 | T | C | 22.04 | 0.181 | 0.039 | 2.68E-06 | 0.021 | 0.035 | 0.560 |
| Fms-related tyrosine kinase 3 ligand levels | rs218265 | T | C | 27.11 | 0.083 | 0.016 | 1.93E-07 | -0.019 | 0.015 | 0.210 |
| Fms-related tyrosine kinase 3 ligand levels | rs28533776 | A | G | 25.96 | -0.075 | 0.015 | 3.48E-07 | 0.002 | 0.014 | 0.910 |
| Fms-related tyrosine kinase 3 ligand levels | rs55633025 | A | G | 31.59 | 0.073 | 0.013 | 1.91E-08 | -0.008 | 0.011 | 0.440 |
| Fms-related tyrosine kinase 3 ligand levels | rs57191857 | A | G | 22.84 | -0.143 | 0.030 | 1.76E-06 | -0.056 | 0.027 | 0.036 |
| Fms-related tyrosine kinase 3 ligand levels | rs575588389 | A | G | 22.17 | -0.090 | 0.019 | 2.50E-06 | -0.003 | 0.015 | 0.840 |
| Fms-related tyrosine kinase 3 ligand levels | rs61792394 | A | G | 21.55 | -0.157 | 0.034 | 3.45E-06 | 0.004 | 0.026 | 0.880 |
| Fms-related tyrosine kinase 3 ligand levels | rs6453962 | T | C | 22.83 | -0.056 | 0.012 | 1.77E-06 | -0.006 | 0.011 | 0.560 |
| Fms-related tyrosine kinase 3 ligand levels | rs72681653 | A | G | 23.96 | 0.130 | 0.027 | 9.84E-07 | -0.029 | 0.026 | 0.280 |
| Fms-related tyrosine kinase 3 ligand levels | rs73000965 | A | T | 22.13 | 0.059 | 0.013 | 2.55E-06 | 0.008 | 0.012 | 0.490 |
| Fms-related tyrosine kinase 3 ligand levels | rs7624160 | T | G | 79.49 | -0.106 | 0.012 | 4.84E-19 | -0.009 | 0.011 | 0.440 |
| Fms-related tyrosine kinase 3 ligand levels | rs76428106 | T | C | 442.20 | -1.102 | 0.052 | 3.59E-98 | 0.030 | 0.053 | 0.570 |
| Fms-related tyrosine kinase 3 ligand levels | rs7726159 | A | C | 86.58 | -0.119 | 0.013 | 1.34E-20 | 0.040 | 0.011 | 0.000 |
| Fms-related tyrosine kinase 3 ligand levels | rs9381118 | T | C | 22.35 | 0.064 | 0.014 | 2.27E-06 | 0.021 | 0.012 | 0.084 |
| Fms-related tyrosine kinase 3 ligand levels | rs9554186 | A | T | 41.14 | 0.082 | 0.013 | 1.42E-10 | -0.024 | 0.011 | 0.039 |
| Fractalkine levels | rs10778675 | A | C | 25.13 | 0.079 | 0.016 | 5.37E-07 | -0.011 | 0.015 | 0.450 |
| Fractalkine levels | rs111472651 | C | G | 23.06 | -0.119 | 0.025 | 1.57E-06 | 0.056 | 0.024 | 0.023 |
| Fractalkine levels | rs114359340 | A | G | 21.57 | -0.188 | 0.041 | 3.41E-06 | -0.003 | 0.035 | 0.940 |
| Fractalkine levels | rs11682107 | A | G | 28.70 | -0.068 | 0.013 | 8.45E-08 | -0.005 | 0.011 | 0.650 |
| Fractalkine levels | rs117698194 | A | G | 21.35 | -0.200 | 0.043 | 3.83E-06 | -0.056 | 0.038 | 0.140 |
| Fractalkine levels | rs12331618 | A | G | 26.06 | -0.058 | 0.011 | 3.30E-07 | -0.001 | 0.011 | 0.940 |
| Fractalkine levels | rs13167439 | T | C | 21.89 | -0.090 | 0.019 | 2.89E-06 | 0.011 | 0.019 | 0.570 |
| Fractalkine levels | rs1976172 | C | G | 22.48 | -0.057 | 0.012 | 2.12E-06 | 0.008 | 0.011 | 0.500 |
| Fractalkine levels | rs2442752 | T | C | 25.34 | -0.059 | 0.012 | 4.80E-07 | 0.016 | 0.011 | 0.140 |
| Fractalkine levels | rs2736723 | A | T | 24.75 | 0.060 | 0.012 | 6.52E-07 | 0.008 | 0.011 | 0.490 |
| Fractalkine levels | rs35026817 | T | G | 26.92 | 0.063 | 0.012 | 2.12E-07 | 0.001 | 0.012 | 0.940 |
| Fractalkine levels | rs3732378 | A | G | 37.34 | 0.094 | 0.015 | 9.94E-10 | 0.027 | 0.014 | 0.054 |
| Fractalkine levels | rs55896747 | T | C | 21.41 | 0.113 | 0.024 | 3.71E-06 | 0.019 | 0.023 | 0.400 |
| Fractalkine levels | rs56397903 | A | G | 21.54 | 0.197 | 0.042 | 3.46E-06 | 0.060 | 0.043 | 0.160 |
| Fractalkine levels | rs571946532 | A | C | 22.05 | -0.240 | 0.051 | 2.66E-06 | -0.031 | 0.047 | 0.510 |
| Fractalkine levels | rs635634 | T | C | 47.58 | -0.115 | 0.017 | 5.29E-12 | -0.007 | 0.014 | 0.600 |
| Fractalkine levels | rs671623 | C | G | 299.17 | 0.204 | 0.012 | 4.99E-67 | -0.011 | 0.011 | 0.300 |
| Fractalkine levels | rs712137 | A | C | 22.01 | 0.056 | 0.012 | 2.71E-06 | 0.008 | 0.011 | 0.460 |
| Fractalkine levels | rs7763262 | T | C | 45.68 | 0.081 | 0.012 | 1.40E-11 | 0.004 | 0.011 | 0.750 |
| Fractalkine levels | rs77915710 | A | G | 22.31 | -0.144 | 0.030 | 2.32E-06 | -0.033 | 0.028 | 0.230 |
| Fractalkine levels | rs8052631 | A | G | 31.32 | -0.151 | 0.027 | 2.19E-08 | -0.039 | 0.025 | 0.120 |
| Fractalkine levels | rs980364 | A | G | 24.14 | 0.148 | 0.030 | 8.94E-07 | 0.005 | 0.024 | 0.830 |
| Glial cell line-derived neurotrophic factor levels | rs112594435 | T | C | 21.14 | 0.153 | 0.033 | 4.27E-06 | -0.013 | 0.031 | 0.680 |
| Glial cell line-derived neurotrophic factor levels | rs11740708 | A | G | 385.59 | -0.389 | 0.020 | 7.56E-86 | 0.014 | 0.018 | 0.460 |
| Glial cell line-derived neurotrophic factor levels | rs138691533 | A | G | 22.98 | 0.258 | 0.054 | 1.63E-06 | -0.061 | 0.050 | 0.220 |
| Glial cell line-derived neurotrophic factor levels | rs2093446 | C | G | 22.07 | 0.061 | 0.013 | 2.63E-06 | 0.001 | 0.012 | 0.920 |
| Glial cell line-derived neurotrophic factor levels | rs2194229 | A | T | 88.40 | -0.168 | 0.018 | 5.34E-21 | -0.029 | 0.016 | 0.078 |
| Glial cell line-derived neurotrophic factor levels | rs2453338 | A | T | 44.70 | 0.083 | 0.012 | 2.30E-11 | 0.007 | 0.012 | 0.560 |
| Glial cell line-derived neurotrophic factor levels | rs540456481 | T | G | 22.79 | -0.294 | 0.062 | 1.80E-06 | 0.022 | 0.054 | 0.680 |
| Glial cell line-derived neurotrophic factor levels | rs55850217 | T | C | 33.97 | 0.082 | 0.014 | 5.59E-09 | -0.012 | 0.012 | 0.320 |
| Glial cell line-derived neurotrophic factor levels | rs57104839 | A | G | 21.79 | 0.092 | 0.020 | 3.04E-06 | -0.019 | 0.019 | 0.320 |
| Glial cell line-derived neurotrophic factor levels | rs62243355 | T | C | 25.05 | -0.098 | 0.020 | 5.58E-07 | 0.031 | 0.018 | 0.078 |
| Glial cell line-derived neurotrophic factor levels | rs77671113 | A | C | 32.95 | -0.119 | 0.021 | 9.45E-09 | 0.019 | 0.020 | 0.330 |
| Glial cell line-derived neurotrophic factor levels | rs79953230 | T | C | 20.85 | 0.192 | 0.042 | 4.96E-06 | 0.029 | 0.046 | 0.530 |
| Glial cell line-derived neurotrophic factor levels | rs9303102 | T | G | 21.41 | 0.210 | 0.045 | 3.71E-06 | 0.007 | 0.040 | 0.860 |
| Hepatocyte growth factor levels | rs150498795 | A | T | 22.93 | 0.157 | 0.033 | 1.68E-06 | -0.008 | 0.029 | 0.770 |
| Hepatocyte growth factor levels | rs1986719 | T | C | 25.10 | -0.195 | 0.039 | 5.44E-07 | -0.062 | 0.049 | 0.210 |
| Hepatocyte growth factor levels | rs2281532 | T | C | 21.37 | -0.070 | 0.015 | 3.79E-06 | -0.002 | 0.014 | 0.860 |
| Hepatocyte growth factor levels | rs2737756 | A | G | 27.41 | 0.205 | 0.039 | 1.65E-07 | 0.013 | 0.033 | 0.690 |
| Hepatocyte growth factor levels | rs4290523 | T | C | 20.90 | -0.099 | 0.022 | 4.84E-06 | -0.003 | 0.018 | 0.880 |
| Hepatocyte growth factor levels | rs57193877 | T | C | 25.55 | 0.157 | 0.031 | 4.31E-07 | 0.051 | 0.030 | 0.085 |
| Hepatocyte growth factor levels | rs5745687 | T | C | 64.46 | -0.194 | 0.024 | 9.83E-16 | 0.013 | 0.022 | 0.550 |
| Hepatocyte growth factor levels | rs5745692 | C | G | 21.66 | -0.155 | 0.033 | 3.26E-06 | 0.032 | 0.032 | 0.310 |
| Hepatocyte growth factor levels | rs6709159 | A | G | 24.48 | 0.056 | 0.011 | 7.52E-07 | 0.010 | 0.011 | 0.360 |
| Hepatocyte growth factor levels | rs7620568 | A | G | 22.87 | -0.086 | 0.018 | 1.73E-06 | 0.015 | 0.017 | 0.390 |
| Hepatocyte growth factor levels | rs8106345 | A | G | 21.73 | 0.059 | 0.013 | 3.14E-06 | -0.006 | 0.011 | 0.610 |
| Hepatocyte growth factor levels | rs851612 | A | G | 21.15 | -0.118 | 0.026 | 4.24E-06 | -0.018 | 0.025 | 0.470 |
| Interferon gamma levels | rs146527076 | C | G | 25.39 | 0.194 | 0.038 | 4.68E-07 | 0.020 | 0.031 | 0.520 |
| Interferon gamma levels | rs4810686 | T | C | 23.99 | 0.067 | 0.014 | 9.69E-07 | 0.004 | 0.011 | 0.730 |
| Interferon gamma levels | rs61863416 | A | G | 23.09 | 0.136 | 0.028 | 1.54E-06 | 0.014 | 0.023 | 0.540 |
| Interferon gamma levels | rs62230781 | A | G | 29.37 | 0.218 | 0.040 | 5.98E-08 | -0.058 | 0.033 | 0.074 |
| Interferon gamma levels | rs67101138 | T | G | 22.65 | 0.146 | 0.031 | 1.95E-06 | -0.007 | 0.030 | 0.810 |
| Interleukin-10 levels | rs10067443 | T | C | 25.54 | -0.075 | 0.015 | 4.33E-07 | 0.016 | 0.014 | 0.240 |
| Interleukin-10 levels | rs138203589 | T | G | 21.47 | 0.194 | 0.042 | 3.59E-06 | -0.044 | 0.042 | 0.290 |
| Interleukin-10 levels | rs17654493 | T | C | 22.22 | 0.295 | 0.063 | 2.43E-06 | 0.032 | 0.046 | 0.480 |
| Interleukin-10 levels | rs188535859 | T | C | 23.40 | -0.235 | 0.049 | 1.32E-06 | 0.004 | 0.041 | 0.920 |
| Interleukin-10 levels | rs3135932 | A | G | 107.54 | -0.160 | 0.015 | 3.39E-25 | -0.001 | 0.015 | 0.940 |
| Interleukin-10 levels | rs3769274 | A | G | 22.65 | 0.077 | 0.016 | 1.94E-06 | 0.015 | 0.015 | 0.320 |
| Interleukin-10 levels | rs385697 | T | C | 21.75 | 0.056 | 0.012 | 3.10E-06 | -0.017 | 0.011 | 0.140 |
| Interleukin-10 levels | rs389239 | A | G | 21.09 | -0.057 | 0.013 | 4.39E-06 | 0.023 | 0.011 | 0.043 |
| Interleukin-10 levels | rs398518 | A | G | 35.18 | -0.129 | 0.022 | 3.01E-09 | -0.022 | 0.019 | 0.250 |
| Interleukin-10 levels | rs4655953 | A | G | 21.80 | 0.057 | 0.012 | 3.02E-06 | 0.002 | 0.011 | 0.830 |
| Interleukin-10 levels | rs66624860 | T | C | 22.68 | 0.068 | 0.014 | 1.91E-06 | -0.010 | 0.013 | 0.420 |
| Interleukin-10 levels | rs72701782 | A | G | 21.62 | 0.098 | 0.021 | 3.33E-06 | -0.019 | 0.019 | 0.310 |
| Interleukin-10 receptor subunit alpha levels | rs10091841 | T | G | 22.47 | 0.064 | 0.014 | 2.13E-06 | 0.025 | 0.011 | 0.022 |
| Interleukin-10 receptor subunit alpha levels | rs1406714 | C | G | 22.62 | 0.062 | 0.013 | 1.98E-06 | -0.004 | 0.011 | 0.740 |
| Interleukin-10 receptor subunit alpha levels | rs17832137 | A | G | 23.88 | 0.168 | 0.034 | 1.03E-06 | 0.004 | 0.026 | 0.880 |
| Interleukin-10 receptor subunit alpha levels | rs286605 | T | G | 22.62 | 0.062 | 0.013 | 1.98E-06 | 0.002 | 0.011 | 0.840 |
| Interleukin-10 receptor subunit alpha levels | rs3135932 | A | G | 25.24 | -0.084 | 0.017 | 5.07E-07 | -0.001 | 0.015 | 0.940 |
| Interleukin-10 receptor subunit alpha levels | rs41272625 | T | G | 20.99 | 0.082 | 0.018 | 4.63E-06 | -0.008 | 0.015 | 0.600 |
| Interleukin-10 receptor subunit alpha levels | rs6670799 | A | G | 24.49 | -0.125 | 0.025 | 7.48E-07 | -0.006 | 0.020 | 0.750 |
| Interleukin-10 receptor subunit alpha levels | rs80137559 | T | C | 21.10 | 0.235 | 0.051 | 4.37E-06 | -0.097 | 0.041 | 0.019 |
| Interleukin-10 receptor subunit beta levels | rs111850948 | A | G | 21.69 | -0.084 | 0.018 | 3.20E-06 | 0.014 | 0.016 | 0.380 |
| Interleukin-10 receptor subunit beta levels | rs112798338 | T | C | 21.96 | 0.193 | 0.041 | 2.78E-06 | 0.098 | 0.040 | 0.015 |
| Interleukin-10 receptor subunit beta levels | rs114288486 | T | C | 21.71 | 0.145 | 0.031 | 3.17E-06 | 0.039 | 0.030 | 0.190 |
| Interleukin-10 receptor subunit beta levels | rs1153572 | T | C | 21.21 | -0.055 | 0.012 | 4.12E-06 | 0.021 | 0.011 | 0.056 |
| Interleukin-10 receptor subunit beta levels | rs116315732 | T | C | 24.46 | 0.199 | 0.040 | 7.60E-07 | 0.028 | 0.039 | 0.470 |
| Interleukin-10 receptor subunit beta levels | rs149156511 | A | G | 21.65 | 0.207 | 0.044 | 3.27E-06 | 0.050 | 0.044 | 0.250 |
| Interleukin-10 receptor subunit beta levels | rs1605333 | C | G | 23.49 | -0.060 | 0.012 | 1.25E-06 | -0.004 | 0.011 | 0.710 |
| Interleukin-10 receptor subunit beta levels | rs192325200 | A | G | 21.23 | -0.233 | 0.051 | 4.07E-06 | 0.057 | 0.042 | 0.180 |
| Interleukin-10 receptor subunit beta levels | rs2834261 | T | C | 33.89 | -0.082 | 0.014 | 5.83E-09 | 0.012 | 0.013 | 0.380 |
| Interleukin-10 receptor subunit beta levels | rs34361138 | A | G | 22.16 | 0.053 | 0.011 | 2.50E-06 | 0.005 | 0.011 | 0.660 |
| Interleukin-10 receptor subunit beta levels | rs55780441 | T | C | 26.25 | 0.178 | 0.035 | 3.00E-07 | -0.052 | 0.039 | 0.190 |
| Interleukin-10 receptor subunit beta levels | rs6584485 | T | C | 21.30 | 0.074 | 0.016 | 3.93E-06 | -0.024 | 0.015 | 0.110 |
| Interleukin-10 receptor subunit beta levels | rs7855466 | T | C | 25.96 | 0.086 | 0.017 | 3.49E-07 | -0.012 | 0.017 | 0.450 |
| Interleukin-10 receptor subunit beta levels | rs8178528 | A | G | 1187.28 | -0.400 | 0.012 | 1.00E-200 | 0.015 | 0.011 | 0.180 |
| Interleukin-10 receptor subunit beta levels | rs9685374 | A | G | 21.27 | -0.062 | 0.013 | 3.99E-06 | 0.000 | 0.013 | 0.980 |
| Interleukin-12 subunit beta levels | rs11039216 | T | C | 25.69 | 0.059 | 0.012 | 4.00E-07 | -0.007 | 0.011 | 0.530 |
| Interleukin-12 subunit beta levels | rs11130215 | A | G | 44.65 | -0.101 | 0.015 | 2.36E-11 | 0.041 | 0.015 | 0.004 |
| Interleukin-12 subunit beta levels | rs117888068 | T | C | 21.53 | 0.219 | 0.047 | 3.49E-06 | -0.028 | 0.039 | 0.470 |
| Interleukin-12 subunit beta levels | rs12588969 | C | G | 104.30 | -0.130 | 0.013 | 1.74E-24 | -0.004 | 0.012 | 0.700 |
| Interleukin-12 subunit beta levels | rs12766137 | C | G | 22.64 | 0.071 | 0.015 | 1.95E-06 | 0.008 | 0.014 | 0.560 |
| Interleukin-12 subunit beta levels | rs1398590 | A | G | 29.45 | -0.197 | 0.036 | 5.73E-08 | 0.005 | 0.032 | 0.860 |
| Interleukin-12 subunit beta levels | rs144850787 | T | G | 31.86 | 0.316 | 0.056 | 1.66E-08 | -0.040 | 0.052 | 0.440 |
| Interleukin-12 subunit beta levels | rs148549227 | T | C | 22.77 | 0.109 | 0.023 | 1.82E-06 | 0.001 | 0.019 | 0.960 |
| Interleukin-12 subunit beta levels | rs17056751 | A | G | 27.17 | 0.169 | 0.033 | 1.87E-07 | 0.014 | 0.031 | 0.650 |
| Interleukin-12 subunit beta levels | rs17722688 | T | C | 42.80 | -0.086 | 0.013 | 6.07E-11 | 0.000 | 0.012 | 0.970 |
| Interleukin-12 subunit beta levels | rs1950897 | T | C | 38.87 | 0.080 | 0.013 | 4.54E-10 | -0.020 | 0.012 | 0.091 |
| Interleukin-12 subunit beta levels | rs3130510 | A | G | 68.06 | 0.116 | 0.014 | 1.58E-16 | 0.018 | 0.012 | 0.150 |
| Interleukin-12 subunit beta levels | rs516978 | C | G | 34.93 | 0.072 | 0.012 | 3.42E-09 | -0.005 | 0.011 | 0.670 |
| Interleukin-12 subunit beta levels | rs539598 | T | C | 27.14 | -0.067 | 0.013 | 1.90E-07 | -0.009 | 0.012 | 0.430 |
| Interleukin-12 subunit beta levels | rs6556416 | A | C | 1650.89 | -0.496 | 0.012 | 1.00E-200 | -0.022 | 0.012 | 0.065 |
| Interleukin-12 subunit beta levels | rs6750065 | T | C | 21.96 | 0.063 | 0.013 | 2.78E-06 | -0.002 | 0.012 | 0.850 |
| Interleukin-12 subunit beta levels | rs6968201 | T | G | 27.32 | -0.062 | 0.012 | 1.72E-07 | -0.022 | 0.011 | 0.045 |
| Interleukin-12 subunit beta levels | rs705705 | C | G | 34.84 | 0.079 | 0.013 | 3.59E-09 | -0.033 | 0.012 | 0.004 |
| Interleukin-12 subunit beta levels | rs72993671 | A | G | 21.99 | -0.204 | 0.044 | 2.74E-06 | -0.053 | 0.039 | 0.170 |
| Interleukin-12 subunit beta levels | rs73416208 | A | G | 36.05 | -0.148 | 0.025 | 1.92E-09 | -0.002 | 0.024 | 0.920 |
| Interleukin-12 subunit beta levels | rs76428106 | T | C | 40.53 | -0.341 | 0.054 | 1.94E-10 | 0.030 | 0.053 | 0.570 |
| Interleukin-12 subunit beta levels | rs780679 | T | C | 25.00 | -0.070 | 0.014 | 5.73E-07 | 0.035 | 0.013 | 0.006 |
| Interleukin-12 subunit beta levels | rs8026767 | A | G | 31.68 | -0.074 | 0.013 | 1.81E-08 | 0.011 | 0.012 | 0.380 |
| Interleukin-12 subunit beta levels | rs9965402 | A | G | 20.86 | 0.092 | 0.020 | 4.94E-06 | 0.021 | 0.019 | 0.270 |
| Interleukin-13 levels | rs10446322 | A | G | 23.51 | 0.064 | 0.013 | 1.24E-06 | -0.005 | 0.011 | 0.680 |
| Interleukin-13 levels | rs10893042 | C | G | 21.90 | -0.070 | 0.015 | 2.87E-06 | 0.008 | 0.012 | 0.470 |
| Interleukin-13 levels | rs10917637 | A | G | 25.89 | 0.069 | 0.014 | 3.61E-07 | -0.006 | 0.011 | 0.570 |
| Interleukin-13 levels | rs11251952 | A | G | 21.60 | -0.185 | 0.040 | 3.36E-06 | 0.036 | 0.041 | 0.380 |
| Interleukin-13 levels | rs12146346 | T | G | 22.42 | 0.073 | 0.016 | 2.19E-06 | -0.010 | 0.011 | 0.360 |
| Interleukin-13 levels | rs13119159 | A | G | 31.34 | 0.074 | 0.013 | 2.16E-08 | -0.004 | 0.011 | 0.720 |
| Interleukin-13 levels | rs141726773 | T | C | 22.02 | 0.209 | 0.045 | 2.69E-06 | -0.010 | 0.041 | 0.810 |
| Interleukin-13 levels | rs55924857 | T | C | 26.05 | -0.093 | 0.018 | 3.33E-07 | -0.010 | 0.015 | 0.520 |
| Interleukin-13 levels | rs59235092 | A | G | 23.36 | 0.212 | 0.044 | 1.34E-06 | 0.028 | 0.038 | 0.450 |
| Interleukin-13 levels | rs76219628 | A | G | 22.41 | 0.169 | 0.036 | 2.20E-06 | -0.002 | 0.028 | 0.940 |
| Interleukin-13 levels | rs9881117 | A | G | 21.65 | -0.066 | 0.014 | 3.28E-06 | 0.022 | 0.012 | 0.070 |
| Interleukin-15 receptor subunit alpha levels | rs117428573 | A | C | 20.97 | -0.313 | 0.068 | 4.67E-06 | 0.027 | 0.048 | 0.580 |
| Interleukin-15 receptor subunit alpha levels | rs145793996 | A | G | 21.44 | -0.228 | 0.049 | 3.66E-06 | -0.105 | 0.039 | 0.008 |
| Interleukin-15 receptor subunit alpha levels | rs2228059 | T | G | 845.12 | 0.369 | 0.013 | 8.39E-186 | 0.001 | 0.011 | 0.910 |
| Interleukin-15 receptor subunit alpha levels | rs2836464 | A | G | 22.18 | 0.080 | 0.017 | 2.48E-06 | 0.008 | 0.014 | 0.560 |
| Interleukin-15 receptor subunit alpha levels | rs4459616 | T | C | 22.68 | 0.140 | 0.029 | 1.92E-06 | -0.013 | 0.022 | 0.550 |
| Interleukin-15 receptor subunit alpha levels | rs56240706 | A | T | 22.67 | 0.092 | 0.019 | 1.92E-06 | -0.009 | 0.015 | 0.560 |
| Interleukin-15 receptor subunit alpha levels | rs649129 | T | C | 21.11 | -0.073 | 0.016 | 4.33E-06 | 0.000 | 0.013 | 0.980 |
| Interleukin-15 receptor subunit alpha levels | rs6845172 | C | G | 23.06 | 0.078 | 0.016 | 1.57E-06 | -0.004 | 0.014 | 0.770 |
| Interleukin-15 receptor subunit alpha levels | rs7898286 | T | G | 212.30 | -0.197 | 0.014 | 4.34E-48 | -0.021 | 0.011 | 0.056 |
| Interleukin-15 receptor subunit alpha levels | rs9270551 | A | G | 23.97 | 0.075 | 0.015 | 9.81E-07 | -0.077 | 0.012 | 0.000 |
| Interleukin-17A levels | rs115193412 | T | C | 23.39 | 0.169 | 0.035 | 1.32E-06 | -0.002 | 0.031 | 0.940 |
| Interleukin-17A levels | rs12599620 | T | C | 22.52 | -0.073 | 0.015 | 2.08E-06 | 0.020 | 0.013 | 0.110 |
| Interleukin-17A levels | rs1462017 | C | G | 27.59 | -0.089 | 0.017 | 1.50E-07 | 0.000 | 0.014 | 0.980 |
| Interleukin-17A levels | rs17448036 | A | G | 20.89 | -0.059 | 0.013 | 4.87E-06 | 0.023 | 0.011 | 0.034 |
| Interleukin-17A levels | rs2429911 | T | C | 22.57 | 0.231 | 0.049 | 2.02E-06 | 0.055 | 0.037 | 0.140 |
| Interleukin-17A levels | rs28852438 | A | G | 21.11 | -0.068 | 0.015 | 4.34E-06 | 0.009 | 0.012 | 0.450 |
| Interleukin-17A levels | rs33998516 | A | C | 23.91 | -0.080 | 0.016 | 1.01E-06 | -0.008 | 0.014 | 0.570 |
| Interleukin-17A levels | rs34557923 | T | G | 22.38 | 0.245 | 0.052 | 2.23E-06 | 0.063 | 0.045 | 0.160 |
| Interleukin-17A levels | rs4877075 | A | G | 22.37 | 0.091 | 0.019 | 2.25E-06 | -0.014 | 0.016 | 0.360 |
| Interleukin-17A levels | rs75788494 | T | C | 21.46 | -0.243 | 0.053 | 3.61E-06 | 0.004 | 0.037 | 0.920 |
| Interleukin-17A levels | rs77529534 | T | C | 22.11 | -0.128 | 0.027 | 2.57E-06 | 0.018 | 0.025 | 0.460 |
| Interleukin-17A levels | rs77595989 | T | G | 20.90 | 0.170 | 0.037 | 4.84E-06 | 0.057 | 0.033 | 0.085 |
| Interleukin-17A levels | rs79982350 | C | G | 24.73 | -0.147 | 0.030 | 6.60E-07 | -0.016 | 0.026 | 0.540 |
| Interleukin-17C levels | rs10870773 | A | G | 22.77 | -0.082 | 0.017 | 1.82E-06 | 0.013 | 0.015 | 0.390 |
| Interleukin-17C levels | rs114882743 | A | T | 35.37 | -0.326 | 0.055 | 2.73E-09 | -0.040 | 0.044 | 0.370 |
| Interleukin-17C levels | rs12092228 | T | G | 21.27 | 0.151 | 0.033 | 4.00E-06 | -0.001 | 0.025 | 0.980 |
| Interleukin-17C levels | rs12445031 | C | G | 21.30 | -0.090 | 0.020 | 3.92E-06 | 0.012 | 0.015 | 0.420 |
| Interleukin-17C levels | rs12863903 | T | C | 22.67 | -0.086 | 0.018 | 1.93E-06 | -0.004 | 0.015 | 0.780 |
| Interleukin-17C levels | rs12895022 | T | C | 21.37 | 0.109 | 0.024 | 3.78E-06 | -0.014 | 0.020 | 0.470 |
| Interleukin-17C levels | rs149756404 | A | C | 27.52 | -0.275 | 0.052 | 1.55E-07 | 0.018 | 0.038 | 0.640 |
| Interleukin-17C levels | rs17700884 | T | G | 59.61 | -0.105 | 0.014 | 1.16E-14 | -0.002 | 0.011 | 0.890 |
| Interleukin-17C levels | rs1920106 | T | C | 23.00 | 0.063 | 0.013 | 1.62E-06 | 0.002 | 0.011 | 0.860 |
| Interleukin-17C levels | rs2814092 | C | G | 21.36 | 0.062 | 0.014 | 3.80E-06 | 0.024 | 0.011 | 0.034 |
| Interleukin-17C levels | rs39779 | C | G | 22.51 | 0.108 | 0.023 | 2.09E-06 | -0.042 | 0.020 | 0.035 |
| Interleukin-17C levels | rs4593271 | A | G | 22.55 | -0.079 | 0.017 | 2.05E-06 | -0.003 | 0.011 | 0.760 |
| Interleukin-17C levels | rs554604740 | A | G | 23.07 | 0.193 | 0.040 | 1.56E-06 | 0.008 | 0.033 | 0.800 |
| Interleukin-17C levels | rs59356989 | A | G | 24.83 | -0.088 | 0.018 | 6.26E-07 | -0.005 | 0.015 | 0.760 |
| Interleukin-17C levels | rs72815428 | T | C | 20.89 | -0.167 | 0.037 | 4.85E-06 | 0.013 | 0.028 | 0.650 |
| Interleukin-17C levels | rs75246422 | T | C | 22.39 | -0.095 | 0.020 | 2.23E-06 | -0.003 | 0.017 | 0.850 |
| Interleukin-17C levels | rs77654242 | T | G | 21.49 | -0.217 | 0.047 | 3.56E-06 | -0.122 | 0.038 | 0.001 |
| Interleukin-17C levels | rs8015296 | C | G | 21.09 | -0.116 | 0.025 | 4.37E-06 | 0.016 | 0.017 | 0.350 |
| Interleukin-18 levels | rs112338272 | A | C | 21.14 | -0.195 | 0.043 | 4.27E-06 | -0.056 | 0.037 | 0.130 |
| Interleukin-18 levels | rs113552426 | C | G | 22.89 | -0.278 | 0.058 | 1.71E-06 | 0.075 | 0.057 | 0.180 |
| Interleukin-18 levels | rs11605127 | C | G | 21.08 | -0.063 | 0.014 | 4.41E-06 | 0.006 | 0.013 | 0.620 |
| Interleukin-18 levels | rs12201187 | A | T | 24.00 | 0.068 | 0.014 | 9.65E-07 | 0.004 | 0.013 | 0.740 |
| Interleukin-18 levels | rs12648080 | A | G | 24.32 | 0.072 | 0.015 | 8.16E-07 | 0.018 | 0.014 | 0.200 |
| Interleukin-18 levels | rs12681624 | C | G | 35.47 | -0.094 | 0.016 | 2.59E-09 | -0.002 | 0.015 | 0.910 |
| Interleukin-18 levels | rs12711729 | T | C | 21.05 | -0.070 | 0.015 | 4.47E-06 | -0.008 | 0.013 | 0.540 |
| Interleukin-18 levels | rs139760701 | A | T | 25.48 | -0.305 | 0.060 | 4.46E-07 | -0.065 | 0.050 | 0.190 |
| Interleukin-18 levels | rs17229943 | A | C | 35.91 | -0.160 | 0.027 | 2.07E-09 | 0.001 | 0.025 | 0.960 |
| Interleukin-18 levels | rs2108621 | T | C | 21.26 | 0.058 | 0.013 | 4.01E-06 | 0.018 | 0.011 | 0.110 |
| Interleukin-18 levels | rs35495214 | T | C | 22.29 | 0.137 | 0.029 | 2.34E-06 | -0.036 | 0.026 | 0.160 |
| Interleukin-18 levels | rs385076 | T | C | 227.94 | -0.186 | 0.012 | 1.68E-51 | 0.017 | 0.011 | 0.130 |
| Interleukin-18 levels | rs4140444 | A | G | 21.89 | 0.216 | 0.046 | 2.88E-06 | -0.029 | 0.050 | 0.560 |
| Interleukin-18 levels | rs56836641 | T | C | 29.33 | -0.163 | 0.030 | 6.12E-08 | 0.029 | 0.028 | 0.320 |
| Interleukin-18 levels | rs5744249 | A | C | 228.12 | 0.204 | 0.014 | 1.53E-51 | -0.008 | 0.012 | 0.510 |
| Interleukin-18 levels | rs60235102 | T | C | 26.31 | 0.115 | 0.023 | 2.91E-07 | -0.013 | 0.022 | 0.550 |
| Interleukin-18 levels | rs77994606 | A | G | 24.03 | -0.231 | 0.047 | 9.46E-07 | 0.035 | 0.043 | 0.420 |
| interleukin-18 receptor 1 levels | rs10192157 | T | C | 1024.56 | -0.368 | 0.012 | 1.00E-200 | 0.015 | 0.011 | 0.170 |
| interleukin-18 receptor 1 levels | rs1115282 | T | C | 167.65 | 0.149 | 0.012 | 2.42E-38 | -0.006 | 0.011 | 0.580 |
| interleukin-18 receptor 1 levels | rs114429030 | T | C | 36.39 | 0.184 | 0.031 | 1.61E-09 | 0.015 | 0.033 | 0.640 |
| interleukin-18 receptor 1 levels | rs116935210 | A | G | 21.74 | 0.239 | 0.051 | 3.13E-06 | -0.069 | 0.045 | 0.130 |
| interleukin-18 receptor 1 levels | rs117195704 | A | G | 23.12 | -0.151 | 0.031 | 1.52E-06 | 0.014 | 0.028 | 0.620 |
| interleukin-18 receptor 1 levels | rs117599131 | A | C | 21.89 | -0.148 | 0.032 | 2.89E-06 | 0.032 | 0.029 | 0.270 |
| interleukin-18 receptor 1 levels | rs28929474 | T | C | 35.28 | 0.264 | 0.045 | 2.86E-09 | 0.067 | 0.038 | 0.077 |
| interleukin-18 receptor 1 levels | rs34174304 | A | G | 24.00 | 0.073 | 0.015 | 9.62E-07 | -0.032 | 0.014 | 0.018 |
| interleukin-18 receptor 1 levels | rs35021151 | A | G | 23.16 | -0.165 | 0.034 | 1.49E-06 | 0.013 | 0.032 | 0.670 |
| interleukin-18 receptor 1 levels | rs62257659 | A | G | 23.02 | -0.202 | 0.042 | 1.61E-06 | -0.061 | 0.031 | 0.052 |
| interleukin-18 receptor 1 levels | rs73176827 | T | C | 22.56 | -0.105 | 0.022 | 2.03E-06 | -0.048 | 0.021 | 0.023 |
| interleukin-18 receptor 1 levels | rs7512350 | A | G | 21.00 | 0.092 | 0.020 | 4.60E-06 | 0.019 | 0.017 | 0.260 |
| interleukin-18 receptor 1 levels | rs7642750 | A | C | 21.86 | 0.094 | 0.020 | 2.94E-06 | 0.003 | 0.016 | 0.870 |
| interleukin-18 receptor 1 levels | rs78035061 | A | C | 21.90 | 0.104 | 0.022 | 2.87E-06 | 0.018 | 0.021 | 0.390 |
| interleukin-18 receptor 1 levels | rs78199195 | A | G | 23.79 | -0.096 | 0.020 | 1.07E-06 | 0.006 | 0.018 | 0.750 |
| interleukin-18 receptor 1 levels | rs78357146 | A | G | 80.05 | -0.338 | 0.038 | 3.65E-19 | -0.028 | 0.031 | 0.380 |
| interleukin-18 receptor 1 levels | rs79097546 | T | C | 24.19 | -0.275 | 0.056 | 8.75E-07 | 0.045 | 0.054 | 0.400 |
| interleukin-18 receptor 1 levels | rs80317525 | A | G | 22.17 | 0.141 | 0.030 | 2.49E-06 | 0.028 | 0.025 | 0.270 |
| Interleukin-1-alpha levels | rs10233998 | T | G | 20.98 | 0.131 | 0.029 | 4.64E-06 | 0.002 | 0.023 | 0.920 |
| Interleukin-1-alpha levels | rs115494443 | A | G | 22.13 | 0.266 | 0.057 | 2.55E-06 | -0.029 | 0.050 | 0.560 |
| Interleukin-1-alpha levels | rs115602471 | T | C | 22.30 | 0.222 | 0.047 | 2.33E-06 | -0.035 | 0.036 | 0.340 |
| Interleukin-1-alpha levels | rs117537822 | T | C | 24.57 | 0.218 | 0.044 | 7.17E-07 | 0.033 | 0.037 | 0.380 |
| Interleukin-1-alpha levels | rs11759846 | A | G | 150.48 | -0.326 | 0.027 | 1.36E-34 | -0.104 | 0.027 | 0.000 |
| Interleukin-1-alpha levels | rs11878153 | A | G | 25.50 | 0.112 | 0.022 | 4.42E-07 | -0.022 | 0.019 | 0.260 |
| Interleukin-1-alpha levels | rs12047801 | T | C | 20.97 | 0.078 | 0.017 | 4.67E-06 | -0.016 | 0.015 | 0.270 |
| Interleukin-1-alpha levels | rs16886503 | A | T | 21.65 | 0.244 | 0.052 | 3.28E-06 | 0.037 | 0.043 | 0.390 |
| Interleukin-1-alpha levels | rs4767214 | T | C | 22.75 | 0.062 | 0.013 | 1.85E-06 | -0.003 | 0.011 | 0.810 |
| Interleukin-1-alpha levels | rs61098036 | A | G | 20.95 | -0.086 | 0.019 | 4.70E-06 | 0.011 | 0.014 | 0.430 |
| Interleukin-1-alpha levels | rs7138836 | A | T | 22.51 | -0.098 | 0.021 | 2.10E-06 | -0.038 | 0.019 | 0.043 |
| Interleukin-2 levels | rs10996419 | T | C | 22.26 | -0.122 | 0.026 | 2.38E-06 | 0.021 | 0.024 | 0.380 |
| Interleukin-2 levels | rs142641125 | T | C | 25.00 | 0.210 | 0.042 | 5.73E-07 | 0.019 | 0.039 | 0.610 |
| Interleukin-2 levels | rs1671226 | C | G | 24.94 | -0.085 | 0.017 | 5.91E-07 | 0.014 | 0.013 | 0.280 |
| Interleukin-2 levels | rs201229721 | A | C | 22.57 | -0.147 | 0.031 | 2.03E-06 | -0.019 | 0.023 | 0.410 |
| Interleukin-2 levels | rs28515912 | A | C | 23.55 | -0.072 | 0.015 | 1.22E-06 | 0.000 | 0.012 | 0.990 |
| Interleukin-2 levels | rs36006983 | T | C | 22.64 | -0.073 | 0.015 | 1.95E-06 | -0.009 | 0.012 | 0.450 |
| Interleukin-2 levels | rs4703508 | T | C | 21.87 | -0.122 | 0.026 | 2.91E-06 | 0.005 | 0.021 | 0.810 |
| Interleukin-2 levels | rs6535212 | T | G | 21.60 | -0.065 | 0.014 | 3.36E-06 | -0.007 | 0.012 | 0.560 |
| Interleukin-2 levels | rs74852566 | T | G | 21.51 | -0.200 | 0.043 | 3.52E-06 | 0.001 | 0.039 | 0.990 |
| Interleukin-2 levels | rs75739108 | T | C | 20.89 | 0.174 | 0.038 | 4.85E-06 | 0.031 | 0.033 | 0.340 |
| Interleukin-2 levels | rs7638939 | A | T | 24.09 | 0.085 | 0.017 | 9.20E-07 | -0.028 | 0.015 | 0.054 |
| Interleukin-2 levels | rs77832761 | A | G | 21.55 | 0.192 | 0.041 | 3.44E-06 | -0.068 | 0.036 | 0.058 |
| Interleukin-2 levels | rs77853517 | T | C | 23.32 | -0.105 | 0.022 | 1.37E-06 | 0.060 | 0.020 | 0.002 |
| Interleukin-2 levels | rs79419497 | A | G | 22.61 | 0.202 | 0.042 | 1.99E-06 | -0.027 | 0.033 | 0.420 |
| Interleukin-2 levels | rs79925007 | T | G | 21.27 | 0.118 | 0.026 | 3.99E-06 | -0.024 | 0.018 | 0.190 |
| Interleukin-2 receptor subunit beta levels | rs115890206 | A | G | 21.36 | 0.232 | 0.050 | 3.81E-06 | 0.007 | 0.037 | 0.840 |
| Interleukin-2 receptor subunit beta levels | rs116007066 | A | G | 22.70 | -0.210 | 0.044 | 1.90E-06 | 0.009 | 0.037 | 0.800 |
| Interleukin-2 receptor subunit beta levels | rs11630708 | T | C | 22.51 | -0.210 | 0.044 | 2.09E-06 | 0.085 | 0.040 | 0.034 |
| Interleukin-2 receptor subunit beta levels | rs117538197 | T | C | 21.60 | 0.121 | 0.026 | 3.36E-06 | 0.020 | 0.022 | 0.360 |
| Interleukin-2 receptor subunit beta levels | rs141460846 | T | C | 21.33 | -0.247 | 0.054 | 3.86E-06 | 0.031 | 0.040 | 0.430 |
| Interleukin-2 receptor subunit beta levels | rs1472270 | C | G | 23.90 | 0.070 | 0.014 | 1.01E-06 | -0.010 | 0.012 | 0.400 |
| Interleukin-2 receptor subunit beta levels | rs2157876 | T | G | 22.47 | -0.113 | 0.024 | 2.13E-06 | -0.023 | 0.020 | 0.250 |
| Interleukin-2 receptor subunit beta levels | rs34246740 | T | C | 21.36 | -0.072 | 0.016 | 3.80E-06 | 0.016 | 0.012 | 0.190 |
| Interleukin-2 receptor subunit beta levels | rs9321271 | A | C | 23.34 | -0.157 | 0.033 | 1.36E-06 | -0.040 | 0.026 | 0.130 |
| Interleukin-2 receptor subunit beta levels | rs9921181 | A | G | 22.41 | -0.061 | 0.013 | 2.20E-06 | -0.002 | 0.011 | 0.830 |
| Interleukin-20 levels | rs111249483 | A | G | 24.33 | 0.294 | 0.060 | 8.10E-07 | -0.005 | 0.047 | 0.920 |
| Interleukin-20 levels | rs114209791 | A | G | 21.52 | -0.213 | 0.046 | 3.50E-06 | -0.018 | 0.036 | 0.620 |
| Interleukin-20 levels | rs114363239 | T | C | 23.72 | -0.237 | 0.049 | 1.11E-06 | -0.044 | 0.041 | 0.280 |
| Interleukin-20 levels | rs117977288 | T | G | 23.94 | -0.155 | 0.032 | 9.96E-07 | -0.020 | 0.025 | 0.410 |
| Interleukin-20 levels | rs12498781 | A | G | 21.48 | 0.064 | 0.014 | 3.57E-06 | 0.003 | 0.012 | 0.810 |
| Interleukin-20 levels | rs143181662 | T | C | 21.24 | 0.072 | 0.016 | 4.05E-06 | -0.027 | 0.011 | 0.012 |
| Interleukin-20 levels | rs146918864 | T | C | 24.54 | -0.255 | 0.052 | 7.29E-07 | 0.007 | 0.051 | 0.890 |
| Interleukin-20 levels | rs188205021 | T | C | 27.03 | -0.222 | 0.043 | 2.00E-07 | -0.018 | 0.035 | 0.610 |
| Interleukin-20 levels | rs28542561 | T | C | 22.21 | -0.175 | 0.037 | 2.45E-06 | -0.019 | 0.030 | 0.530 |
| Interleukin-20 levels | rs72633862 | T | G | 20.97 | -0.172 | 0.038 | 4.65E-06 | 0.012 | 0.032 | 0.700 |
| Interleukin-20 receptor subunit alpha levels | rs113153423 | A | G | 22.09 | 0.191 | 0.041 | 2.60E-06 | 0.001 | 0.031 | 0.970 |
| Interleukin-20 receptor subunit alpha levels | rs11987533 | A | G | 34.98 | 0.117 | 0.020 | 3.34E-09 | -0.025 | 0.016 | 0.120 |
| Interleukin-20 receptor subunit alpha levels | rs12056343 | T | G | 21.02 | -0.076 | 0.017 | 4.55E-06 | 0.011 | 0.013 | 0.370 |
| Interleukin-20 receptor subunit alpha levels | rs149111746 | A | G | 21.28 | 0.236 | 0.051 | 3.98E-06 | 0.011 | 0.045 | 0.810 |
| Interleukin-20 receptor subunit alpha levels | rs59446445 | A | G | 20.99 | 0.174 | 0.038 | 4.61E-06 | -0.009 | 0.032 | 0.770 |
| Interleukin-20 receptor subunit alpha levels | rs6920753 | A | G | 21.26 | -0.066 | 0.014 | 4.01E-06 | 0.003 | 0.012 | 0.790 |
| Interleukin-22 receptor subunit alpha-1 levels | rs12240324 | A | G | 21.97 | 0.220 | 0.047 | 2.77E-06 | -0.115 | 0.047 | 0.015 |
| Interleukin-22 receptor subunit alpha-1 levels | rs13257574 | T | C | 21.60 | 0.271 | 0.058 | 3.36E-06 | -0.053 | 0.046 | 0.260 |
| Interleukin-22 receptor subunit alpha-1 levels | rs1473089 | A | C | 22.80 | 0.268 | 0.056 | 1.79E-06 | -0.011 | 0.052 | 0.830 |
| Interleukin-22 receptor subunit alpha-1 levels | rs17256492 | T | C | 21.49 | -0.075 | 0.016 | 3.56E-06 | -0.006 | 0.013 | 0.660 |
| Interleukin-22 receptor subunit alpha-1 levels | rs3181361 | T | C | 21.52 | 0.270 | 0.058 | 3.50E-06 | 0.086 | 0.042 | 0.042 |
| Interleukin-22 receptor subunit alpha-1 levels | rs4811167 | T | C | 22.24 | 0.063 | 0.013 | 2.40E-06 | 0.007 | 0.011 | 0.500 |
| Interleukin-22 receptor subunit alpha-1 levels | rs56282088 | A | G | 24.30 | 0.282 | 0.057 | 8.23E-07 | -0.058 | 0.044 | 0.190 |
| Interleukin-22 receptor subunit alpha-1 levels | rs7158900 | A | G | 23.85 | -0.067 | 0.014 | 1.04E-06 | -0.001 | 0.011 | 0.900 |
| Interleukin-22 receptor subunit alpha-1 levels | rs75590335 | A | G | 21.66 | 0.172 | 0.037 | 3.25E-06 | -0.018 | 0.029 | 0.540 |
| Interleukin-22 receptor subunit alpha-1 levels | rs78594373 | T | C | 21.68 | -0.127 | 0.027 | 3.23E-06 | -0.006 | 0.021 | 0.770 |
| Interleukin-22 receptor subunit alpha-1 levels | rs79229049 | A | T | 26.03 | -0.210 | 0.041 | 3.36E-07 | 0.022 | 0.033 | 0.510 |
| Interleukin-24 levels | rs11066309 | A | G | 22.86 | 0.066 | 0.014 | 1.74E-06 | -0.026 | 0.011 | 0.018 |
| Interleukin-24 levels | rs11256610 | A | G | 21.98 | 0.301 | 0.064 | 2.76E-06 | -0.098 | 0.056 | 0.081 |
| Interleukin-24 levels | rs117613902 | A | G | 20.85 | -0.300 | 0.066 | 4.97E-06 | 0.008 | 0.053 | 0.880 |
| Interleukin-24 levels | rs143986178 | A | G | 21.25 | 0.297 | 0.064 | 4.02E-06 | -0.029 | 0.052 | 0.580 |
| Interleukin-24 levels | rs145295031 | A | T | 22.41 | 0.306 | 0.065 | 2.20E-06 | 0.027 | 0.044 | 0.530 |
| Interleukin-24 levels | rs167018 | A | G | 23.34 | 0.066 | 0.014 | 1.36E-06 | 0.007 | 0.011 | 0.540 |
| Interleukin-24 levels | rs2341294 | A | G | 22.16 | -0.132 | 0.028 | 2.51E-06 | 0.010 | 0.022 | 0.650 |
| Interleukin-24 levels | rs60306270 | A | G | 21.52 | -0.089 | 0.019 | 3.51E-06 | 0.004 | 0.016 | 0.820 |
| Interleukin-24 levels | rs73169406 | A | G | 28.75 | 0.111 | 0.021 | 8.22E-08 | -0.002 | 0.017 | 0.910 |
| Interleukin-33 levels | rs1013434 | T | C | 21.46 | -0.073 | 0.016 | 3.61E-06 | 0.003 | 0.013 | 0.820 |
| Interleukin-33 levels | rs10415966 | A | C | 25.82 | -0.118 | 0.023 | 3.74E-07 | -0.013 | 0.018 | 0.460 |
| Interleukin-33 levels | rs13336496 | A | C | 21.26 | 0.094 | 0.020 | 4.01E-06 | -0.020 | 0.016 | 0.190 |
| Interleukin-33 levels | rs17149396 | C | G | 21.00 | 0.183 | 0.040 | 4.59E-06 | -0.014 | 0.036 | 0.710 |
| Interleukin-33 levels | rs66755903 | A | G | 21.55 | -0.075 | 0.016 | 3.45E-06 | 0.020 | 0.013 | 0.130 |
| Interleukin-33 levels | rs7742625 | C | G | 21.80 | 0.069 | 0.015 | 3.03E-06 | 0.018 | 0.012 | 0.140 |
| Interleukin-33 levels | rs77792454 | T | C | 20.91 | -0.117 | 0.026 | 4.82E-06 | -0.010 | 0.016 | 0.540 |
| Interleukin-33 levels | rs78455659 | A | G | 21.27 | 0.126 | 0.027 | 3.99E-06 | 0.038 | 0.026 | 0.140 |
| Interleukin-33 levels | rs8042883 | T | C | 25.45 | -0.068 | 0.014 | 4.55E-07 | 0.003 | 0.011 | 0.780 |
| Interleukin-4 levels | rs10910814 | C | G | 21.18 | 0.192 | 0.042 | 4.19E-06 | -0.019 | 0.027 | 0.500 |
| Interleukin-4 levels | rs116963481 | A | G | 22.45 | 0.281 | 0.059 | 2.16E-06 | 0.020 | 0.049 | 0.690 |
| Interleukin-4 levels | rs11989681 | A | G | 24.85 | 0.068 | 0.014 | 6.19E-07 | -0.029 | 0.011 | 0.009 |
| Interleukin-4 levels | rs12641440 | C | G | 22.32 | -0.118 | 0.025 | 2.31E-06 | 0.012 | 0.022 | 0.570 |
| Interleukin-4 levels | rs13130198 | A | G | 23.64 | -0.077 | 0.016 | 1.16E-06 | 0.022 | 0.013 | 0.092 |
| Interleukin-4 levels | rs13418255 | A | G | 20.99 | 0.070 | 0.015 | 4.61E-06 | -0.018 | 0.012 | 0.160 |
| Interleukin-4 levels | rs1490743 | T | G | 23.16 | -0.134 | 0.028 | 1.49E-06 | -0.017 | 0.022 | 0.430 |
| Interleukin-4 levels | rs2502347 | T | C | 21.26 | -0.077 | 0.017 | 4.01E-06 | 0.013 | 0.013 | 0.320 |
| Interleukin-4 levels | rs4876407 | T | G | 21.64 | -0.139 | 0.030 | 3.28E-06 | 0.009 | 0.026 | 0.720 |
| Interleukin-4 levels | rs75610895 | T | C | 27.36 | -0.235 | 0.045 | 1.68E-07 | -0.028 | 0.034 | 0.410 |
| Interleukin-4 levels | rs9270229 | T | C | 22.59 | 0.121 | 0.026 | 2.00E-06 | -0.005 | 0.015 | 0.750 |
| Interleukin-5 levels | rs10988407 | A | G | 21.65 | 0.078 | 0.017 | 3.28E-06 | 0.005 | 0.013 | 0.700 |
| Interleukin-5 levels | rs114829303 | T | C | 21.17 | 0.166 | 0.036 | 4.20E-06 | -0.059 | 0.033 | 0.073 |
| Interleukin-5 levels | rs12592185 | T | C | 23.46 | 0.084 | 0.017 | 1.27E-06 | 0.007 | 0.014 | 0.640 |
| Interleukin-5 levels | rs132210 | T | C | 23.67 | -0.069 | 0.014 | 1.14E-06 | 0.024 | 0.012 | 0.040 |
| Interleukin-5 levels | rs17009223 | A | G | 24.54 | -0.117 | 0.024 | 7.29E-07 | -0.020 | 0.020 | 0.320 |
| Interleukin-5 levels | rs34639000 | A | G | 27.08 | 0.077 | 0.015 | 1.95E-07 | -0.010 | 0.013 | 0.420 |
| Interleukin-5 levels | rs4277106 | A | G | 21.53 | -0.275 | 0.059 | 3.48E-06 | 0.000 | 0.043 | 0.990 |
| Interleukin-5 levels | rs62069649 | A | G | 20.95 | 0.221 | 0.048 | 4.72E-06 | -0.043 | 0.035 | 0.220 |
| Interleukin-5 levels | rs7142197 | A | G | 24.16 | -0.092 | 0.019 | 8.88E-07 | 0.002 | 0.015 | 0.910 |
| Interleukin-6 levels | rs10234370 | T | C | 21.00 | 0.058 | 0.013 | 4.59E-06 | -0.004 | 0.012 | 0.700 |
| Interleukin-6 levels | rs1346147 | A | G | 23.83 | -0.066 | 0.014 | 1.05E-06 | 0.008 | 0.013 | 0.530 |
| Interleukin-6 levels | rs17486819 | T | G | 21.35 | 0.098 | 0.021 | 3.82E-06 | 0.004 | 0.020 | 0.840 |
| Interleukin-6 levels | rs187416244 | T | C | 22.89 | -0.224 | 0.047 | 1.71E-06 | 0.050 | 0.043 | 0.240 |
| Interleukin-6 levels | rs2228145 | A | C | 200.26 | -0.168 | 0.012 | 1.83E-45 | 0.001 | 0.011 | 0.960 |
| Interleukin-6 levels | rs248536 | T | G | 22.02 | -0.067 | 0.014 | 2.70E-06 | -0.006 | 0.013 | 0.670 |
| Interleukin-7 levels | rs10403201 | A | G | 21.15 | -0.058 | 0.013 | 4.26E-06 | 0.011 | 0.012 | 0.350 |
| Interleukin-7 levels | rs112359206 | A | G | 56.48 | 0.169 | 0.023 | 5.67E-14 | 0.020 | 0.019 | 0.280 |
| Interleukin-7 levels | rs11742240 | T | G | 24.39 | -0.065 | 0.013 | 7.86E-07 | 0.041 | 0.012 | 0.001 |
| Interleukin-7 levels | rs12321566 | A | G | 25.22 | 0.070 | 0.014 | 5.12E-07 | -0.011 | 0.013 | 0.380 |
| Interleukin-7 levels | rs12699881 | A | G | 24.28 | 0.068 | 0.014 | 8.33E-07 | 0.012 | 0.013 | 0.340 |
| Interleukin-7 levels | rs144728120 | T | C | 22.38 | 0.150 | 0.032 | 2.23E-06 | 0.021 | 0.028 | 0.460 |
| Interleukin-7 levels | rs55849454 | A | G | 21.02 | 0.073 | 0.016 | 4.54E-06 | -0.006 | 0.013 | 0.670 |
| Interleukin-7 levels | rs56889120 | A | G | 21.34 | 0.097 | 0.021 | 3.86E-06 | 0.020 | 0.017 | 0.260 |
| Interleukin-7 levels | rs570880779 | T | C | 21.40 | -0.234 | 0.051 | 3.73E-06 | -0.045 | 0.047 | 0.340 |
| Interleukin-7 levels | rs576004227 | A | T | 21.43 | 0.160 | 0.035 | 3.67E-06 | 0.026 | 0.025 | 0.300 |
| Interleukin-7 levels | rs74131483 | A | G | 25.07 | 0.137 | 0.027 | 5.52E-07 | -0.015 | 0.022 | 0.500 |
| Interleukin-7 levels | rs77336315 | A | C | 22.38 | 0.251 | 0.053 | 2.24E-06 | 0.088 | 0.052 | 0.093 |
| Interleukin-7 levels | rs79072837 | T | C | 23.59 | -0.136 | 0.028 | 1.19E-06 | 0.020 | 0.027 | 0.450 |
| Interleukin-8 levels | rs12075 | A | G | 33.06 | 0.067 | 0.012 | 8.92E-09 | -0.007 | 0.011 | 0.520 |
| Interleukin-8 levels | rs12188297 | A | T | 26.38 | -0.076 | 0.015 | 2.81E-07 | -0.001 | 0.014 | 0.920 |
| Interleukin-8 levels | rs13064825 | T | C | 21.78 | 0.056 | 0.012 | 3.06E-06 | -0.020 | 0.011 | 0.084 |
| Interleukin-8 levels | rs141979722 | T | C | 21.65 | 0.283 | 0.061 | 3.27E-06 | -0.078 | 0.050 | 0.120 |
| Interleukin-8 levels | rs145125644 | A | G | 23.44 | 0.269 | 0.056 | 1.29E-06 | 0.023 | 0.055 | 0.680 |
| Interleukin-8 levels | rs1516478 | T | C | 21.10 | 0.148 | 0.032 | 4.37E-06 | 0.022 | 0.032 | 0.490 |
| Interleukin-8 levels | rs34519991 | T | C | 21.39 | 0.056 | 0.012 | 3.75E-06 | 0.007 | 0.011 | 0.520 |
| Interleukin-8 levels | rs6446951 | A | G | 61.76 | -0.189 | 0.024 | 3.87E-15 | 0.018 | 0.023 | 0.450 |
| Interleukin-8 levels | rs6585420 | T | C | 22.60 | 0.155 | 0.033 | 2.00E-06 | -0.029 | 0.034 | 0.390 |
| Interleukin-8 levels | rs6709159 | A | G | 23.07 | 0.056 | 0.012 | 1.56E-06 | 0.010 | 0.011 | 0.360 |
| Interleukin-8 levels | rs7216538 | A | G | 22.52 | -0.132 | 0.028 | 2.08E-06 | -0.037 | 0.024 | 0.130 |
| Interleukin-8 levels | rs72633250 | A | C | 21.43 | 0.057 | 0.012 | 3.67E-06 | 0.000 | 0.011 | 1.000 |
| Interleukin-8 levels | rs8069322 | A | G | 26.00 | 0.067 | 0.013 | 3.41E-07 | 0.000 | 0.012 | 0.980 |
| Interleukin-8 levels | rs906401 | T | C | 22.14 | 0.094 | 0.020 | 2.54E-06 | 0.005 | 0.018 | 0.800 |
| Latency-associated peptide transforming growth factor beta 1 levels | rs10403201 | A | G | 22.81 | -0.060 | 0.013 | 1.79E-06 | 0.011 | 0.012 | 0.350 |
| Latency-associated peptide transforming growth factor beta 1 levels | rs10508556 | T | C | 21.05 | 0.052 | 0.011 | 4.48E-06 | -0.006 | 0.011 | 0.610 |
| Latency-associated peptide transforming growth factor beta 1 levels | rs114152855 | T | C | 23.79 | -0.299 | 0.061 | 1.07E-06 | -0.123 | 0.054 | 0.023 |
| Latency-associated peptide transforming growth factor beta 1 levels | rs143420877 | T | C | 22.81 | 0.145 | 0.030 | 1.79E-06 | -0.006 | 0.030 | 0.830 |
| Latency-associated peptide transforming growth factor beta 1 levels | rs144834546 | T | C | 25.61 | -0.266 | 0.053 | 4.17E-07 | -0.073 | 0.040 | 0.069 |
| Latency-associated peptide transforming growth factor beta 1 levels | rs149458216 | A | C | 23.77 | -0.230 | 0.047 | 1.09E-06 | 0.037 | 0.042 | 0.380 |
| Latency-associated peptide transforming growth factor beta 1 levels | rs1800472 | A | G | 190.44 | -0.462 | 0.034 | 2.55E-43 | -0.001 | 0.038 | 0.970 |
| Latency-associated peptide transforming growth factor beta 1 levels | rs183319799 | T | G | 22.46 | 0.219 | 0.046 | 2.14E-06 | -0.026 | 0.042 | 0.550 |
| Latency-associated peptide transforming growth factor beta 1 levels | rs1921885 | A | C | 23.14 | 0.127 | 0.026 | 1.51E-06 | -0.005 | 0.024 | 0.830 |
| Latency-associated peptide transforming growth factor beta 1 levels | rs2281119 | T | C | 21.11 | -0.087 | 0.019 | 4.33E-06 | -0.005 | 0.018 | 0.770 |
| Latency-associated peptide transforming growth factor beta 1 levels | rs2631367 | C | G | 21.66 | -0.061 | 0.013 | 3.26E-06 | 0.027 | 0.011 | 0.011 |
| Latency-associated peptide transforming growth factor beta 1 levels | rs34536806 | T | G | 22.18 | 0.099 | 0.021 | 2.48E-06 | 0.024 | 0.021 | 0.250 |
| Latency-associated peptide transforming growth factor beta 1 levels | rs34992551 | T | C | 21.89 | -0.093 | 0.020 | 2.89E-06 | -0.031 | 0.023 | 0.180 |
| Latency-associated peptide transforming growth factor beta 1 levels | rs7247630 | T | C | 25.86 | 0.138 | 0.027 | 3.68E-07 | 0.015 | 0.027 | 0.570 |
| Latency-associated peptide transforming growth factor beta 1 levels | rs73045256 | A | G | 48.44 | -0.192 | 0.028 | 3.40E-12 | -0.005 | 0.024 | 0.830 |
| Latency-associated peptide transforming growth factor beta 1 levels | rs7570818 | A | G | 21.52 | -0.085 | 0.018 | 3.50E-06 | -0.006 | 0.017 | 0.740 |
| Latency-associated peptide transforming growth factor beta 1 levels | rs7656674 | A | T | 26.77 | 0.063 | 0.012 | 2.30E-07 | -0.023 | 0.011 | 0.042 |
| Latency-associated peptide transforming growth factor beta 1 levels | rs7820135 | T | C | 23.23 | -0.075 | 0.016 | 1.44E-06 | 0.020 | 0.015 | 0.200 |
| Leukemia inhibitory factor levels | rs11608349 | A | T | 21.77 | -0.308 | 0.066 | 3.08E-06 | -0.010 | 0.052 | 0.850 |
| Leukemia inhibitory factor levels | rs11883375 | A | G | 26.34 | -0.101 | 0.020 | 2.87E-07 | -0.021 | 0.016 | 0.180 |
| Leukemia inhibitory factor levels | rs145344087 | C | G | 21.00 | 0.255 | 0.056 | 4.59E-06 | 0.015 | 0.038 | 0.700 |
| Leukemia inhibitory factor levels | rs234592 | A | G | 21.80 | -0.064 | 0.014 | 3.02E-06 | -0.003 | 0.011 | 0.820 |
| Leukemia inhibitory factor levels | rs332426 | A | G | 22.15 | 0.112 | 0.024 | 2.53E-06 | 0.018 | 0.018 | 0.310 |
| Leukemia inhibitory factor levels | rs74992559 | A | G | 22.09 | 0.173 | 0.037 | 2.60E-06 | 0.021 | 0.032 | 0.520 |
| Leukemia inhibitory factor levels | rs80092539 | A | T | 21.73 | 0.099 | 0.021 | 3.13E-06 | -0.009 | 0.016 | 0.570 |
| Leukemia inhibitory factor levels | rs825264 | A | G | 21.88 | -0.212 | 0.045 | 2.90E-06 | -0.012 | 0.043 | 0.780 |
| Leukemia inhibitory factor receptor levels | rs115938660 | T | C | 21.81 | -0.218 | 0.047 | 3.01E-06 | -0.023 | 0.052 | 0.650 |
| Leukemia inhibitory factor receptor levels | rs117117000 | A | G | 22.68 | 0.159 | 0.033 | 1.91E-06 | 0.028 | 0.030 | 0.340 |
| Leukemia inhibitory factor receptor levels | rs12754806 | A | G | 21.30 | 0.056 | 0.012 | 3.94E-06 | 0.005 | 0.011 | 0.660 |
| Leukemia inhibitory factor receptor levels | rs141933232 | A | G | 24.89 | -0.272 | 0.055 | 6.07E-07 | -0.034 | 0.047 | 0.470 |
| Leukemia inhibitory factor receptor levels | rs1690678 | A | C | 22.17 | 0.090 | 0.019 | 2.50E-06 | -0.001 | 0.017 | 0.960 |
| Leukemia inhibitory factor receptor levels | rs2289779 | T | G | 34.58 | 0.079 | 0.013 | 4.09E-09 | 0.002 | 0.011 | 0.880 |
| Leukemia inhibitory factor receptor levels | rs41307428 | T | C | 45.96 | 0.203 | 0.030 | 1.21E-11 | 0.002 | 0.041 | 0.960 |
| Leukemia inhibitory factor receptor levels | rs4937122 | T | G | 25.89 | 0.126 | 0.025 | 3.61E-07 | 0.021 | 0.021 | 0.320 |
| Leukemia inhibitory factor receptor levels | rs62258077 | T | C | 23.49 | -0.063 | 0.013 | 1.26E-06 | -0.007 | 0.011 | 0.550 |
| Leukemia inhibitory factor receptor levels | rs635634 | T | C | 355.56 | -0.289 | 0.015 | 2.61E-79 | -0.007 | 0.014 | 0.600 |
| Leukemia inhibitory factor receptor levels | rs72730728 | A | T | 21.92 | 0.141 | 0.030 | 2.84E-06 | -0.017 | 0.027 | 0.530 |
| Leukemia inhibitory factor receptor levels | rs72837682 | T | C | 21.63 | -0.080 | 0.017 | 3.30E-06 | 0.009 | 0.014 | 0.510 |
| Leukemia inhibitory factor receptor levels | rs73157388 | T | C | 21.00 | -0.131 | 0.029 | 4.60E-06 | 0.020 | 0.024 | 0.410 |
| Leukemia inhibitory factor receptor levels | rs9313148 | C | G | 22.69 | -0.082 | 0.017 | 1.91E-06 | 0.003 | 0.015 | 0.850 |
| Macrophage colony-stimulating factor 1 levels | rs10042665 | C | G | 22.84 | 0.058 | 0.012 | 1.76E-06 | -0.010 | 0.012 | 0.440 |
| Macrophage colony-stimulating factor 1 levels | rs115370595 | A | G | 21.07 | -0.228 | 0.050 | 4.42E-06 | -0.039 | 0.042 | 0.350 |
| Macrophage colony-stimulating factor 1 levels | rs116443177 | T | C | 22.85 | 0.083 | 0.017 | 1.75E-06 | 0.015 | 0.015 | 0.310 |
| Macrophage colony-stimulating factor 1 levels | rs11685487 | T | C | 23.20 | 0.094 | 0.020 | 1.46E-06 | 0.014 | 0.018 | 0.450 |
| Macrophage colony-stimulating factor 1 levels | rs117591817 | C | G | 20.91 | -0.199 | 0.044 | 4.82E-06 | 0.011 | 0.040 | 0.790 |
| Macrophage colony-stimulating factor 1 levels | rs1605333 | C | G | 23.49 | -0.060 | 0.012 | 1.25E-06 | -0.004 | 0.011 | 0.710 |
| Macrophage colony-stimulating factor 1 levels | rs17610659 | T | C | 203.67 | 0.168 | 0.012 | 3.31E-46 | 0.020 | 0.011 | 0.066 |
| Macrophage colony-stimulating factor 1 levels | rs17734417 | T | C | 21.37 | -0.123 | 0.027 | 3.79E-06 | 0.025 | 0.026 | 0.340 |
| Macrophage colony-stimulating factor 1 levels | rs563284470 | A | G | 29.38 | 0.209 | 0.039 | 5.93E-08 | -0.002 | 0.031 | 0.960 |
| Macrophage colony-stimulating factor 1 levels | rs7227917 | A | G | 22.22 | -0.087 | 0.019 | 2.43E-06 | 0.002 | 0.018 | 0.900 |
| Macrophage colony-stimulating factor 1 levels | rs72783071 | T | C | 23.10 | -0.199 | 0.041 | 1.53E-06 | -0.058 | 0.038 | 0.130 |
| Macrophage colony-stimulating factor 1 levels | rs74849049 | T | G | 20.88 | -0.091 | 0.020 | 4.88E-06 | -0.001 | 0.019 | 0.960 |
| Macrophage colony-stimulating factor 1 levels | rs7538029 | A | C | 22.06 | 0.078 | 0.017 | 2.64E-06 | 0.013 | 0.014 | 0.350 |
| Macrophage colony-stimulating factor 1 levels | rs75869070 | A | G | 23.19 | 0.115 | 0.024 | 1.47E-06 | 0.056 | 0.024 | 0.018 |
| Macrophage colony-stimulating factor 1 levels | rs76421506 | A | G | 21.45 | 0.078 | 0.017 | 3.64E-06 | 0.008 | 0.015 | 0.620 |
| Macrophage inflammatory protein 1a levels | rs1125560 | T | C | 26.97 | -0.064 | 0.012 | 2.06E-07 | -0.020 | 0.012 | 0.091 |
| Macrophage inflammatory protein 1a levels | rs113448118 | A | G | 20.88 | 0.082 | 0.018 | 4.88E-06 | -0.030 | 0.016 | 0.055 |
| Macrophage inflammatory protein 1a levels | rs1143687 | T | C | 26.22 | -0.123 | 0.024 | 3.04E-07 | -0.024 | 0.022 | 0.270 |
| Macrophage inflammatory protein 1a levels | rs1634518 | A | G | 917.87 | -0.409 | 0.014 | 1.00E-200 | -0.012 | 0.013 | 0.340 |
| Macrophage inflammatory protein 1a levels | rs2847249 | T | C | 20.85 | -0.062 | 0.014 | 4.97E-06 | 0.017 | 0.013 | 0.200 |
| Macrophage inflammatory protein 1a levels | rs2853926 | A | G | 20.90 | -0.061 | 0.013 | 4.84E-06 | -0.016 | 0.012 | 0.200 |
| Macrophage inflammatory protein 1a levels | rs56675286 | A | C | 30.88 | -0.181 | 0.033 | 2.75E-08 | -0.022 | 0.031 | 0.480 |
| Macrophage inflammatory protein 1a levels | rs677925 | T | C | 21.82 | -0.067 | 0.014 | 2.99E-06 | 0.001 | 0.012 | 0.930 |
| Macrophage inflammatory protein 1a levels | rs78871521 | T | C | 23.85 | 0.181 | 0.037 | 1.04E-06 | -0.053 | 0.032 | 0.095 |
| Macrophage inflammatory protein 1a levels | rs9540456 | A | G | 26.17 | 0.093 | 0.018 | 3.12E-07 | 0.007 | 0.016 | 0.670 |
| Macrophage inflammatory protein 1a levels | rs9911791 | A | G | 118.03 | 0.176 | 0.016 | 1.71E-27 | -0.009 | 0.015 | 0.540 |
| Matrix metalloproteinase-1 levels | rs10990535 | T | C | 27.12 | 0.070 | 0.014 | 1.91E-07 | -0.002 | 0.013 | 0.880 |
| Matrix metalloproteinase-1 levels | rs11673125 | T | C | 21.22 | -0.059 | 0.013 | 4.10E-06 | 0.011 | 0.012 | 0.370 |
| Matrix metalloproteinase-1 levels | rs116889819 | A | G | 34.42 | -0.176 | 0.030 | 4.45E-09 | 0.049 | 0.025 | 0.051 |
| Matrix metalloproteinase-1 levels | rs12141791 | A | G | 43.66 | 0.086 | 0.013 | 3.90E-11 | 0.005 | 0.012 | 0.670 |
| Matrix metalloproteinase-1 levels | rs12367368 | T | G | 21.43 | 0.086 | 0.019 | 3.67E-06 | 0.006 | 0.018 | 0.740 |
| Matrix metalloproteinase-1 levels | rs141782294 | A | G | 71.66 | 0.377 | 0.045 | 2.56E-17 | -0.041 | 0.051 | 0.420 |
| Matrix metalloproteinase-1 levels | rs188626385 | T | C | 22.41 | -0.251 | 0.053 | 2.20E-06 | 0.035 | 0.040 | 0.370 |
| Matrix metalloproteinase-1 levels | rs2155053 | T | C | 148.03 | -0.321 | 0.026 | 4.68E-34 | -0.016 | 0.023 | 0.490 |
| Matrix metalloproteinase-1 levels | rs2229629 | A | G | 21.95 | -0.315 | 0.067 | 2.80E-06 | 0.031 | 0.049 | 0.520 |
| Matrix metalloproteinase-1 levels | rs2926741 | T | C | 31.22 | -0.070 | 0.013 | 2.31E-08 | -0.013 | 0.011 | 0.260 |
| Matrix metalloproteinase-1 levels | rs4734879 | A | G | 68.76 | 0.114 | 0.014 | 1.11E-16 | -0.003 | 0.012 | 0.800 |
| Matrix metalloproteinase-1 levels | rs6717478 | A | T | 20.98 | 0.155 | 0.034 | 4.65E-06 | 0.037 | 0.031 | 0.230 |
| Matrix metalloproteinase-1 levels | rs7219205 | A | G | 22.11 | 0.057 | 0.012 | 2.57E-06 | 0.000 | 0.011 | 0.990 |
| Matrix metalloproteinase-1 levels | rs77095316 | T | G | 35.40 | -0.142 | 0.024 | 2.69E-09 | -0.028 | 0.021 | 0.190 |
| Matrix metalloproteinase-1 levels | rs873675 | T | C | 27.81 | 0.123 | 0.023 | 1.34E-07 | -0.007 | 0.022 | 0.760 |
| Matrix metalloproteinase-10 levels | rs112062276 | T | G | 23.34 | 0.120 | 0.025 | 1.36E-06 | -0.007 | 0.024 | 0.770 |
| Matrix metalloproteinase-10 levels | rs11225354 | T | C | 266.90 | 0.296 | 0.018 | 5.38E-60 | -0.021 | 0.017 | 0.210 |
| Matrix metalloproteinase-10 levels | rs113958571 | A | G | 21.18 | -0.232 | 0.050 | 4.18E-06 | 0.028 | 0.039 | 0.470 |
| Matrix metalloproteinase-10 levels | rs12567824 | A | C | 20.93 | 0.070 | 0.015 | 4.76E-06 | 0.016 | 0.014 | 0.270 |
| Matrix metalloproteinase-10 levels | rs1356799 | T | G | 21.16 | -0.069 | 0.015 | 4.22E-06 | -0.007 | 0.014 | 0.620 |
| Matrix metalloproteinase-10 levels | rs142915220 | A | G | 43.44 | -0.326 | 0.049 | 4.37E-11 | -0.046 | 0.043 | 0.280 |
| Matrix metalloproteinase-10 levels | rs17099622 | A | G | 78.47 | -0.206 | 0.023 | 8.12E-19 | 0.021 | 0.021 | 0.330 |
| Matrix metalloproteinase-10 levels | rs17860955 | T | C | 585.33 | 1.137 | 0.047 | 2.60E-129 | -0.023 | 0.038 | 0.540 |
| Matrix metalloproteinase-10 levels | rs181816009 | A | G | 24.42 | -0.177 | 0.036 | 7.76E-07 | 0.034 | 0.035 | 0.330 |
| Matrix metalloproteinase-10 levels | rs2584662 | A | C | 23.95 | -0.060 | 0.012 | 9.91E-07 | -0.004 | 0.011 | 0.710 |
| Matrix metalloproteinase-10 levels | rs3742926 | T | C | 21.65 | -0.091 | 0.020 | 3.27E-06 | -0.019 | 0.019 | 0.320 |
| Matrix metalloproteinase-10 levels | rs516316 | C | G | 73.49 | 0.100 | 0.012 | 1.01E-17 | -0.028 | 0.011 | 0.009 |
| Matrix metalloproteinase-10 levels | rs55804377 | A | G | 21.70 | -0.219 | 0.047 | 3.18E-06 | -0.011 | 0.046 | 0.810 |
| Matrix metalloproteinase-10 levels | rs72699188 | C | G | 31.45 | -0.093 | 0.017 | 2.04E-08 | 0.024 | 0.015 | 0.100 |
| Matrix metalloproteinase-10 levels | rs7966257 | C | G | 21.17 | -0.082 | 0.018 | 4.20E-06 | 0.032 | 0.016 | 0.042 |
| Monocyte chemoattractant protein 2 levels | rs112168535 | T | C | 24.15 | -0.155 | 0.032 | 8.90E-07 | 0.048 | 0.031 | 0.130 |
| Monocyte chemoattractant protein 2 levels | rs11652256 | A | G | 653.71 | -0.905 | 0.035 | 3.48E-144 | -0.003 | 0.031 | 0.930 |
| Monocyte chemoattractant protein 2 levels | rs12075 | A | G | 70.36 | -0.097 | 0.012 | 4.95E-17 | -0.007 | 0.011 | 0.520 |
| Monocyte chemoattractant protein 2 levels | rs12523126 | A | T | 23.35 | 0.112 | 0.023 | 1.35E-06 | 0.019 | 0.021 | 0.360 |
| Monocyte chemoattractant protein 2 levels | rs138884871 | T | C | 21.59 | 0.220 | 0.047 | 3.37E-06 | 0.077 | 0.042 | 0.068 |
| Monocyte chemoattractant protein 2 levels | rs144101664 | T | C | 45.61 | -0.369 | 0.055 | 1.45E-11 | -0.011 | 0.045 | 0.810 |
| Monocyte chemoattractant protein 2 levels | rs144618566 | T | C | 92.38 | 0.517 | 0.054 | 7.15E-22 | 0.021 | 0.040 | 0.600 |
| Monocyte chemoattractant protein 2 levels | rs145516279 | A | G | 21.49 | 0.223 | 0.048 | 3.56E-06 | 0.033 | 0.046 | 0.470 |
| Monocyte chemoattractant protein 2 levels | rs181726805 | A | G | 21.39 | -0.248 | 0.054 | 3.75E-06 | -0.046 | 0.047 | 0.320 |
| Monocyte chemoattractant protein 2 levels | rs1821142 | T | C | 70.48 | 0.401 | 0.048 | 4.64E-17 | 0.015 | 0.040 | 0.710 |
| Monocyte chemoattractant protein 2 levels | rs34202026 | A | T | 321.48 | 0.665 | 0.037 | 6.89E-72 | 0.028 | 0.038 | 0.460 |
| Monocyte chemoattractant protein 2 levels | rs407595 | A | C | 22.48 | 0.070 | 0.015 | 2.12E-06 | -0.018 | 0.014 | 0.190 |
| Monocyte chemoattractant protein 2 levels | rs4722985 | T | C | 22.15 | -0.063 | 0.013 | 2.52E-06 | -0.002 | 0.012 | 0.880 |
| Monocyte chemoattractant protein 2 levels | rs6685547 | A | G | 25.59 | 0.146 | 0.029 | 4.22E-07 | 0.012 | 0.025 | 0.640 |
| Monocyte chemoattractant protein 2 levels | rs7538845 | C | G | 21.52 | 0.057 | 0.012 | 3.50E-06 | -0.001 | 0.011 | 0.910 |
| Monocyte chemoattractant protein 2 levels | rs75573205 | C | G | 21.82 | 0.191 | 0.041 | 2.99E-06 | -0.031 | 0.036 | 0.390 |
| Monocyte chemoattractant protein 2 levels | rs75580960 | T | C | 23.12 | -0.090 | 0.019 | 1.52E-06 | -0.008 | 0.016 | 0.610 |
| Monocyte chemoattractant protein 2 levels | rs76263310 | A | G | 42.32 | 0.296 | 0.046 | 7.74E-11 | -0.023 | 0.045 | 0.620 |
| Monocyte chemoattractant protein 2 levels | rs78743764 | A | C | 21.51 | -0.223 | 0.048 | 3.53E-06 | 0.050 | 0.037 | 0.170 |
| Monocyte chemoattractant protein 2 levels | rs79965992 | A | G | 21.97 | 0.109 | 0.023 | 2.78E-06 | -0.019 | 0.021 | 0.360 |
| Monocyte chemoattractant protein 2 levels | rs80131163 | A | G | 24.18 | 0.196 | 0.040 | 8.77E-07 | -0.049 | 0.039 | 0.220 |
| Monocyte chemoattractant protein 2 levels | rs80219280 | T | G | 788.18 | -0.904 | 0.032 | 2.00E-173 | -0.016 | 0.028 | 0.560 |
| Monocyte chemoattractant protein 2 levels | rs8081047 | T | C | 942.28 | 0.820 | 0.027 | 1.00E-200 | 0.012 | 0.027 | 0.650 |
| Monocyte chemoattractant protein 2 levels | rs948962 | A | C | 20.90 | 0.054 | 0.012 | 4.84E-06 | 0.012 | 0.011 | 0.290 |
| Monocyte chemoattractant protein 2 levels | rs9889517 | A | G | 25.33 | 0.061 | 0.012 | 4.83E-07 | -0.010 | 0.011 | 0.370 |
| Monocyte chemoattractant protein-1 levels | rs117265389 | C | G | 21.16 | 0.173 | 0.038 | 4.24E-06 | -0.041 | 0.036 | 0.250 |
| Monocyte chemoattractant protein-1 levels | rs117317477 | T | G | 21.01 | -0.323 | 0.070 | 4.57E-06 | -0.059 | 0.052 | 0.260 |
| Monocyte chemoattractant protein-1 levels | rs11870164 | T | C | 33.37 | 0.075 | 0.013 | 7.61E-09 | 0.004 | 0.012 | 0.760 |
| Monocyte chemoattractant protein-1 levels | rs12075 | A | G | 224.73 | 0.169 | 0.011 | 8.39E-51 | -0.007 | 0.011 | 0.520 |
| Monocyte chemoattractant protein-1 levels | rs12133241 | T | G | 21.50 | 0.073 | 0.016 | 3.54E-06 | -0.006 | 0.015 | 0.700 |
| Monocyte chemoattractant protein-1 levels | rs12367122 | A | G | 21.60 | 0.074 | 0.016 | 3.35E-06 | 0.021 | 0.014 | 0.150 |
| Monocyte chemoattractant protein-1 levels | rs146186562 | T | G | 21.29 | -0.229 | 0.050 | 3.96E-06 | -0.042 | 0.047 | 0.380 |
| Monocyte chemoattractant protein-1 levels | rs148307902 | A | G | 22.52 | 0.255 | 0.054 | 2.08E-06 | 0.036 | 0.054 | 0.500 |
| Monocyte chemoattractant protein-1 levels | rs149604038 | C | G | 25.60 | -0.281 | 0.056 | 4.21E-07 | -0.036 | 0.051 | 0.470 |
| Monocyte chemoattractant protein-1 levels | rs1846616 | A | T | 51.74 | 0.086 | 0.012 | 6.33E-13 | 0.033 | 0.011 | 0.003 |
| Monocyte chemoattractant protein-1 levels | rs207311 | T | C | 21.12 | 0.058 | 0.013 | 4.32E-06 | -0.006 | 0.012 | 0.630 |
| Monocyte chemoattractant protein-1 levels | rs34292320 | T | C | 26.06 | -0.068 | 0.013 | 3.32E-07 | 0.014 | 0.012 | 0.260 |
| Monocyte chemoattractant protein-1 levels | rs35728689 | A | G | 230.18 | 0.300 | 0.020 | 5.44E-52 | -0.044 | 0.021 | 0.037 |
| Monocyte chemoattractant protein-1 levels | rs4682862 | A | G | 22.29 | 0.058 | 0.012 | 2.34E-06 | 0.000 | 0.011 | 0.980 |
| Monocyte chemoattractant protein-1 levels | rs7619350 | A | G | 24.06 | 0.099 | 0.020 | 9.32E-07 | 0.027 | 0.018 | 0.130 |
| Monocyte chemoattractant protein-1 levels | rs77128226 | T | C | 23.78 | -0.106 | 0.022 | 1.08E-06 | -0.007 | 0.020 | 0.740 |
| Monocyte chemoattractant protein-1 levels | rs77344300 | T | C | 22.22 | -0.138 | 0.029 | 2.44E-06 | -0.012 | 0.027 | 0.650 |
| Monocyte chemoattractant protein-1 levels | rs9942602 | T | C | 27.90 | 0.062 | 0.012 | 1.28E-07 | 0.006 | 0.011 | 0.560 |
| Monocyte chemoattractant protein-3 levels | rs11276535 | T | C | 25.85 | -0.085 | 0.017 | 3.70E-07 | 0.013 | 0.011 | 0.240 |
| Monocyte chemoattractant protein-3 levels | rs12075 | A | G | 47.82 | -0.090 | 0.013 | 4.67E-12 | -0.007 | 0.011 | 0.520 |
| Monocyte chemoattractant protein-3 levels | rs12142504 | T | C | 21.97 | 0.078 | 0.017 | 2.78E-06 | 0.008 | 0.012 | 0.500 |
| Monocyte chemoattractant protein-3 levels | rs139796674 | A | G | 22.50 | 0.233 | 0.049 | 2.10E-06 | -0.035 | 0.047 | 0.450 |
| Monocyte chemoattractant protein-3 levels | rs146174820 | A | G | 23.70 | 0.266 | 0.055 | 1.13E-06 | 0.045 | 0.043 | 0.290 |
| Monocyte chemoattractant protein-3 levels | rs147793446 | A | G | 22.09 | 0.194 | 0.041 | 2.60E-06 | -0.022 | 0.044 | 0.620 |
| Monocyte chemoattractant protein-3 levels | rs148859911 | A | G | 21.11 | 0.151 | 0.033 | 4.34E-06 | -0.037 | 0.026 | 0.160 |
| Monocyte chemoattractant protein-3 levels | rs153473 | C | G | 22.67 | -0.064 | 0.013 | 1.92E-06 | 0.004 | 0.011 | 0.740 |
| Monocyte chemoattractant protein-3 levels | rs16947053 | A | G | 21.61 | 0.226 | 0.049 | 3.34E-06 | 0.024 | 0.039 | 0.540 |
| Monocyte chemoattractant protein-3 levels | rs182239847 | T | G | 22.85 | -0.172 | 0.036 | 1.75E-06 | -0.036 | 0.034 | 0.290 |
| Monocyte chemoattractant protein-3 levels | rs2228467 | T | C | 158.14 | -0.317 | 0.025 | 2.88E-36 | 0.028 | 0.023 | 0.220 |
| Monocyte chemoattractant protein-3 levels | rs28667091 | T | G | 21.24 | -0.061 | 0.013 | 4.05E-06 | -0.014 | 0.011 | 0.220 |
| Monocyte chemoattractant protein-3 levels | rs4146770 | T | C | 31.97 | -0.093 | 0.017 | 1.56E-08 | -0.009 | 0.013 | 0.520 |
| Monocyte chemoattractant protein-3 levels | rs644516 | T | G | 25.27 | 0.075 | 0.015 | 4.99E-07 | 0.000 | 0.012 | 0.970 |
| Monocyte chemoattractant protein-3 levels | rs7116054 | T | C | 31.09 | -0.100 | 0.018 | 2.47E-08 | 0.021 | 0.014 | 0.110 |
| Monocyte chemoattractant protein-3 levels | rs7213460 | A | G | 50.93 | 0.094 | 0.013 | 9.58E-13 | 0.016 | 0.011 | 0.140 |
| Monocyte chemoattractant protein-3 levels | rs7327202 | C | G | 24.95 | -0.097 | 0.019 | 5.89E-07 | 0.009 | 0.015 | 0.560 |
| Monocyte chemoattractant protein-3 levels | rs74157668 | T | C | 21.06 | 0.157 | 0.034 | 4.46E-06 | 0.005 | 0.031 | 0.880 |
| Monocyte chemoattractant protein-3 levels | rs78848134 | T | C | 22.55 | 0.244 | 0.051 | 2.04E-06 | 0.102 | 0.042 | 0.014 |
| Monocyte chemoattractant protein-3 levels | rs9968876 | T | G | 22.40 | -0.105 | 0.022 | 2.21E-06 | 0.001 | 0.018 | 0.970 |
| Monocyte chemoattractant protein-4 levels | rs115511138 | A | G | 21.69 | 0.196 | 0.042 | 3.21E-06 | -0.006 | 0.031 | 0.860 |
| Monocyte chemoattractant protein-4 levels | rs12075 | A | G | 274.86 | 0.189 | 0.011 | 9.89E-62 | -0.007 | 0.011 | 0.520 |
| Monocyte chemoattractant protein-4 levels | rs144118870 | A | G | 22.59 | 0.175 | 0.037 | 2.01E-06 | -0.027 | 0.037 | 0.460 |
| Monocyte chemoattractant protein-4 levels | rs181250 | T | C | 24.62 | -0.103 | 0.021 | 6.99E-07 | -0.019 | 0.017 | 0.270 |
| Monocyte chemoattractant protein-4 levels | rs2497351 | T | C | 21.22 | 0.067 | 0.015 | 4.09E-06 | -0.004 | 0.014 | 0.790 |
| Monocyte chemoattractant protein-4 levels | rs2721961 | T | G | 81.54 | -0.120 | 0.013 | 1.72E-19 | 0.008 | 0.012 | 0.520 |
| Monocyte chemoattractant protein-4 levels | rs3136676 | A | G | 241.80 | 0.390 | 0.025 | 1.60E-54 | -0.027 | 0.023 | 0.250 |
| Monocyte chemoattractant protein-4 levels | rs3917900 | A | G | 168.35 | 0.156 | 0.012 | 1.70E-38 | -0.019 | 0.011 | 0.084 |
| Monocyte chemoattractant protein-4 levels | rs62201455 | A | C | 22.43 | -0.214 | 0.045 | 2.18E-06 | -0.083 | 0.048 | 0.081 |
| Monocyte chemoattractant protein-4 levels | rs62336911 | T | C | 22.33 | 0.157 | 0.033 | 2.29E-06 | -0.047 | 0.034 | 0.170 |
| Monocyte chemoattractant protein-4 levels | rs72825017 | T | G | 63.30 | -0.200 | 0.025 | 1.77E-15 | -0.023 | 0.025 | 0.350 |
| Monocyte chemoattractant protein-4 levels | rs7612912 | T | C | 113.96 | 0.128 | 0.012 | 1.33E-26 | 0.003 | 0.011 | 0.770 |
| Monocyte chemoattractant protein-4 levels | rs8112014 | A | G | 21.04 | -0.058 | 0.013 | 4.49E-06 | 0.011 | 0.012 | 0.330 |
| Monocyte chemoattractant protein-4 levels | rs847767 | A | G | 21.01 | 0.077 | 0.017 | 4.58E-06 | -0.001 | 0.016 | 0.930 |
| Natural killer cell receptor 2B4 levels | rs10903115 | A | G | 20.99 | -0.056 | 0.012 | 4.61E-06 | 0.014 | 0.011 | 0.190 |
| Natural killer cell receptor 2B4 levels | rs11020961 | A | G | 22.75 | 0.077 | 0.016 | 1.84E-06 | -0.010 | 0.014 | 0.470 |
| Natural killer cell receptor 2B4 levels | rs11220506 | A | G | 22.81 | -0.070 | 0.015 | 1.79E-06 | -0.005 | 0.014 | 0.700 |
| Natural killer cell receptor 2B4 levels | rs11265488 | A | G | 27.96 | -0.062 | 0.012 | 1.24E-07 | 0.010 | 0.011 | 0.370 |
| Natural killer cell receptor 2B4 levels | rs11265493 | A | G | 317.98 | 0.212 | 0.012 | 3.99E-71 | 0.000 | 0.011 | 0.990 |
| Natural killer cell receptor 2B4 levels | rs114758826 | A | G | 28.66 | -0.180 | 0.034 | 8.65E-08 | 0.036 | 0.032 | 0.260 |
| Natural killer cell receptor 2B4 levels | rs139924614 | A | G | 21.62 | 0.162 | 0.035 | 3.33E-06 | -0.038 | 0.027 | 0.170 |
| Natural killer cell receptor 2B4 levels | rs147033439 | A | G | 24.95 | 0.205 | 0.041 | 5.88E-07 | -0.026 | 0.035 | 0.460 |
| Natural killer cell receptor 2B4 levels | rs149458216 | A | C | 20.85 | -0.215 | 0.047 | 4.97E-06 | 0.037 | 0.042 | 0.380 |
| Natural killer cell receptor 2B4 levels | rs1574847 | C | G | 21.00 | -0.064 | 0.014 | 4.59E-06 | 0.015 | 0.013 | 0.230 |
| Natural killer cell receptor 2B4 levels | rs2554697 | A | G | 21.89 | 0.063 | 0.013 | 2.88E-06 | 0.001 | 0.011 | 0.900 |
| Natural killer cell receptor 2B4 levels | rs34826779 | T | G | 20.84 | 0.063 | 0.014 | 4.99E-06 | -0.003 | 0.012 | 0.800 |
| Natural killer cell receptor 2B4 levels | rs3828139 | T | C | 39.09 | 0.074 | 0.012 | 4.05E-10 | 0.006 | 0.011 | 0.570 |
| Natural killer cell receptor 2B4 levels | rs4672486 | A | G | 31.92 | 0.066 | 0.012 | 1.61E-08 | -0.008 | 0.011 | 0.450 |
| Natural killer cell receptor 2B4 levels | rs56272634 | T | C | 31.22 | 0.070 | 0.013 | 2.31E-08 | -0.010 | 0.012 | 0.400 |
| Natural killer cell receptor 2B4 levels | rs6928352 | A | G | 24.95 | -0.107 | 0.022 | 5.87E-07 | -0.006 | 0.020 | 0.750 |
| Natural killer cell receptor 2B4 levels | rs72837690 | T | C | 38.54 | -0.078 | 0.013 | 5.37E-10 | 0.004 | 0.011 | 0.750 |
| Neurotrophin-3 levels | rs10780690 | T | G | 21.55 | 0.056 | 0.012 | 3.46E-06 | 0.007 | 0.011 | 0.510 |
| Neurotrophin-3 levels | rs112418830 | T | C | 26.98 | 0.137 | 0.026 | 2.06E-07 | 0.019 | 0.024 | 0.420 |
| Neurotrophin-3 levels | rs12517801 | A | G | 21.04 | -0.056 | 0.012 | 4.50E-06 | -0.003 | 0.011 | 0.810 |
| Neurotrophin-3 levels | rs146532158 | T | C | 23.19 | -0.186 | 0.039 | 1.46E-06 | -0.013 | 0.037 | 0.720 |
| Neurotrophin-3 levels | rs17537796 | A | C | 21.61 | -0.257 | 0.055 | 3.33E-06 | -0.007 | 0.048 | 0.890 |
| Neurotrophin-3 levels | rs2034246 | A | C | 23.52 | 0.058 | 0.012 | 1.23E-06 | 0.015 | 0.011 | 0.170 |
| Neurotrophin-3 levels | rs2107473 | A | G | 22.28 | -0.239 | 0.051 | 2.36E-06 | 0.013 | 0.040 | 0.740 |
| Neurotrophin-3 levels | rs2846299 | A | G | 21.68 | 0.058 | 0.013 | 3.22E-06 | -0.015 | 0.012 | 0.210 |
| Neurotrophin-3 levels | rs28735437 | C | G | 50.72 | -0.117 | 0.016 | 1.06E-12 | -0.020 | 0.016 | 0.210 |
| Neurotrophin-3 levels | rs3218587 | A | G | 21.52 | 0.136 | 0.029 | 3.49E-06 | 0.018 | 0.028 | 0.530 |
| Neurotrophin-3 levels | rs5751454 | T | C | 20.98 | 0.182 | 0.040 | 4.64E-06 | 0.038 | 0.037 | 0.310 |
| Neurotrophin-3 levels | rs58399805 | A | T | 25.27 | 0.111 | 0.022 | 4.98E-07 | -0.052 | 0.024 | 0.030 |
| Neurotrophin-3 levels | rs73166403 | T | C | 21.16 | -0.092 | 0.020 | 4.22E-06 | -0.006 | 0.017 | 0.710 |
| Neurotrophin-3 levels | rs79759094 | A | G | 21.47 | -0.116 | 0.025 | 3.60E-06 | -0.029 | 0.023 | 0.220 |
| Neurturin levels | rs10412462 | A | C | 22.37 | -0.173 | 0.037 | 2.25E-06 | -0.013 | 0.031 | 0.690 |
| Neurturin levels | rs113580784 | A | G | 21.36 | -0.229 | 0.050 | 3.80E-06 | 0.029 | 0.043 | 0.510 |
| Neurturin levels | rs143131035 | T | C | 25.30 | -0.436 | 0.087 | 4.91E-07 | 0.023 | 0.054 | 0.680 |
| Neurturin levels | rs182274799 | A | G | 25.49 | 0.157 | 0.031 | 4.46E-07 | 0.068 | 0.022 | 0.002 |
| Neurturin levels | rs29630 | T | C | 21.66 | -0.074 | 0.016 | 3.25E-06 | 0.000 | 0.012 | 0.970 |
| Neurturin levels | rs4360502 | A | G | 21.38 | -0.065 | 0.014 | 3.76E-06 | -0.003 | 0.012 | 0.810 |
| Neurturin levels | rs62120726 | A | G | 20.88 | 0.079 | 0.017 | 4.88E-06 | 0.002 | 0.013 | 0.900 |
| Neurturin levels | rs7202385 | A | T | 22.58 | 0.075 | 0.016 | 2.02E-06 | -0.006 | 0.012 | 0.590 |
| Neurturin levels | rs76777800 | T | C | 21.06 | 0.339 | 0.074 | 4.44E-06 | -0.017 | 0.054 | 0.750 |
| Neurturin levels | rs77216559 | T | C | 24.04 | 0.167 | 0.034 | 9.44E-07 | -0.043 | 0.028 | 0.120 |
| Neurturin levels | rs908372 | C | G | 20.92 | -0.062 | 0.014 | 4.80E-06 | -0.009 | 0.012 | 0.430 |
| Oncostatin-M levels | rs116928468 | A | G | 22.92 | -0.257 | 0.054 | 1.69E-06 | -0.008 | 0.052 | 0.870 |
| Oncostatin-M levels | rs117867445 | C | G | 22.20 | 0.293 | 0.062 | 2.46E-06 | 0.010 | 0.052 | 0.850 |
| Oncostatin-M levels | rs2285179 | A | G | 29.53 | -0.066 | 0.012 | 5.50E-08 | -0.003 | 0.011 | 0.750 |
| Oncostatin-M levels | rs2511241 | T | C | 56.25 | 0.177 | 0.024 | 6.38E-14 | 0.066 | 0.022 | 0.002 |
| Oncostatin-M levels | rs28444486 | A | G | 21.87 | 0.064 | 0.014 | 2.92E-06 | -0.012 | 0.012 | 0.310 |
| Oncostatin-M levels | rs3859189 | A | G | 88.55 | 0.110 | 0.012 | 4.95E-21 | 0.022 | 0.011 | 0.046 |
| Oncostatin-M levels | rs4823082 | C | G | 21.12 | -0.159 | 0.035 | 4.32E-06 | 0.029 | 0.036 | 0.410 |
| Oncostatin-M levels | rs559651 | T | C | 22.58 | -0.059 | 0.013 | 2.01E-06 | -0.003 | 0.011 | 0.820 |
| Oncostatin-M levels | rs61897429 | A | G | 24.82 | -0.085 | 0.017 | 6.28E-07 | -0.034 | 0.016 | 0.029 |
| Oncostatin-M levels | rs653178 | T | C | 30.42 | -0.073 | 0.013 | 3.48E-08 | 0.038 | 0.011 | 0.001 |
| Oncostatin-M levels | rs7007281 | A | T | 22.59 | 0.116 | 0.024 | 2.00E-06 | 0.000 | 0.021 | 0.980 |
| Oncostatin-M levels | rs7102957 | T | C | 21.54 | -0.080 | 0.017 | 3.46E-06 | 0.021 | 0.016 | 0.180 |
| Oncostatin-M levels | rs80303768 | A | G | 21.61 | -0.152 | 0.033 | 3.35E-06 | 0.033 | 0.028 | 0.250 |
| Oncostatin-M levels | rs9264931 | T | C | 30.11 | -0.105 | 0.019 | 4.09E-08 | -0.034 | 0.015 | 0.026 |
| Osteoprotegerin levels | rs10142466 | A | G | 27.35 | 0.057 | 0.011 | 1.70E-07 | -0.017 | 0.011 | 0.120 |
| Osteoprotegerin levels | rs112635299 | T | G | 36.56 | 0.262 | 0.043 | 1.48E-09 | 0.057 | 0.037 | 0.130 |
| Osteoprotegerin levels | rs114165349 | C | G | 32.83 | -0.195 | 0.034 | 1.01E-08 | 0.003 | 0.036 | 0.940 |
| Osteoprotegerin levels | rs1230164 | C | G | 27.06 | -0.067 | 0.013 | 1.98E-07 | 0.000 | 0.012 | 0.970 |
| Osteoprotegerin levels | rs138408096 | A | G | 22.51 | -0.201 | 0.042 | 2.09E-06 | -0.003 | 0.046 | 0.940 |
| Osteoprotegerin levels | rs138557324 | T | C | 22.69 | -0.225 | 0.047 | 1.91E-06 | 0.001 | 0.044 | 0.980 |
| Osteoprotegerin levels | rs1437633 | A | C | 28.88 | -0.079 | 0.015 | 7.69E-08 | 0.007 | 0.013 | 0.580 |
| Osteoprotegerin levels | rs17600346 | T | C | 27.54 | -0.157 | 0.030 | 1.54E-07 | -0.004 | 0.027 | 0.880 |
| Osteoprotegerin levels | rs192337992 | A | G | 21.68 | -0.156 | 0.033 | 3.23E-06 | -0.018 | 0.029 | 0.520 |
| Osteoprotegerin levels | rs2247769 | T | C | 223.69 | -0.171 | 0.011 | 1.42E-50 | -0.016 | 0.011 | 0.140 |
| Osteoprotegerin levels | rs271665 | T | C | 27.14 | -0.067 | 0.013 | 1.90E-07 | -0.021 | 0.013 | 0.100 |
| Osteoprotegerin levels | rs56009454 | T | G | 21.00 | -0.064 | 0.014 | 4.59E-06 | 0.008 | 0.011 | 0.460 |
| Osteoprotegerin levels | rs6985207 | A | C | 20.97 | 0.052 | 0.011 | 4.67E-06 | 0.024 | 0.011 | 0.027 |
| Osteoprotegerin levels | rs74111611 | T | C | 24.37 | -0.147 | 0.030 | 7.96E-07 | -0.003 | 0.027 | 0.910 |
| Osteoprotegerin levels | rs77507094 | A | G | 20.98 | 0.197 | 0.043 | 4.64E-06 | 0.048 | 0.043 | 0.260 |
| Osteoprotegerin levels | rs9946923 | T | C | 20.93 | 0.172 | 0.038 | 4.77E-06 | -0.013 | 0.031 | 0.680 |
| Programmed cell death 1 ligand 1 levels | rs10043030 | T | C | 22.60 | -0.118 | 0.025 | 1.99E-06 | -0.011 | 0.024 | 0.630 |
| Programmed cell death 1 ligand 1 levels | rs113674769 | T | G | 20.87 | -0.114 | 0.025 | 4.92E-06 | 0.002 | 0.021 | 0.930 |
| Programmed cell death 1 ligand 1 levels | rs12539643 | C | G | 22.09 | 0.191 | 0.041 | 2.60E-06 | -0.019 | 0.032 | 0.560 |
| Programmed cell death 1 ligand 1 levels | rs2283438 | T | C | 23.12 | -0.058 | 0.012 | 1.52E-06 | 0.011 | 0.011 | 0.310 |
| Programmed cell death 1 ligand 1 levels | rs35024691 | C | G | 21.19 | -0.101 | 0.022 | 4.17E-06 | 0.011 | 0.018 | 0.530 |
| Programmed cell death 1 ligand 1 levels | rs4974444 | A | G | 21.50 | -0.082 | 0.018 | 3.55E-06 | 0.015 | 0.017 | 0.370 |
| Programmed cell death 1 ligand 1 levels | rs60830384 | A | T | 28.54 | 0.114 | 0.021 | 9.16E-08 | -0.010 | 0.021 | 0.640 |
| Programmed cell death 1 ligand 1 levels | rs62373966 | T | G | 26.56 | 0.141 | 0.027 | 2.55E-07 | 0.027 | 0.026 | 0.310 |
| Programmed cell death 1 ligand 1 levels | rs7026097 | A | T | 27.04 | 0.083 | 0.016 | 1.99E-07 | -0.008 | 0.015 | 0.590 |
| Programmed cell death 1 ligand 1 levels | rs7125631 | T | C | 22.64 | -0.061 | 0.013 | 1.96E-06 | 0.011 | 0.011 | 0.320 |
| Programmed cell death 1 ligand 1 levels | rs7304709 | T | C | 21.07 | 0.054 | 0.012 | 4.44E-06 | -0.019 | 0.011 | 0.075 |
| Programmed cell death 1 ligand 1 levels | rs75510105 | A | G | 25.21 | 0.193 | 0.039 | 5.15E-07 | -0.053 | 0.037 | 0.160 |
| Programmed cell death 1 ligand 1 levels | rs79045618 | A | G | 24.97 | 0.162 | 0.032 | 5.83E-07 | 0.005 | 0.030 | 0.870 |
| Programmed cell death 1 ligand 1 levels | rs7945680 | T | G | 28.63 | 0.061 | 0.011 | 8.75E-08 | 0.001 | 0.011 | 0.930 |
| Programmed cell death 1 ligand 1 levels | rs822335 | T | C | 116.46 | -0.130 | 0.012 | 3.77E-27 | -0.019 | 0.012 | 0.100 |
| Protein S100-A12 levels | rs112956934 | T | C | 21.43 | 0.188 | 0.041 | 3.67E-06 | 0.070 | 0.041 | 0.083 |
| Protein S100-A12 levels | rs112988802 | T | C | 22.70 | -0.140 | 0.029 | 1.89E-06 | -0.034 | 0.024 | 0.150 |
| Protein S100-A12 levels | rs13384799 | T | C | 21.87 | -0.062 | 0.013 | 2.92E-06 | -0.008 | 0.012 | 0.520 |
| Protein S100-A12 levels | rs147302029 | A | G | 27.40 | 0.181 | 0.035 | 1.65E-07 | -0.030 | 0.032 | 0.360 |
| Protein S100-A12 levels | rs150015576 | A | C | 21.03 | 0.194 | 0.042 | 4.51E-06 | -0.002 | 0.046 | 0.970 |
| Protein S100-A12 levels | rs191808657 | A | C | 21.16 | 0.306 | 0.067 | 4.22E-06 | 0.012 | 0.052 | 0.810 |
| Protein S100-A12 levels | rs2056031 | T | C | 25.76 | -0.060 | 0.012 | 3.86E-07 | -0.014 | 0.011 | 0.220 |
| Protein S100-A12 levels | rs2425640 | A | G | 22.47 | -0.058 | 0.012 | 2.14E-06 | 0.014 | 0.011 | 0.210 |
| Protein S100-A12 levels | rs3014874 | A | G | 158.72 | -0.173 | 0.014 | 2.15E-36 | 0.013 | 0.012 | 0.310 |
| Protein S100-A12 levels | rs3802266 | A | G | 22.12 | 0.056 | 0.012 | 2.56E-06 | -0.003 | 0.011 | 0.790 |
| Protein S100-A12 levels | rs55783131 | T | C | 23.59 | 0.206 | 0.043 | 1.19E-06 | -0.014 | 0.035 | 0.680 |
| Protein S100-A12 levels | rs56268787 | T | C | 21.26 | -0.094 | 0.020 | 4.01E-06 | -0.027 | 0.018 | 0.150 |
| Protein S100-A12 levels | rs59538998 | C | G | 21.20 | -0.119 | 0.026 | 4.13E-06 | 0.014 | 0.024 | 0.570 |
| Protein S100-A12 levels | rs61803119 | T | G | 59.86 | 0.150 | 0.019 | 1.02E-14 | -0.027 | 0.018 | 0.140 |
| Protein S100-A12 levels | rs78800546 | A | G | 22.43 | -0.253 | 0.053 | 2.18E-06 | -0.107 | 0.052 | 0.039 |
| Signaling lymphocytic activation molecule levels | rs10212190 | A | T | 36.10 | 0.073 | 0.012 | 1.88E-09 | -0.013 | 0.011 | 0.260 |
| Signaling lymphocytic activation molecule levels | rs10499604 | T | C | 21.53 | 0.058 | 0.013 | 3.48E-06 | 0.012 | 0.011 | 0.310 |
| Signaling lymphocytic activation molecule levels | rs11065264 | T | G | 21.40 | 0.057 | 0.012 | 3.73E-06 | -0.007 | 0.011 | 0.530 |
| Signaling lymphocytic activation molecule levels | rs111865527 | T | C | 22.72 | 0.271 | 0.057 | 1.88E-06 | 0.004 | 0.047 | 0.930 |
| Signaling lymphocytic activation molecule levels | rs112742549 | T | C | 22.89 | 0.242 | 0.051 | 1.71E-06 | 0.059 | 0.051 | 0.250 |
| Signaling lymphocytic activation molecule levels | rs12058421 | A | C | 62.40 | -0.126 | 0.016 | 2.80E-15 | 0.004 | 0.015 | 0.800 |
| Signaling lymphocytic activation molecule levels | rs13014154 | A | G | 24.76 | -0.061 | 0.012 | 6.50E-07 | -0.006 | 0.011 | 0.620 |
| Signaling lymphocytic activation molecule levels | rs13147502 | A | G | 22.99 | -0.061 | 0.013 | 1.62E-06 | -0.030 | 0.011 | 0.008 |
| Signaling lymphocytic activation molecule levels | rs138657007 | A | G | 24.62 | -0.286 | 0.058 | 6.98E-07 | 0.045 | 0.044 | 0.310 |
| Signaling lymphocytic activation molecule levels | rs147616029 | T | C | 25.31 | -0.064 | 0.013 | 4.87E-07 | -0.004 | 0.011 | 0.710 |
| Signaling lymphocytic activation molecule levels | rs1609310 | T | G | 21.55 | -0.056 | 0.012 | 3.46E-06 | 0.001 | 0.011 | 0.890 |
| Signaling lymphocytic activation molecule levels | rs17720330 | C | G | 21.25 | -0.198 | 0.043 | 4.04E-06 | 0.036 | 0.042 | 0.390 |
| Signaling lymphocytic activation molecule levels | rs1972433 | A | C | 25.00 | 0.066 | 0.013 | 5.73E-07 | -0.021 | 0.011 | 0.052 |
| Signaling lymphocytic activation molecule levels | rs2623960 | T | C | 23.15 | 0.069 | 0.014 | 1.50E-06 | -0.006 | 0.013 | 0.670 |
| Signaling lymphocytic activation molecule levels | rs2725405 | C | G | 40.20 | 0.089 | 0.014 | 2.29E-10 | 0.006 | 0.011 | 0.560 |
| Signaling lymphocytic activation molecule levels | rs2790462 | T | C | 35.15 | -0.075 | 0.013 | 3.06E-09 | 0.002 | 0.012 | 0.840 |
| Signaling lymphocytic activation molecule levels | rs35271532 | A | G | 21.04 | -0.149 | 0.032 | 4.51E-06 | -0.015 | 0.031 | 0.630 |
| Signaling lymphocytic activation molecule levels | rs3745163 | A | C | 21.61 | 0.067 | 0.015 | 3.35E-06 | 0.030 | 0.013 | 0.020 |
| Signaling lymphocytic activation molecule levels | rs3806818 | A | G | 21.35 | 0.071 | 0.015 | 3.82E-06 | 0.010 | 0.014 | 0.490 |
| Signaling lymphocytic activation molecule levels | rs56244095 | A | C | 42.17 | 0.101 | 0.016 | 8.38E-11 | -0.007 | 0.014 | 0.610 |
| Signaling lymphocytic activation molecule levels | rs570025519 | A | G | 64.88 | 0.132 | 0.016 | 7.96E-16 | -0.019 | 0.012 | 0.120 |
| Signaling lymphocytic activation molecule levels | rs60094514 | T | C | 185.94 | 0.221 | 0.016 | 2.45E-42 | -0.003 | 0.016 | 0.850 |
| Signaling lymphocytic activation molecule levels | rs73151926 | T | C | 21.55 | 0.106 | 0.023 | 3.45E-06 | -0.004 | 0.019 | 0.860 |
| Signaling lymphocytic activation molecule levels | rs73231041 | C | G | 21.78 | -0.279 | 0.060 | 3.05E-06 | -0.050 | 0.040 | 0.220 |
| Signaling lymphocytic activation molecule levels | rs7745783 | T | C | 24.50 | -0.059 | 0.012 | 7.44E-07 | -0.017 | 0.011 | 0.120 |
| Signaling lymphocytic activation molecule levels | rs79348253 | A | G | 28.87 | -0.159 | 0.030 | 7.75E-08 | -0.018 | 0.025 | 0.470 |
| SIR2-like protein 2 levels | rs11115639 | A | C | 20.89 | -0.084 | 0.018 | 4.86E-06 | -0.007 | 0.018 | 0.700 |
| SIR2-like protein 2 levels | rs115455827 | A | G | 21.25 | 0.128 | 0.028 | 4.02E-06 | -0.034 | 0.027 | 0.210 |
| SIR2-like protein 2 levels | rs116198125 | T | C | 21.37 | -0.152 | 0.033 | 3.78E-06 | 0.006 | 0.033 | 0.850 |
| SIR2-like protein 2 levels | rs12152184 | A | G | 21.52 | 0.097 | 0.021 | 3.49E-06 | 0.005 | 0.018 | 0.800 |
| SIR2-like protein 2 levels | rs138897138 | A | G | 22.76 | 0.104 | 0.022 | 1.84E-06 | -0.005 | 0.019 | 0.790 |
| SIR2-like protein 2 levels | rs147383134 | T | C | 21.81 | 0.257 | 0.055 | 3.02E-06 | 0.010 | 0.050 | 0.850 |
| SIR2-like protein 2 levels | rs60459634 | A | G | 21.55 | -0.106 | 0.023 | 3.45E-06 | -0.006 | 0.020 | 0.760 |
| SIR2-like protein 2 levels | rs7718478 | A | T | 21.44 | 0.064 | 0.014 | 3.65E-06 | 0.016 | 0.013 | 0.230 |
| SIR2-like protein 2 levels | rs77381020 | T | C | 21.95 | 0.086 | 0.018 | 2.80E-06 | -0.002 | 0.016 | 0.890 |
| STAM binding protein levels | rs10426867 | A | G | 21.60 | 0.203 | 0.044 | 3.36E-06 | 0.014 | 0.038 | 0.720 |
| STAM binding protein levels | rs111581172 | A | G | 23.93 | -0.172 | 0.035 | 9.98E-07 | -0.036 | 0.035 | 0.310 |
| STAM binding protein levels | rs111872246 | A | G | 26.67 | 0.220 | 0.043 | 2.41E-07 | 0.062 | 0.042 | 0.140 |
| STAM binding protein levels | rs116198125 | T | C | 20.85 | -0.148 | 0.033 | 4.97E-06 | 0.006 | 0.033 | 0.850 |
| STAM binding protein levels | rs12152184 | A | G | 21.35 | 0.096 | 0.021 | 3.83E-06 | 0.005 | 0.018 | 0.800 |
| STAM binding protein levels | rs138897138 | A | G | 24.77 | 0.109 | 0.022 | 6.46E-07 | -0.005 | 0.019 | 0.790 |
| STAM binding protein levels | rs140656901 | A | G | 22.42 | 0.129 | 0.027 | 2.19E-06 | 0.035 | 0.024 | 0.150 |
| STAM binding protein levels | rs2280441 | A | G | 25.85 | -0.157 | 0.031 | 3.69E-07 | 0.051 | 0.033 | 0.130 |
| STAM binding protein levels | rs73327656 | A | G | 21.07 | 0.235 | 0.051 | 4.44E-06 | 0.028 | 0.048 | 0.560 |
| STAM binding protein levels | rs75610895 | T | C | 23.45 | -0.191 | 0.039 | 1.28E-06 | -0.028 | 0.034 | 0.410 |
| Stem cell factor levels | rs10832027 | A | G | 22.40 | -0.057 | 0.012 | 2.21E-06 | 0.017 | 0.012 | 0.160 |
| Stem cell factor levels | rs11126305 | A | G | 23.89 | -0.057 | 0.012 | 1.02E-06 | 0.009 | 0.011 | 0.400 |
| Stem cell factor levels | rs11199541 | T | C | 20.85 | 0.155 | 0.034 | 4.96E-06 | 0.027 | 0.032 | 0.390 |
| Stem cell factor levels | rs11608458 | T | C | 33.58 | -0.071 | 0.012 | 6.83E-09 | -0.010 | 0.011 | 0.360 |
| Stem cell factor levels | rs11877350 | A | G | 21.14 | 0.054 | 0.012 | 4.26E-06 | 0.034 | 0.011 | 0.002 |
| Stem cell factor levels | rs12149545 | A | G | 86.81 | 0.115 | 0.012 | 1.20E-20 | -0.019 | 0.012 | 0.100 |
| Stem cell factor levels | rs12378537 | T | C | 22.99 | 0.105 | 0.022 | 1.63E-06 | -0.001 | 0.020 | 0.950 |
| Stem cell factor levels | rs138854302 | T | C | 46.04 | -0.139 | 0.021 | 1.16E-11 | 0.025 | 0.019 | 0.200 |
| Stem cell factor levels | rs139690 | A | G | 21.16 | 0.110 | 0.024 | 4.22E-06 | 0.012 | 0.022 | 0.570 |
| Stem cell factor levels | rs146276488 | A | G | 22.03 | 0.242 | 0.052 | 2.68E-06 | 0.038 | 0.045 | 0.390 |
| Stem cell factor levels | rs151246947 | A | G | 21.82 | 0.212 | 0.045 | 3.00E-06 | 0.041 | 0.037 | 0.270 |
| Stem cell factor levels | rs16942887 | A | G | 94.01 | 0.166 | 0.017 | 3.14E-22 | -0.024 | 0.017 | 0.170 |
| Stem cell factor levels | rs174535 | T | C | 36.90 | -0.074 | 0.012 | 1.24E-09 | 0.038 | 0.011 | 0.001 |
| Stem cell factor levels | rs2024570 | T | C | 33.89 | -0.199 | 0.034 | 5.85E-09 | -0.007 | 0.032 | 0.840 |
| Stem cell factor levels | rs2161465 | A | T | 22.13 | -0.072 | 0.015 | 2.55E-06 | -0.014 | 0.013 | 0.300 |
| Stem cell factor levels | rs2740488 | A | C | 75.55 | 0.116 | 0.013 | 3.57E-18 | 0.020 | 0.012 | 0.110 |
| Stem cell factor levels | rs2980888 | T | C | 29.38 | -0.068 | 0.013 | 5.94E-08 | -0.006 | 0.012 | 0.640 |
| Stem cell factor levels | rs34813411 | T | C | 22.81 | -0.162 | 0.034 | 1.79E-06 | -0.023 | 0.030 | 0.450 |
| Stem cell factor levels | rs45617141 | T | G | 29.97 | 0.280 | 0.051 | 4.38E-08 | 0.012 | 0.050 | 0.810 |
| Stem cell factor levels | rs557933 | A | C | 21.96 | -0.055 | 0.012 | 2.78E-06 | -0.023 | 0.011 | 0.031 |
| Stem cell factor levels | rs6073958 | T | C | 393.91 | -0.286 | 0.014 | 1.16E-87 | -0.016 | 0.014 | 0.240 |
| Stem cell factor levels | rs705379 | A | G | 43.23 | 0.079 | 0.012 | 4.87E-11 | -0.005 | 0.011 | 0.630 |
| Stem cell factor levels | rs71431776 | A | C | 23.87 | -0.094 | 0.019 | 1.03E-06 | 0.020 | 0.017 | 0.250 |
| Stem cell factor levels | rs71644719 | A | G | 21.08 | -0.158 | 0.035 | 4.40E-06 | 0.023 | 0.029 | 0.440 |
| Stem cell factor levels | rs72847212 | T | C | 23.10 | -0.072 | 0.015 | 1.53E-06 | 0.016 | 0.014 | 0.230 |
| Stem cell factor levels | rs7664024 | T | C | 22.02 | -0.072 | 0.015 | 2.69E-06 | 0.010 | 0.014 | 0.480 |
| Stem cell factor levels | rs78397068 | T | C | 26.61 | 0.120 | 0.023 | 2.49E-07 | -0.010 | 0.021 | 0.630 |
| Stem cell factor levels | rs785900 | T | C | 23.74 | 0.058 | 0.012 | 1.10E-06 | 0.002 | 0.011 | 0.890 |
| Stem cell factor levels | rs798893 | C | G | 45.40 | 0.095 | 0.014 | 1.61E-11 | -0.020 | 0.013 | 0.120 |
| Sulfotransferase 1A1 levels | rs10842189 | T | C | 21.38 | -0.080 | 0.017 | 3.76E-06 | -0.009 | 0.015 | 0.520 |
| Sulfotransferase 1A1 levels | rs11074902 | A | G | 25.00 | 0.070 | 0.014 | 5.73E-07 | 0.013 | 0.011 | 0.230 |
| Sulfotransferase 1A1 levels | rs117222566 | A | G | 21.76 | 0.271 | 0.058 | 3.10E-06 | -0.132 | 0.048 | 0.006 |
| Sulfotransferase 1A1 levels | rs149278 | T | C | 194.34 | -0.188 | 0.014 | 3.58E-44 | -0.010 | 0.011 | 0.350 |
| Sulfotransferase 1A1 levels | rs149869672 | T | C | 21.67 | -0.318 | 0.068 | 3.24E-06 | -0.045 | 0.050 | 0.360 |
| Sulfotransferase 1A1 levels | rs1698742 | T | C | 22.82 | -0.098 | 0.021 | 1.78E-06 | 0.005 | 0.017 | 0.760 |
| Sulfotransferase 1A1 levels | rs2213907 | A | G | 22.37 | -0.150 | 0.032 | 2.25E-06 | -0.004 | 0.027 | 0.870 |
| Sulfotransferase 1A1 levels | rs232928 | T | C | 20.92 | 0.062 | 0.014 | 4.80E-06 | 0.007 | 0.011 | 0.500 |
| Sulfotransferase 1A1 levels | rs2691531 | T | C | 22.83 | -0.065 | 0.014 | 1.77E-06 | 0.012 | 0.011 | 0.290 |
| Sulfotransferase 1A1 levels | rs2712255 | A | G | 22.81 | 0.070 | 0.015 | 1.79E-06 | 0.001 | 0.011 | 0.960 |
| Sulfotransferase 1A1 levels | rs55793562 | A | G | 21.56 | 0.092 | 0.020 | 3.43E-06 | 0.022 | 0.016 | 0.190 |
| Sulfotransferase 1A1 levels | rs66530140 | T | C | 152.23 | -0.168 | 0.014 | 5.64E-35 | 0.000 | 0.011 | 0.970 |
| Sulfotransferase 1A1 levels | rs703595 | T | C | 23.66 | -0.072 | 0.015 | 1.15E-06 | -0.021 | 0.012 | 0.085 |
| Sulfotransferase 1A1 levels | rs710446 | T | C | 27.82 | -0.071 | 0.014 | 1.33E-07 | 0.002 | 0.011 | 0.830 |
| Sulfotransferase 1A1 levels | rs72643498 | A | C | 22.92 | -0.180 | 0.038 | 1.69E-06 | 0.018 | 0.036 | 0.610 |
| Sulfotransferase 1A1 levels | rs72656644 | C | G | 23.12 | 0.108 | 0.022 | 1.52E-06 | -0.001 | 0.019 | 0.960 |
| Sulfotransferase 1A1 levels | rs76833948 | A | T | 22.11 | 0.134 | 0.029 | 2.58E-06 | 0.022 | 0.023 | 0.350 |
| Sulfotransferase 1A1 levels | rs77919742 | T | C | 24.93 | -0.143 | 0.029 | 5.94E-07 | -0.028 | 0.024 | 0.250 |
| Sulfotransferase 1A1 levels | rs9804965 | A | C | 28.49 | -0.193 | 0.036 | 9.40E-08 | -0.024 | 0.031 | 0.440 |
| T-cell surface glycoprotein CD5 levels | rs11622090 | T | C | 21.10 | -0.059 | 0.013 | 4.35E-06 | -0.003 | 0.012 | 0.770 |
| T-cell surface glycoprotein CD5 levels | rs117276991 | A | G | 24.26 | -0.126 | 0.026 | 8.40E-07 | 0.004 | 0.022 | 0.850 |
| T-cell surface glycoprotein CD5 levels | rs117516652 | A | G | 24.87 | 0.237 | 0.048 | 6.12E-07 | 0.024 | 0.042 | 0.570 |
| T-cell surface glycoprotein CD5 levels | rs12416520 | A | G | 22.71 | -0.063 | 0.013 | 1.89E-06 | -0.004 | 0.012 | 0.770 |
| T-cell surface glycoprotein CD5 levels | rs1259355 | A | G | 22.86 | 0.057 | 0.012 | 1.74E-06 | -0.004 | 0.011 | 0.680 |
| T-cell surface glycoprotein CD5 levels | rs13010492 | C | G | 23.31 | -0.059 | 0.012 | 1.38E-06 | 0.087 | 0.011 | 0.000 |
| T-cell surface glycoprotein CD5 levels | rs138861398 | A | C | 28.28 | -0.080 | 0.015 | 1.05E-07 | -0.008 | 0.013 | 0.510 |
| T-cell surface glycoprotein CD5 levels | rs17345759 | A | C | 21.42 | -0.113 | 0.025 | 3.68E-06 | -0.006 | 0.024 | 0.800 |
| T-cell surface glycoprotein CD5 levels | rs17769062 | T | C | 24.05 | 0.164 | 0.033 | 9.38E-07 | 0.006 | 0.027 | 0.830 |
| T-cell surface glycoprotein CD5 levels | rs2237450 | T | C | 25.24 | 0.062 | 0.012 | 5.06E-07 | 0.017 | 0.011 | 0.130 |
| T-cell surface glycoprotein CD5 levels | rs3104373 | T | C | 34.77 | 0.097 | 0.017 | 3.70E-09 | 0.012 | 0.015 | 0.440 |
| T-cell surface glycoprotein CD5 levels | rs4073745 | A | G | 27.18 | -0.068 | 0.013 | 1.85E-07 | -0.004 | 0.012 | 0.730 |
| T-cell surface glycoprotein CD5 levels | rs4893 | A | G | 22.09 | 0.147 | 0.031 | 2.61E-06 | -0.012 | 0.028 | 0.670 |
| T-cell surface glycoprotein CD5 levels | rs4939490 | C | G | 81.45 | 0.108 | 0.012 | 1.80E-19 | -0.037 | 0.011 | 0.001 |
| T-cell surface glycoprotein CD5 levels | rs527506034 | A | G | 27.04 | 0.083 | 0.016 | 1.99E-07 | -0.016 | 0.014 | 0.250 |
| T-cell surface glycoprotein CD5 levels | rs563284470 | A | G | 21.98 | 0.183 | 0.039 | 2.76E-06 | -0.002 | 0.031 | 0.960 |
| T-cell surface glycoprotein CD5 levels | rs60562286 | A | T | 22.81 | -0.168 | 0.035 | 1.79E-06 | 0.040 | 0.033 | 0.230 |
| T-cell surface glycoprotein CD5 levels | rs61747728 | T | C | 34.60 | 0.184 | 0.031 | 4.06E-09 | 0.039 | 0.028 | 0.160 |
| T-cell surface glycoprotein CD5 levels | rs674379 | C | G | 89.65 | 0.119 | 0.013 | 2.85E-21 | 0.009 | 0.011 | 0.440 |
| T-cell surface glycoprotein CD5 levels | rs7242462 | A | G | 41.11 | -0.120 | 0.019 | 1.44E-10 | 0.001 | 0.018 | 0.960 |
| T-cell surface glycoprotein CD5 levels | rs72821405 | T | C | 21.84 | -0.101 | 0.022 | 2.97E-06 | -0.012 | 0.020 | 0.550 |
| T-cell surface glycoprotein CD6 isoform levels | rs11230282 | A | G | 21.57 | 0.061 | 0.013 | 3.42E-06 | -0.009 | 0.013 | 0.460 |
| T-cell surface glycoprotein CD6 isoform levels | rs115830154 | A | G | 24.18 | -0.083 | 0.017 | 8.78E-07 | 0.012 | 0.015 | 0.450 |
| T-cell surface glycoprotein CD6 isoform levels | rs12074680 | A | G | 22.39 | -0.186 | 0.039 | 2.22E-06 | 0.011 | 0.033 | 0.750 |
| T-cell surface glycoprotein CD6 isoform levels | rs143374617 | T | C | 28.81 | 0.177 | 0.033 | 7.97E-08 | -0.026 | 0.032 | 0.420 |
| T-cell surface glycoprotein CD6 isoform levels | rs2241002 | T | C | 29.93 | 0.085 | 0.016 | 4.48E-08 | 0.014 | 0.014 | 0.310 |
| T-cell surface glycoprotein CD6 isoform levels | rs35086654 | T | C | 21.84 | -0.242 | 0.052 | 2.97E-06 | -0.032 | 0.042 | 0.450 |
| T-cell surface glycoprotein CD6 isoform levels | rs35634144 | C | G | 21.71 | 0.175 | 0.038 | 3.17E-06 | 0.018 | 0.032 | 0.570 |
| T-cell surface glycoprotein CD6 isoform levels | rs550421 | A | G | 680.53 | 0.300 | 0.012 | 5.13E-150 | 0.010 | 0.011 | 0.380 |
| T-cell surface glycoprotein CD6 isoform levels | rs60988380 | T | C | 24.48 | 0.096 | 0.019 | 7.49E-07 | 0.023 | 0.018 | 0.190 |
| T-cell surface glycoprotein CD6 isoform levels | rs7119502 | A | G | 67.10 | -0.248 | 0.030 | 2.58E-16 | -0.068 | 0.030 | 0.023 |
| T-cell surface glycoprotein CD6 isoform levels | rs72969761 | A | T | 22.82 | -0.180 | 0.038 | 1.78E-06 | -0.073 | 0.034 | 0.030 |
| T-cell surface glycoprotein CD6 isoform levels | rs7396422 | T | C | 1163.50 | 0.403 | 0.012 | 1.00E-200 | 0.009 | 0.011 | 0.420 |
| T-cell surface glycoprotein CD6 isoform levels | rs74886615 | A | T | 28.44 | 0.069 | 0.013 | 9.64E-08 | 0.000 | 0.011 | 0.970 |
| T-cell surface glycoprotein CD6 isoform levels | rs8051133 | A | G | 20.90 | -0.108 | 0.024 | 4.83E-06 | 0.004 | 0.022 | 0.870 |
| T-cell surface glycoprotein CD6 isoform levels | rs841332 | A | G | 21.92 | -0.072 | 0.015 | 2.84E-06 | -0.012 | 0.014 | 0.410 |
| T-cell surface glycoprotein CD6 isoform levels | rs9691968 | A | C | 23.24 | 0.065 | 0.013 | 1.43E-06 | 0.007 | 0.013 | 0.570 |
| Thymic stromal lymphopoietin levels | rs112206094 | A | T | 21.59 | -0.093 | 0.020 | 3.37E-06 | -0.018 | 0.017 | 0.300 |
| Thymic stromal lymphopoietin levels | rs117095006 | A | G | 21.55 | -0.157 | 0.034 | 3.45E-06 | -0.013 | 0.026 | 0.620 |
| Thymic stromal lymphopoietin levels | rs12448125 | T | G | 23.63 | 0.178 | 0.037 | 1.17E-06 | -0.055 | 0.032 | 0.084 |
| Thymic stromal lymphopoietin levels | rs12472785 | C | G | 23.39 | -0.074 | 0.015 | 1.32E-06 | -0.031 | 0.013 | 0.016 |
| Thymic stromal lymphopoietin levels | rs140886020 | A | G | 21.28 | 0.162 | 0.035 | 3.98E-06 | 0.007 | 0.031 | 0.830 |
| Thymic stromal lymphopoietin levels | rs4724126 | T | G | 30.98 | 0.085 | 0.015 | 2.61E-08 | -0.004 | 0.012 | 0.740 |
| Thymic stromal lymphopoietin levels | rs72652144 | A | G | 22.29 | 0.163 | 0.035 | 2.34E-06 | -0.045 | 0.030 | 0.140 |
| Thymic stromal lymphopoietin levels | rs72811179 | T | C | 22.02 | -0.296 | 0.063 | 2.70E-06 | 0.008 | 0.043 | 0.850 |
| Thymic stromal lymphopoietin levels | rs7406537 | A | G | 21.40 | -0.064 | 0.014 | 3.73E-06 | -0.013 | 0.011 | 0.250 |
| Thymic stromal lymphopoietin levels | rs75129390 | A | T | 22.11 | 0.074 | 0.016 | 2.57E-06 | 0.003 | 0.011 | 0.790 |
| TNF-beta levels | rs112317147 | T | C | 21.75 | -0.144 | 0.031 | 3.11E-06 | -0.007 | 0.024 | 0.770 |
| TNF-beta levels | rs113244922 | T | C | 21.69 | 0.232 | 0.050 | 3.20E-06 | -0.015 | 0.036 | 0.670 |
| TNF-beta levels | rs114250919 | T | C | 25.39 | 0.247 | 0.049 | 4.69E-07 | 0.021 | 0.038 | 0.580 |
| TNF-beta levels | rs12743015 | C | G | 22.65 | -0.192 | 0.040 | 1.94E-06 | 0.016 | 0.035 | 0.650 |
| TNF-beta levels | rs12883833 | A | G | 23.37 | -0.125 | 0.026 | 1.34E-06 | -0.036 | 0.020 | 0.076 |
| TNF-beta levels | rs138471526 | T | C | 21.63 | -0.342 | 0.074 | 3.31E-06 | 0.043 | 0.053 | 0.420 |
| TNF-beta levels | rs139511528 | A | G | 22.75 | -0.249 | 0.052 | 1.85E-06 | -0.014 | 0.040 | 0.720 |
| TNF-beta levels | rs143019966 | T | C | 22.14 | 0.212 | 0.045 | 2.54E-06 | -0.005 | 0.037 | 0.880 |
| TNF-beta levels | rs147423408 | A | G | 24.49 | 0.173 | 0.035 | 7.48E-07 | 0.014 | 0.026 | 0.590 |
| TNF-beta levels | rs16852556 | T | C | 22.81 | 0.151 | 0.032 | 1.79E-06 | 0.016 | 0.025 | 0.520 |
| TNF-beta levels | rs2074475 | T | C | 30.05 | 0.231 | 0.042 | 4.20E-08 | -0.029 | 0.041 | 0.480 |
| TNF-beta levels | rs2523882 | T | C | 191.17 | -0.199 | 0.014 | 1.77E-43 | 0.022 | 0.012 | 0.085 |
| TNF-beta levels | rs2844500 | T | C | 1027.59 | -0.628 | 0.020 | 1.00E-200 | -0.007 | 0.017 | 0.690 |
| TNF-beta levels | rs28700215 | T | C | 21.19 | -0.063 | 0.014 | 4.17E-06 | -0.016 | 0.011 | 0.150 |
| TNF-beta levels | rs542608643 | T | C | 57.92 | -0.355 | 0.047 | 2.74E-14 | -0.017 | 0.034 | 0.630 |
| TNF-beta levels | rs55914821 | A | G | 22.13 | 0.075 | 0.016 | 2.55E-06 | 0.010 | 0.013 | 0.460 |
| TNF-beta levels | rs72841573 | T | C | 25.23 | 0.281 | 0.056 | 5.08E-07 | 0.018 | 0.042 | 0.670 |
| TNF-beta levels | rs7310615 | C | G | 102.40 | 0.136 | 0.013 | 4.53E-24 | -0.037 | 0.011 | 0.001 |
| TNF-beta levels | rs74363807 | T | C | 22.01 | 0.250 | 0.053 | 2.71E-06 | 0.052 | 0.049 | 0.290 |
| TNF-beta levels | rs7583622 | A | G | 21.58 | 0.075 | 0.016 | 3.38E-06 | 0.007 | 0.013 | 0.630 |
| TNF-beta levels | rs76913603 | A | G | 21.10 | -0.174 | 0.038 | 4.36E-06 | -0.027 | 0.031 | 0.380 |
| TNF-beta levels | rs77897196 | T | C | 21.86 | -0.192 | 0.041 | 2.93E-06 | 0.000 | 0.031 | 1.000 |
| TNF-related activation-induced cytokine levels | rs113835939 | A | C | 21.73 | -0.194 | 0.042 | 3.15E-06 | -0.024 | 0.039 | 0.530 |
| TNF-related activation-induced cytokine levels | rs117113213 | A | G | 30.10 | -0.165 | 0.030 | 4.10E-08 | 0.006 | 0.031 | 0.860 |
| TNF-related activation-induced cytokine levels | rs11713634 | A | G | 42.51 | -0.098 | 0.015 | 7.03E-11 | 0.000 | 0.012 | 0.990 |
| TNF-related activation-induced cytokine levels | rs1432791 | T | C | 21.65 | -0.055 | 0.012 | 3.28E-06 | 0.004 | 0.011 | 0.700 |
| TNF-related activation-induced cytokine levels | rs150128402 | A | G | 27.02 | 0.239 | 0.046 | 2.01E-07 | 0.019 | 0.048 | 0.700 |
| TNF-related activation-induced cytokine levels | rs150416959 | C | G | 21.54 | 0.146 | 0.032 | 3.46E-06 | -0.021 | 0.026 | 0.400 |
| TNF-related activation-induced cytokine levels | rs17221073 | C | G | 28.23 | 0.265 | 0.050 | 1.08E-07 | -0.068 | 0.053 | 0.200 |
| TNF-related activation-induced cytokine levels | rs183217699 | C | G | 21.25 | -0.125 | 0.027 | 4.02E-06 | 0.045 | 0.027 | 0.100 |
| TNF-related activation-induced cytokine levels | rs2468187 | T | C | 188.02 | -0.162 | 0.012 | 8.62E-43 | 0.030 | 0.011 | 0.007 |
| TNF-related activation-induced cytokine levels | rs2975421 | T | G | 21.05 | -0.078 | 0.017 | 4.47E-06 | -0.031 | 0.015 | 0.038 |
| TNF-related activation-induced cytokine levels | rs34221978 | A | G | 23.57 | 0.167 | 0.034 | 1.21E-06 | 0.050 | 0.031 | 0.110 |
| TNF-related activation-induced cytokine levels | rs3801000 | A | G | 27.85 | 0.069 | 0.013 | 1.31E-07 | 0.011 | 0.012 | 0.380 |
| TNF-related activation-induced cytokine levels | rs4334157 | T | C | 22.38 | -0.168 | 0.036 | 2.24E-06 | -0.013 | 0.035 | 0.700 |
| TNF-related activation-induced cytokine levels | rs4365726 | A | G | 21.91 | -0.078 | 0.017 | 2.86E-06 | -0.017 | 0.015 | 0.250 |
| TNF-related activation-induced cytokine levels | rs4512994 | A | C | 102.08 | 0.117 | 0.012 | 5.33E-24 | 0.024 | 0.011 | 0.025 |
| TNF-related activation-induced cytokine levels | rs5001566 | A | T | 21.02 | 0.122 | 0.027 | 4.54E-06 | -0.134 | 0.026 | 0.000 |
| TNF-related activation-induced cytokine levels | rs6063153 | T | C | 25.48 | 0.064 | 0.013 | 4.47E-07 | -0.011 | 0.012 | 0.350 |
| TNF-related activation-induced cytokine levels | rs62501135 | A | G | 107.15 | -0.153 | 0.015 | 4.13E-25 | 0.016 | 0.014 | 0.250 |
| TNF-related activation-induced cytokine levels | rs6479556 | T | G | 22.37 | 0.070 | 0.015 | 2.25E-06 | 0.011 | 0.014 | 0.450 |
| TNF-related activation-induced cytokine levels | rs6932751 | A | G | 21.67 | 0.054 | 0.012 | 3.24E-06 | 0.003 | 0.011 | 0.810 |
| TNF-related activation-induced cytokine levels | rs72781813 | T | G | 23.74 | 0.237 | 0.049 | 1.10E-06 | -0.001 | 0.040 | 0.990 |
| TNF-related activation-induced cytokine levels | rs75991751 | T | G | 24.81 | -0.269 | 0.054 | 6.31E-07 | -0.059 | 0.046 | 0.200 |
| TNF-related activation-induced cytokine levels | rs76488966 | T | G | 22.06 | -0.172 | 0.037 | 2.64E-06 | 0.032 | 0.043 | 0.460 |
| TNF-related activation-induced cytokine levels | rs79287178 | A | G | 211.39 | -0.499 | 0.034 | 6.82E-48 | 0.030 | 0.034 | 0.390 |
| TNF-related apoptosis-inducing ligand levels | rs1065657 | A | G | 30.81 | 0.066 | 0.012 | 2.84E-08 | -0.009 | 0.011 | 0.410 |
| TNF-related apoptosis-inducing ligand levels | rs10745981 | A | T | 22.68 | -0.088 | 0.019 | 1.92E-06 | 0.000 | 0.017 | 0.990 |
| TNF-related apoptosis-inducing ligand levels | rs111257277 | A | G | 26.09 | 0.189 | 0.037 | 3.25E-07 | -0.010 | 0.034 | 0.780 |
| TNF-related apoptosis-inducing ligand levels | rs114597610 | T | C | 21.25 | -0.260 | 0.056 | 4.03E-06 | -0.044 | 0.050 | 0.380 |
| TNF-related apoptosis-inducing ligand levels | rs142889372 | C | G | 21.89 | -0.284 | 0.061 | 2.89E-06 | -0.003 | 0.052 | 0.950 |
| TNF-related apoptosis-inducing ligand levels | rs145386370 | T | G | 24.37 | 0.264 | 0.054 | 7.96E-07 | 0.021 | 0.051 | 0.680 |
| TNF-related apoptosis-inducing ligand levels | rs146922303 | T | C | 21.85 | 0.162 | 0.035 | 2.95E-06 | 0.006 | 0.034 | 0.870 |
| TNF-related apoptosis-inducing ligand levels | rs16840522 | T | C | 65.64 | -0.119 | 0.015 | 5.40E-16 | 0.013 | 0.014 | 0.360 |
| TNF-related apoptosis-inducing ligand levels | rs174533 | A | G | 42.30 | 0.079 | 0.012 | 7.81E-11 | -0.039 | 0.011 | 0.001 |
| TNF-related apoptosis-inducing ligand levels | rs17779404 | T | G | 23.85 | 0.067 | 0.014 | 1.04E-06 | 0.010 | 0.013 | 0.410 |
| TNF-related apoptosis-inducing ligand levels | rs180941492 | A | G | 24.70 | -0.244 | 0.049 | 6.71E-07 | -0.023 | 0.047 | 0.620 |
| TNF-related apoptosis-inducing ligand levels | rs1892247 | A | G | 22.89 | -0.076 | 0.016 | 1.71E-06 | -0.007 | 0.016 | 0.680 |
| TNF-related apoptosis-inducing ligand levels | rs2113173 | T | C | 22.71 | 0.069 | 0.015 | 1.88E-06 | -0.002 | 0.013 | 0.860 |
| TNF-related apoptosis-inducing ligand levels | rs2138380 | A | G | 23.49 | 0.088 | 0.018 | 1.26E-06 | 0.011 | 0.016 | 0.510 |
| TNF-related apoptosis-inducing ligand levels | rs2418781 | T | G | 21.11 | -0.145 | 0.032 | 4.33E-06 | 0.000 | 0.028 | 0.990 |
| TNF-related apoptosis-inducing ligand levels | rs28424593 | A | T | 22.08 | -0.131 | 0.028 | 2.62E-06 | -0.024 | 0.027 | 0.370 |
| TNF-related apoptosis-inducing ligand levels | rs28929474 | T | C | 231.32 | 0.669 | 0.044 | 3.08E-52 | 0.067 | 0.038 | 0.077 |
| TNF-related apoptosis-inducing ligand levels | rs4760 | A | G | 475.40 | 0.355 | 0.016 | 2.14E-105 | -0.018 | 0.015 | 0.220 |
| TNF-related apoptosis-inducing ligand levels | rs490342 | T | G | 39.19 | 0.125 | 0.020 | 3.85E-10 | 0.006 | 0.018 | 0.750 |
| TNF-related apoptosis-inducing ligand levels | rs5030044 | A | G | 232.28 | 0.285 | 0.019 | 1.90E-52 | 0.014 | 0.017 | 0.430 |
| TNF-related apoptosis-inducing ligand levels | rs654488 | A | T | 60.43 | -0.089 | 0.012 | 7.61E-15 | 0.011 | 0.011 | 0.300 |
| TNF-related apoptosis-inducing ligand levels | rs6969337 | T | C | 23.01 | 0.182 | 0.038 | 1.61E-06 | 0.002 | 0.036 | 0.950 |
| TNF-related apoptosis-inducing ligand levels | rs77303550 | T | C | 24.59 | -0.072 | 0.015 | 7.09E-07 | -0.023 | 0.014 | 0.100 |
| TNF-related apoptosis-inducing ligand levels | rs8178824 | T | C | 48.43 | 0.258 | 0.037 | 3.42E-12 | 0.017 | 0.032 | 0.600 |
| Transforming growth factor-alpha levels | rs11242125 | A | C | 21.02 | -0.076 | 0.017 | 4.55E-06 | -0.011 | 0.013 | 0.380 |
| Transforming growth factor-alpha levels | rs12270510 | T | C | 25.48 | 0.096 | 0.019 | 4.48E-07 | -0.022 | 0.018 | 0.220 |
| Transforming growth factor-alpha levels | rs1963491 | C | G | 22.09 | 0.108 | 0.023 | 2.60E-06 | 0.000 | 0.019 | 0.980 |
| Transforming growth factor-alpha levels | rs34007466 | A | G | 28.82 | -0.268 | 0.050 | 7.96E-08 | 0.040 | 0.044 | 0.360 |
| Transforming growth factor-alpha levels | rs34630685 | C | G | 21.61 | 0.168 | 0.036 | 3.35E-06 | -0.008 | 0.031 | 0.800 |
| Transforming growth factor-alpha levels | rs3859189 | A | G | 31.88 | 0.066 | 0.012 | 1.64E-08 | 0.022 | 0.011 | 0.046 |
| Transforming growth factor-alpha levels | rs4934441 | A | G | 23.02 | -0.095 | 0.020 | 1.60E-06 | 0.002 | 0.018 | 0.920 |
| Transforming growth factor-alpha levels | rs653178 | T | C | 29.21 | -0.071 | 0.013 | 6.50E-08 | 0.038 | 0.011 | 0.001 |
| Transforming growth factor-alpha levels | rs72912115 | A | T | 55.44 | 0.137 | 0.018 | 9.65E-14 | 0.006 | 0.017 | 0.730 |
| Transforming growth factor-alpha levels | rs78464136 | A | T | 21.70 | 0.143 | 0.031 | 3.19E-06 | -0.063 | 0.032 | 0.049 |
| Transforming growth factor-alpha levels | rs78912149 | C | G | 23.11 | -0.269 | 0.056 | 1.53E-06 | 0.004 | 0.047 | 0.940 |
| Transforming growth factor-alpha levels | rs9262670 | T | C | 24.12 | 0.072 | 0.015 | 9.06E-07 | 0.034 | 0.013 | 0.009 |
| Tumor necrosis factor levels | rs117427219 | A | G | 23.70 | -0.306 | 0.063 | 1.13E-06 | 0.009 | 0.051 | 0.860 |
| Tumor necrosis factor levels | rs12328100 | A | G | 24.92 | -0.065 | 0.013 | 5.97E-07 | 0.002 | 0.011 | 0.840 |
| Tumor necrosis factor levels | rs12354434 | A | G | 23.88 | -0.121 | 0.025 | 1.03E-06 | 0.049 | 0.020 | 0.018 |
| Tumor necrosis factor levels | rs1266163 | A | T | 22.69 | 0.137 | 0.029 | 1.90E-06 | -0.011 | 0.024 | 0.650 |
| Tumor necrosis factor levels | rs12975019 | C | G | 24.87 | -0.113 | 0.023 | 6.14E-07 | -0.051 | 0.018 | 0.004 |
| Tumor necrosis factor levels | rs1377015 | A | G | 21.15 | -0.065 | 0.014 | 4.25E-06 | 0.035 | 0.012 | 0.004 |
| Tumor necrosis factor levels | rs138684734 | A | G | 22.21 | 0.251 | 0.053 | 2.44E-06 | 0.020 | 0.048 | 0.670 |
| Tumor necrosis factor levels | rs141295666 | T | C | 26.62 | 0.341 | 0.066 | 2.48E-07 | 0.022 | 0.050 | 0.660 |
| Tumor necrosis factor levels | rs148560093 | A | G | 21.28 | -0.298 | 0.065 | 3.97E-06 | -0.007 | 0.051 | 0.890 |
| Tumor necrosis factor levels | rs333835 | A | T | 25.75 | 0.129 | 0.025 | 3.88E-07 | 0.002 | 0.021 | 0.930 |
| Tumor necrosis factor levels | rs4835254 | T | C | 23.95 | -0.152 | 0.031 | 9.90E-07 | -0.008 | 0.025 | 0.740 |
| Tumor necrosis factor levels | rs7621032 | T | C | 24.93 | 0.067 | 0.014 | 5.96E-07 | 0.001 | 0.011 | 0.950 |
| Tumor necrosis factor levels | rs7806921 | T | C | 21.40 | -0.061 | 0.013 | 3.73E-06 | -0.004 | 0.011 | 0.680 |
| Tumor necrosis factor levels | rs867063 | T | C | 21.23 | 0.118 | 0.026 | 4.07E-06 | -0.006 | 0.021 | 0.780 |
| Tumor necrosis factor levels | rs9614693 | T | C | 21.78 | 0.083 | 0.018 | 3.06E-06 | -0.005 | 0.015 | 0.720 |
| Tumor necrosis factor ligand superfamily member 12 levels | rs10831650 | A | G | 30.65 | 0.069 | 0.013 | 3.09E-08 | 0.010 | 0.011 | 0.350 |
| Tumor necrosis factor ligand superfamily member 12 levels | rs11738159 | T | C | 23.51 | 0.058 | 0.012 | 1.24E-06 | 0.018 | 0.011 | 0.098 |
| Tumor necrosis factor ligand superfamily member 12 levels | rs117550445 | C | G | 24.21 | -0.186 | 0.038 | 8.64E-07 | -0.032 | 0.035 | 0.360 |
| Tumor necrosis factor ligand superfamily member 12 levels | rs12145644 | A | T | 26.58 | -0.073 | 0.014 | 2.52E-07 | -0.012 | 0.013 | 0.330 |
| Tumor necrosis factor ligand superfamily member 12 levels | rs12726054 | A | G | 22.86 | 0.109 | 0.023 | 1.75E-06 | 0.021 | 0.021 | 0.330 |
| Tumor necrosis factor ligand superfamily member 12 levels | rs16879825 | A | G | 21.42 | -0.203 | 0.044 | 3.69E-06 | -0.045 | 0.048 | 0.350 |
| Tumor necrosis factor ligand superfamily member 12 levels | rs1965399 | A | G | 21.96 | -0.131 | 0.028 | 2.79E-06 | -0.054 | 0.026 | 0.039 |
| Tumor necrosis factor ligand superfamily member 12 levels | rs2163333 | A | G | 26.45 | 0.140 | 0.027 | 2.71E-07 | -0.033 | 0.025 | 0.200 |
| Tumor necrosis factor ligand superfamily member 12 levels | rs2738752 | A | G | 20.99 | -0.059 | 0.013 | 4.62E-06 | -0.043 | 0.011 | 0.000 |
| Tumor necrosis factor ligand superfamily member 12 levels | rs34790908 | T | C | 267.54 | 0.211 | 0.013 | 3.90E-60 | 0.000 | 0.012 | 0.980 |
| Tumor necrosis factor ligand superfamily member 12 levels | rs3821473 | A | G | 20.92 | -0.062 | 0.014 | 4.80E-06 | 0.009 | 0.013 | 0.510 |
| Tumor necrosis factor ligand superfamily member 12 levels | rs56023600 | T | C | 21.18 | -0.086 | 0.019 | 4.18E-06 | -0.006 | 0.017 | 0.720 |
| Tumor necrosis factor ligand superfamily member 12 levels | rs575752535 | T | C | 23.06 | -0.226 | 0.047 | 1.57E-06 | -0.012 | 0.041 | 0.780 |
| Tumor necrosis factor ligand superfamily member 12 levels | rs579459 | T | C | 48.91 | 0.110 | 0.016 | 2.68E-12 | 0.000 | 0.013 | 0.980 |
| Tumor necrosis factor ligand superfamily member 12 levels | rs58743186 | A | G | 21.68 | -0.072 | 0.015 | 3.23E-06 | 0.001 | 0.013 | 0.930 |
| Tumor necrosis factor ligand superfamily member 12 levels | rs7019909 | T | C | 21.60 | -0.090 | 0.019 | 3.36E-06 | 0.019 | 0.018 | 0.270 |
| Tumor necrosis factor ligand superfamily member 12 levels | rs73133996 | C | G | 45.79 | 0.081 | 0.012 | 1.32E-11 | 0.019 | 0.011 | 0.089 |
| Tumor necrosis factor ligand superfamily member 12 levels | rs7503751 | A | G | 33.91 | -0.139 | 0.024 | 5.76E-09 | -0.046 | 0.021 | 0.026 |
| Tumor necrosis factor ligand superfamily member 12 levels | rs76133364 | A | C | 26.40 | 0.190 | 0.037 | 2.77E-07 | -0.038 | 0.034 | 0.260 |
| Tumor necrosis factor ligand superfamily member 12 levels | rs78254232 | T | C | 21.37 | -0.211 | 0.046 | 3.79E-06 | -0.030 | 0.043 | 0.490 |
| Tumor necrosis factor ligand superfamily member 12 levels | rs826688 | A | T | 22.43 | -0.059 | 0.013 | 2.18E-06 | 0.003 | 0.011 | 0.780 |
| Tumor necrosis factor ligand superfamily member 12 levels | rs9842051 | C | G | 72.49 | 0.119 | 0.014 | 1.68E-17 | 0.005 | 0.012 | 0.680 |
| Tumor necrosis factor ligand superfamily member 14 levels | rs10211598 | T | C | 21.01 | -0.063 | 0.014 | 4.56E-06 | -0.001 | 0.012 | 0.930 |
| Tumor necrosis factor ligand superfamily member 14 levels | rs11085155 | A | G | 21.23 | -0.081 | 0.018 | 4.07E-06 | -0.005 | 0.015 | 0.720 |
| Tumor necrosis factor ligand superfamily member 14 levels | rs11569551 | A | G | 62.44 | 0.258 | 0.033 | 2.74E-15 | -0.018 | 0.027 | 0.500 |
| Tumor necrosis factor ligand superfamily member 14 levels | rs115950744 | A | G | 25.88 | -0.257 | 0.051 | 3.64E-07 | 0.071 | 0.037 | 0.055 |
| Tumor necrosis factor ligand superfamily member 14 levels | rs117442125 | A | T | 21.61 | 0.169 | 0.036 | 3.35E-06 | -0.039 | 0.028 | 0.160 |
| Tumor necrosis factor ligand superfamily member 14 levels | rs117720118 | T | G | 23.09 | -0.146 | 0.030 | 1.55E-06 | 0.021 | 0.024 | 0.380 |
| Tumor necrosis factor ligand superfamily member 14 levels | rs11950562 | A | C | 35.37 | 0.079 | 0.013 | 2.73E-09 | -0.030 | 0.011 | 0.006 |
| Tumor necrosis factor ligand superfamily member 14 levels | rs1461044 | T | C | 23.11 | -0.152 | 0.032 | 1.53E-06 | -0.020 | 0.031 | 0.510 |
| Tumor necrosis factor ligand superfamily member 14 levels | rs2738591 | T | C | 22.44 | -0.063 | 0.013 | 2.17E-06 | -0.011 | 0.011 | 0.310 |
| Tumor necrosis factor ligand superfamily member 14 levels | rs344560 | T | C | 321.37 | -0.489 | 0.027 | 7.29E-72 | -0.027 | 0.024 | 0.270 |
| Tumor necrosis factor ligand superfamily member 14 levels | rs34925583 | C | G | 21.09 | -0.070 | 0.015 | 4.39E-06 | -0.010 | 0.013 | 0.420 |
| Tumor necrosis factor ligand superfamily member 14 levels | rs4772260 | T | C | 21.02 | 0.062 | 0.014 | 4.54E-06 | -0.011 | 0.011 | 0.330 |
| Tumor necrosis factor ligand superfamily member 14 levels | rs59801342 | A | G | 21.23 | 0.229 | 0.050 | 4.07E-06 | -0.036 | 0.039 | 0.350 |
| Tumor necrosis factor ligand superfamily member 14 levels | rs74600570 | T | C | 22.82 | -0.226 | 0.047 | 1.77E-06 | 0.060 | 0.038 | 0.120 |
| Tumor necrosis factor ligand superfamily member 14 levels | rs76688046 | T | C | 23.04 | 0.103 | 0.022 | 1.59E-06 | -0.014 | 0.013 | 0.300 |
| Tumor necrosis factor ligand superfamily member 14 levels | rs76778362 | C | G | 24.24 | -0.212 | 0.043 | 8.51E-07 | 0.035 | 0.032 | 0.280 |
| Tumor necrosis factor ligand superfamily member 14 levels | rs7688836 | A | G | 24.28 | -0.082 | 0.017 | 8.32E-07 | -0.001 | 0.014 | 0.950 |
| Tumor necrosis factor ligand superfamily member 14 levels | rs78336300 | A | C | 21.00 | 0.239 | 0.052 | 4.60E-06 | -0.031 | 0.045 | 0.490 |
| Tumor necrosis factor ligand superfamily member 14 levels | rs79791117 | T | C | 20.90 | -0.234 | 0.051 | 4.84E-06 | 0.019 | 0.038 | 0.610 |
| Tumor necrosis factor ligand superfamily member 14 levels | rs9295562 | T | C | 21.32 | -0.065 | 0.014 | 3.89E-06 | 0.006 | 0.012 | 0.640 |
| Tumor necrosis factor ligand superfamily member 14 levels | rs9962377 | T | C | 23.67 | -0.091 | 0.019 | 1.14E-06 | -0.035 | 0.015 | 0.023 |
| Tumor necrosis factor receptor superfamily member 9 levels | rs10178845 | A | G | 22.43 | -0.068 | 0.014 | 2.18E-06 | 0.011 | 0.012 | 0.350 |
| Tumor necrosis factor receptor superfamily member 9 levels | rs10744409 | A | G | 23.87 | 0.064 | 0.013 | 1.03E-06 | 0.008 | 0.011 | 0.490 |
| Tumor necrosis factor receptor superfamily member 9 levels | rs11202989 | T | C | 22.03 | -0.100 | 0.021 | 2.69E-06 | -0.007 | 0.018 | 0.680 |
| Tumor necrosis factor receptor superfamily member 9 levels | rs118083884 | A | G | 24.17 | 0.328 | 0.067 | 8.83E-07 | -0.084 | 0.055 | 0.120 |
| Tumor necrosis factor receptor superfamily member 9 levels | rs12582121 | T | C | 22.83 | 0.065 | 0.014 | 1.77E-06 | 0.005 | 0.011 | 0.640 |
| Tumor necrosis factor receptor superfamily member 9 levels | rs12874404 | A | G | 22.43 | -0.140 | 0.030 | 2.17E-06 | 0.029 | 0.024 | 0.230 |
| Tumor necrosis factor receptor superfamily member 9 levels | rs140214797 | T | G | 21.13 | 0.232 | 0.050 | 4.28E-06 | 0.039 | 0.041 | 0.340 |
| Tumor necrosis factor receptor superfamily member 9 levels | rs1645331 | C | G | 22.17 | 0.097 | 0.021 | 2.49E-06 | -0.017 | 0.016 | 0.290 |
| Tumor necrosis factor receptor superfamily member 9 levels | rs1776354 | A | G | 100.15 | -0.130 | 0.013 | 1.41E-23 | 0.006 | 0.011 | 0.580 |
| Tumor necrosis factor receptor superfamily member 9 levels | rs1846520 | A | G | 26.99 | -0.163 | 0.031 | 2.05E-07 | 0.037 | 0.028 | 0.180 |
| Tumor necrosis factor receptor superfamily member 9 levels | rs2579649 | A | C | 23.66 | -0.097 | 0.020 | 1.15E-06 | 0.016 | 0.016 | 0.320 |
| Tumor necrosis factor receptor superfamily member 9 levels | rs2854008 | A | G | 38.62 | 0.093 | 0.015 | 5.14E-10 | 0.032 | 0.012 | 0.006 |
| Tumor necrosis factor receptor superfamily member 9 levels | rs4976685 | A | G | 24.86 | -0.069 | 0.014 | 6.18E-07 | -0.005 | 0.012 | 0.650 |
| Tumor necrosis factor receptor superfamily member 9 levels | rs57700441 | C | G | 25.66 | -0.116 | 0.023 | 4.07E-07 | 0.017 | 0.020 | 0.400 |
| Tumor necrosis factor receptor superfamily member 9 levels | rs72850206 | A | T | 26.19 | -0.144 | 0.028 | 3.10E-07 | 0.013 | 0.021 | 0.540 |
| Tumor necrosis factor receptor superfamily member 9 levels | rs72964492 | A | C | 22.91 | 0.311 | 0.065 | 1.70E-06 | -0.014 | 0.047 | 0.770 |
| Tumor necrosis factor receptor superfamily member 9 levels | rs75246422 | T | C | 23.40 | -0.098 | 0.020 | 1.32E-06 | -0.003 | 0.017 | 0.850 |
| Tumor necrosis factor receptor superfamily member 9 levels | rs76428106 | T | C | 20.95 | -0.271 | 0.059 | 4.72E-06 | 0.030 | 0.053 | 0.570 |
| Tumor necrosis factor receptor superfamily member 9 levels | rs7858310 | A | G | 21.63 | 0.071 | 0.015 | 3.30E-06 | 0.022 | 0.012 | 0.079 |
| Tumor necrosis factor receptor superfamily member 9 levels | rs9669611 | T | C | 21.96 | 0.070 | 0.015 | 2.78E-06 | 0.001 | 0.012 | 0.910 |
| Urokinase-type plasminogen activator levels | rs1074669 | A | G | 21.21 | -0.055 | 0.012 | 4.12E-06 | -0.003 | 0.011 | 0.810 |
| Urokinase-type plasminogen activator levels | rs10840566 | A | G | 25.92 | 0.078 | 0.015 | 3.56E-07 | -0.014 | 0.015 | 0.350 |
| Urokinase-type plasminogen activator levels | rs10992204 | A | G | 23.91 | 0.106 | 0.022 | 1.01E-06 | 0.001 | 0.019 | 0.960 |
| Urokinase-type plasminogen activator levels | rs11220462 | A | G | 40.45 | -0.102 | 0.016 | 2.01E-10 | -0.002 | 0.016 | 0.920 |
| Urokinase-type plasminogen activator levels | rs13299342 | A | G | 34.60 | 0.100 | 0.017 | 4.04E-09 | -0.012 | 0.016 | 0.450 |
| Urokinase-type plasminogen activator levels | rs2227575 | A | C | 67.67 | -0.095 | 0.012 | 1.93E-16 | 0.020 | 0.011 | 0.066 |
| Urokinase-type plasminogen activator levels | rs333947 | A | G | 22.36 | -0.079 | 0.017 | 2.26E-06 | 0.005 | 0.015 | 0.740 |
| Urokinase-type plasminogen activator levels | rs4251805 | T | C | 184.12 | -0.422 | 0.031 | 6.10E-42 | 0.026 | 0.030 | 0.390 |
| Urokinase-type plasminogen activator levels | rs4760 | A | G | 72.82 | 0.141 | 0.017 | 1.42E-17 | -0.018 | 0.015 | 0.220 |
| Urokinase-type plasminogen activator levels | rs4800787 | T | C | 56.55 | -0.094 | 0.013 | 5.48E-14 | 0.011 | 0.012 | 0.350 |
| Urokinase-type plasminogen activator levels | rs59772299 | T | G | 22.22 | 0.063 | 0.013 | 2.43E-06 | -0.006 | 0.013 | 0.650 |
| Urokinase-type plasminogen activator levels | rs62286554 | T | C | 22.94 | -0.091 | 0.019 | 1.67E-06 | -0.026 | 0.016 | 0.091 |
| Urokinase-type plasminogen activator levels | rs72727847 | C | G | 22.27 | 0.197 | 0.042 | 2.37E-06 | -0.019 | 0.051 | 0.710 |
| Urokinase-type plasminogen activator levels | rs7406661 | T | C | 50.36 | -0.111 | 0.016 | 1.28E-12 | 0.009 | 0.014 | 0.540 |
| Urokinase-type plasminogen activator levels | rs74607099 | A | G | 21.82 | -0.182 | 0.039 | 3.00E-06 | 0.000 | 0.042 | 0.990 |
| Urokinase-type plasminogen activator levels | rs7564243 | A | G | 55.86 | -0.085 | 0.011 | 7.80E-14 | -0.016 | 0.011 | 0.140 |
| Vascular endothelial growth factor A levels | rs10822155 | A | C | 51.30 | 0.084 | 0.012 | 7.93E-13 | 0.010 | 0.011 | 0.370 |
| Vascular endothelial growth factor A levels | rs114694170 | T | C | 37.04 | -0.163 | 0.027 | 1.16E-09 | -0.018 | 0.023 | 0.450 |
| Vascular endothelial growth factor A levels | rs117976551 | C | G | 23.21 | -0.216 | 0.045 | 1.45E-06 | 0.006 | 0.032 | 0.860 |
| Vascular endothelial growth factor A levels | rs11953790 | T | C | 24.26 | -0.184 | 0.037 | 8.43E-07 | -0.049 | 0.033 | 0.130 |
| Vascular endothelial growth factor A levels | rs1203834 | T | C | 21.53 | 0.117 | 0.025 | 3.48E-06 | 0.047 | 0.021 | 0.028 |
| Vascular endothelial growth factor A levels | rs1208181 | T | C | 22.65 | -0.079 | 0.017 | 1.95E-06 | 0.007 | 0.015 | 0.630 |
| Vascular endothelial growth factor A levels | rs138648222 | C | G | 24.90 | 0.198 | 0.040 | 6.04E-07 | -0.022 | 0.033 | 0.490 |
| Vascular endothelial growth factor A levels | rs144037665 | A | C | 21.24 | -0.278 | 0.060 | 4.05E-06 | 0.025 | 0.052 | 0.630 |
| Vascular endothelial growth factor A levels | rs145846107 | T | C | 22.10 | 0.274 | 0.058 | 2.59E-06 | 0.014 | 0.047 | 0.770 |
| Vascular endothelial growth factor A levels | rs16883415 | T | C | 23.17 | -0.220 | 0.046 | 1.48E-06 | 0.058 | 0.054 | 0.280 |
| Vascular endothelial growth factor A levels | rs2050256 | A | G | 23.32 | -0.073 | 0.015 | 1.37E-06 | -0.002 | 0.014 | 0.880 |
| Vascular endothelial growth factor A levels | rs34536806 | T | G | 22.75 | 0.099 | 0.021 | 1.85E-06 | 0.024 | 0.021 | 0.250 |
| Vascular endothelial growth factor A levels | rs34562990 | A | C | 27.91 | 0.067 | 0.013 | 1.27E-07 | -0.010 | 0.012 | 0.390 |
| Vascular endothelial growth factor A levels | rs4349809 | T | G | 1420.56 | 0.426 | 0.011 | 1.00E-200 | -0.005 | 0.011 | 0.650 |
| Vascular endothelial growth factor A levels | rs4875579 | C | G | 21.99 | -0.074 | 0.016 | 2.73E-06 | 0.017 | 0.014 | 0.230 |
| Vascular endothelial growth factor A levels | rs61818787 | T | C | 26.30 | -0.076 | 0.015 | 2.92E-07 | 0.019 | 0.014 | 0.180 |
| Vascular endothelial growth factor A levels | rs62401205 | A | C | 40.23 | -0.211 | 0.033 | 2.26E-10 | -0.052 | 0.030 | 0.085 |
| Vascular endothelial growth factor A levels | rs6475938 | A | T | 115.61 | 0.134 | 0.013 | 5.80E-27 | 0.011 | 0.011 | 0.320 |
| Vascular endothelial growth factor A levels | rs6582666 | C | G | 23.62 | -0.129 | 0.027 | 1.17E-06 | 0.016 | 0.022 | 0.450 |
| Vascular endothelial growth factor A levels | rs6993770 | A | T | 84.39 | 0.123 | 0.013 | 4.06E-20 | -0.006 | 0.012 | 0.610 |
| Vascular endothelial growth factor A levels | rs7688836 | A | G | 22.32 | -0.069 | 0.015 | 2.31E-06 | -0.001 | 0.014 | 0.950 |
|  |

MR, Mendelian randomization; BCC, basal cell carcinoma; SNP, single nucleotide polymorphism; SE, standard error.

| **Table S2 Full result of MR estimates for the association between Circulating Inflammatory Proteins and BCC.** | | | | | |
| --- | --- | --- | --- | --- | --- |
| **Inflammatory protein(exposure)** | **MR method** | **Num of SNP** | **OR(95%CI)** | **P-value** | **Q-value** |
| Adenosine Deaminase levels | IVW | 9 | 1(0.92-1.09) | 9.42E-01 | 1.00 |
| Adenosine Deaminase levels | MR Egger | 9 | 0.97(0.87-1.08) | 5.94E-01 | 0.69 |
| Adenosine Deaminase levels | WM | 9 | 0.98(0.9-1.06) | 6.27E-01 | 1.00 |
| Adenosine Deaminase levels | ML | 9 | 1(0.93-1.08) | 9.30E-01 | 0.95 |
| Artemin levels | IVW | 12 | 0.91(0.82-1.02) | 9.32E-02 | 0.76 |
| Artemin levels | MR Egger | 12 | 1.08(0.8-1.44) | 6.34E-01 | 0.69 |
| Artemin levels | WM | 12 | 0.9(0.78-1.03) | 1.23E-01 | 0.85 |
| Artemin levels | ML | 12 | 0.91(0.82-1.01) | 7.02E-02 | 0.54 |
| Axin-1 levels | IVW | 6 | 0.91(0.8-1.04) | 1.85E-01 | 0.76 |
| Axin-1 levels | MR Egger | 6 | 0.89(0.64-1.22) | 5.04E-01 | 0.69 |
| Axin-1 levels | WM | 6 | 0.93(0.78-1.1) | 3.97E-01 | 0.92 |
| Axin-1 levels | ML | 6 | 0.91(0.8-1.05) | 1.85E-01 | 0.56 |
| beta-nerve growth factor levels | IVW | 16 | 0.99(0.86-1.13) | 8.39E-01 | 1.00 |
| beta-nerve growth factor levels | MR Egger | 16 | 1.1(0.77-1.58) | 6.10E-01 | 0.69 |
| beta-nerve growth factor levels | WM | 16 | 1.04(0.89-1.21) | 6.47E-01 | 1.00 |
| beta-nerve growth factor levels | ML | 16 | 0.99(0.89-1.09) | 7.72E-01 | 0.93 |
| Caspase 8 levels | IVW | 6 | 0.98(0.81-1.17) | 8.10E-01 | 1.00 |
| Caspase 8 levels | MR Egger | 6 | 0.79(0.6-1.04) | 1.63E-01 | 0.66 |
| Caspase 8 levels | WM | 6 | 0.93(0.77-1.14) | 4.93E-01 | 0.99 |
| Caspase 8 levels | ML | 6 | 0.98(0.85-1.12) | 7.40E-01 | 0.93 |
| C-C motif chemokine 19 levels | IVW | 10 | 0.95(0.87-1.02) | 1.67E-01 | 0.76 |
| C-C motif chemokine 19 levels | MR Egger | 10 | 0.93(0.79-1.1) | 4.19E-01 | 0.69 |
| C-C motif chemokine 19 levels | WM | 10 | 0.93(0.84-1.02) | 1.38E-01 | 0.85 |
| C-C motif chemokine 19 levels | ML | 10 | 0.94(0.87-1.02) | 1.67E-01 | 0.56 |
| C-C motif chemokine 20 levels | IVW | 16 | 1(0.91-1.09) | 9.97E-01 | 1.00 |
| C-C motif chemokine 20 levels | MR Egger | 16 | 0.88(0.69-1.11) | 2.91E-01 | 0.67 |
| C-C motif chemokine 20 levels | WM | 16 | 0.98(0.87-1.11) | 7.80E-01 | 1.00 |
| C-C motif chemokine 20 levels | ML | 16 | 1(0.92-1.09) | 9.97E-01 | 0.96 |
| C-C motif chemokine 23 levels | IVW | 19 | 0.97(0.91-1.03) | 2.86E-01 | 0.77 |
| C-C motif chemokine 23 levels | MR Egger | 19 | 0.97(0.89-1.06) | 5.07E-01 | 0.69 |
| C-C motif chemokine 23 levels | WM | 19 | 0.96(0.9-1.01) | 1.45E-01 | 0.85 |
| C-C motif chemokine 23 levels | ML | 19 | 0.97(0.92-1.02) | 1.96E-01 | 0.56 |
| C-C motif chemokine 25 levels | IVW | 21 | 1.02(0.99-1.05) | 2.25E-01 | 0.76 |
| C-C motif chemokine 25 levels | MR Egger | 21 | 1.04(1-1.09) | 5.73E-02 | 0.55 |
| C-C motif chemokine 25 levels | WM | 21 | 1.03(1-1.07) | 8.69E-02 | 0.85 |
| C-C motif chemokine 25 levels | ML | 21 | 1.02(0.99-1.05) | 2.28E-01 | 0.56 |
| C-C motif chemokine 28 levels | IVW | 14 | 0.9(0.81-1) | 5.38E-02 | 0.76 |
| C-C motif chemokine 28 levels | MR Egger | 14 | 0.97(0.76-1.22) | 7.83E-01 | 0.73 |
| C-C motif chemokine 28 levels | WM | 14 | 0.87(0.76-1) | 4.44E-02 | 0.85 |
| C-C motif chemokine 28 levels | ML | 14 | 0.9(0.82-0.99) | 3.93E-02 | 0.54 |
| C-C motif chemokine 4 levels | IVW | 14 | 0.93(0.89-0.97) | 9.41E-04 | 0.09 |
| C-C motif chemokine 4 levels | MR Egger | 14 | 0.9(0.84-0.96) | 6.85E-03 | 0.47 |
| C-C motif chemokine 4 levels | WM | 14 | 0.91(0.87-0.96) | 4.25E-04 | 0.04 |
| C-C motif chemokine 4 levels | ML | 14 | 0.93(0.89-0.97) | 9.53E-04 | 0.04 |
| CD40L receptor levels | IVW | 10 | 1(0.94-1.05) | 9.43E-01 | 1.00 |
| CD40L receptor levels | MR Egger | 10 | 1.02(0.94-1.1) | 7.13E-01 | 0.70 |
| CD40L receptor levels | WM | 10 | 1.01(0.95-1.06) | 8.23E-01 | 1.00 |
| CD40L receptor levels | ML | 10 | 1(0.95-1.05) | 9.35E-01 | 0.95 |
| CUB domain-containing protein 1 levels | IVW | 15 | 1.03(0.94-1.13) | 5.58E-01 | 0.94 |
| CUB domain-containing protein 1 levels | MR Egger | 15 | 0.86(0.7-1.06) | 1.92E-01 | 0.67 |
| CUB domain-containing protein 1 levels | WM | 15 | 1.03(0.92-1.14) | 6.55E-01 | 1.00 |
| CUB domain-containing protein 1 levels | ML | 15 | 1.03(0.95-1.11) | 4.71E-01 | 0.82 |
| C-X-C motif chemokine 1 levels | IVW | 8 | 1.03(0.93-1.13) | 6.12E-01 | 0.98 |
| C-X-C motif chemokine 1 levels | MR Egger | 8 | 1.08(0.93-1.25) | 3.55E-01 | 0.68 |
| C-X-C motif chemokine 1 levels | WM | 8 | 1.03(0.96-1.12) | 4.04E-01 | 0.92 |
| C-X-C motif chemokine 1 levels | ML | 8 | 1.03(0.95-1.1) | 4.98E-01 | 0.82 |
| C-X-C motif chemokine 10 levels | IVW | 19 | 0.95(0.87-1.04) | 2.83E-01 | 0.77 |
| C-X-C motif chemokine 10 levels | MR Egger | 19 | 0.99(0.85-1.16) | 9.42E-01 | 0.73 |
| C-X-C motif chemokine 10 levels | WM | 19 | 0.97(0.87-1.07) | 5.49E-01 | 1.00 |
| C-X-C motif chemokine 10 levels | ML | 19 | 0.95(0.89-1.01) | 1.27E-01 | 0.54 |
| C-X-C motif chemokine 11 levels | IVW | 19 | 0.99(0.9-1.08) | 7.72E-01 | 1.00 |
| C-X-C motif chemokine 11 levels | MR Egger | 19 | 1.01(0.79-1.28) | 9.51E-01 | 0.73 |
| C-X-C motif chemokine 11 levels | WM | 19 | 1.07(0.97-1.19) | 1.77E-01 | 0.86 |
| C-X-C motif chemokine 11 levels | ML | 19 | 0.99(0.92-1.06) | 7.06E-01 | 0.93 |
| C-X-C motif chemokine 5 levels | IVW | 11 | 1(0.91-1.1) | 9.74E-01 | 1.00 |
| C-X-C motif chemokine 5 levels | MR Egger | 11 | 1.01(0.87-1.16) | 9.19E-01 | 0.73 |
| C-X-C motif chemokine 5 levels | WM | 11 | 1(0.94-1.06) | 9.53E-01 | 1.00 |
| C-X-C motif chemokine 5 levels | ML | 11 | 1(0.95-1.06) | 9.54E-01 | 0.95 |
| C-X-C motif chemokine 6 levels | IVW | 8 | 0.93(0.78-1.09) | 3.67E-01 | 0.82 |
| C-X-C motif chemokine 6 levels | MR Egger | 8 | 1.13(0.72-1.77) | 6.14E-01 | 0.69 |
| C-X-C motif chemokine 6 levels | WM | 8 | 0.99(0.85-1.16) | 9.06E-01 | 1.00 |
| C-X-C motif chemokine 6 levels | ML | 8 | 0.92(0.82-1.03) | 1.57E-01 | 0.56 |
| C-X-C motif chemokine 9 levels | IVW | 18 | 0.92(0.77-1.11) | 3.99E-01 | 0.82 |
| C-X-C motif chemokine 9 levels | MR Egger | 18 | 1.02(0.65-1.59) | 9.41E-01 | 0.73 |
| C-X-C motif chemokine 9 levels | WM | 18 | 1.02(0.9-1.14) | 7.88E-01 | 1.00 |
| C-X-C motif chemokine 9 levels | ML | 18 | 0.91(0.84-0.99) | 3.12E-02 | 0.54 |
| Cystatin D levels | IVW | 26 | 1.01(0.97-1.05) | 6.04E-01 | 0.98 |
| Cystatin D levels | MR Egger | 26 | 0.99(0.95-1.04) | 6.66E-01 | 0.69 |
| Cystatin D levels | WM | 26 | 1(0.96-1.04) | 9.80E-01 | 1.00 |
| Cystatin D levels | ML | 26 | 1.01(0.97-1.05) | 6.03E-01 | 0.88 |
| Delta and Notch-like epidermal growth factor-related receptor levels | IVW | 10 | 0.96(0.86-1.07) | 4.29E-01 | 0.82 |
| Delta and Notch-like epidermal growth factor-related receptor levels | MR Egger | 10 | 1.19(0.85-1.67) | 3.32E-01 | 0.67 |
| Delta and Notch-like epidermal growth factor-related receptor levels | WM | 10 | 1(0.87-1.15) | 9.55E-01 | 1.00 |
| Delta and Notch-like epidermal growth factor-related receptor levels | ML | 10 | 0.96(0.86-1.07) | 4.16E-01 | 0.76 |
| Eotaxin levels | IVW | 15 | 0.98(0.86-1.11) | 7.46E-01 | 1.00 |
| Eotaxin levels | MR Egger | 15 | 0.87(0.68-1.13) | 3.21E-01 | 0.67 |
| Eotaxin levels | WM | 15 | 0.92(0.83-1.01) | 8.99E-02 | 0.85 |
| Eotaxin levels | ML | 15 | 0.98(0.91-1.05) | 5.74E-01 | 0.87 |
| Eukaryotic translation initiation factor 4E-binding protein 1 levels | IVW | 8 | 1.04(0.94-1.15) | 4.19E-01 | 0.82 |
| Eukaryotic translation initiation factor 4E-binding protein 1 levels | MR Egger | 8 | 1.03(0.8-1.34) | 8.03E-01 | 0.73 |
| Eukaryotic translation initiation factor 4E-binding protein 1 levels | WM | 8 | 1.01(0.89-1.15) | 8.35E-01 | 1.00 |
| Eukaryotic translation initiation factor 4E-binding protein 1 levels | ML | 8 | 1.04(0.94-1.16) | 4.16E-01 | 0.76 |
| Fibroblast growth factor 19 levels | IVW | 18 | 1.06(0.98-1.14) | 1.53E-01 | 0.76 |
| Fibroblast growth factor 19 levels | MR Egger | 18 | 1.14(0.94-1.39) | 1.96E-01 | 0.67 |
| Fibroblast growth factor 19 levels | WM | 18 | 1.09(0.99-1.2) | 8.60E-02 | 0.85 |
| Fibroblast growth factor 19 levels | ML | 18 | 1.06(0.99-1.14) | 1.10E-01 | 0.54 |
| Fibroblast growth factor 21 levels | IVW | 11 | 0.98(0.9-1.08) | 7.23E-01 | 1.00 |
| Fibroblast growth factor 21 levels | MR Egger | 11 | 1.04(0.83-1.31) | 7.57E-01 | 0.72 |
| Fibroblast growth factor 21 levels | WM | 11 | 1(0.89-1.14) | 9.59E-01 | 1.00 |
| Fibroblast growth factor 21 levels | ML | 11 | 0.98(0.9-1.07) | 7.10E-01 | 0.93 |
| Fibroblast growth factor 23 levels | IVW | 9 | 0.92(0.82-1.04) | 1.66E-01 | 0.76 |
| Fibroblast growth factor 23 levels | MR Egger | 9 | 1.12(0.78-1.62) | 5.56E-01 | 0.69 |
| Fibroblast growth factor 23 levels | WM | 9 | 0.91(0.77-1.07) | 2.39E-01 | 0.86 |
| Fibroblast growth factor 23 levels | ML | 9 | 0.92(0.81-1.04) | 1.63E-01 | 0.56 |
| Fibroblast growth factor 5 levels | IVW | 18 | 1.04(0.99-1.08) | 8.90E-02 | 0.76 |
| Fibroblast growth factor 5 levels | MR Egger | 18 | 1.05(1-1.11) | 9.23E-02 | 0.65 |
| Fibroblast growth factor 5 levels | WM | 18 | 1.04(0.99-1.09) | 1.12E-01 | 0.85 |
| Fibroblast growth factor 5 levels | ML | 18 | 1.04(1-1.08) | 8.55E-02 | 0.54 |
| Fms-related tyrosine kinase 3 ligand levels | IVW | 20 | 0.9(0.8-1) | 5.97E-02 | 0.76 |
| Fms-related tyrosine kinase 3 ligand levels | MR Egger | 20 | 0.99(0.83-1.19) | 9.46E-01 | 0.73 |
| Fms-related tyrosine kinase 3 ligand levels | WM | 20 | 0.97(0.88-1.06) | 4.43E-01 | 0.92 |
| Fms-related tyrosine kinase 3 ligand levels | ML | 20 | 0.89(0.84-0.95) | 2.36E-04 | 0.02 |
| Fractalkine levels | IVW | 18 | 1.09(1.01-1.18) | 3.72E-02 | 0.76 |
| Fractalkine levels | MR Egger | 18 | 1.3(1.05-1.62) | 2.67E-02 | 0.55 |
| Fractalkine levels | WM | 18 | 1.07(0.95-1.2) | 2.70E-01 | 0.86 |
| Fractalkine levels | ML | 18 | 1.09(1.01-1.19) | 3.45E-02 | 0.54 |
| Glial cell line-derived neurotrophic factor levels | IVW | 10 | 0.93(0.87-1) | 6.06E-02 | 0.76 |
| Glial cell line-derived neurotrophic factor levels | MR Egger | 10 | 1.01(0.89-1.15) | 8.75E-01 | 0.73 |
| Glial cell line-derived neurotrophic factor levels | WM | 10 | 0.95(0.87-1.04) | 2.93E-01 | 0.89 |
| Glial cell line-derived neurotrophic factor levels | ML | 10 | 0.93(0.87-1) | 6.05E-02 | 0.54 |
| Hepatocyte growth factor levels | IVW | 10 | 1.05(0.94-1.17) | 4.27E-01 | 0.82 |
| Hepatocyte growth factor levels | MR Egger | 10 | 1.08(0.85-1.38) | 5.50E-01 | 0.69 |
| Hepatocyte growth factor levels | WM | 10 | 1.03(0.89-1.19) | 6.78E-01 | 1.00 |
| Hepatocyte growth factor levels | ML | 10 | 1.05(0.94-1.17) | 4.12E-01 | 0.76 |
| Interferon gamma levels | IVW | 4 | 0.95(0.8-1.13) | 5.48E-01 | 0.94 |
| Interferon gamma levels | MR Egger | 4 | 0.77(0.53-1.13) | 3.11E-01 | 0.67 |
| Interferon gamma levels | WM | 4 | 1(0.81-1.24) | 9.79E-01 | 1.00 |
| Interferon gamma levels | ML | 4 | 0.95(0.8-1.12) | 5.20E-01 | 0.82 |
| Interleukin-10 levels | IVW | 12 | 0.96(0.87-1.06) | 3.81E-01 | 0.82 |
| Interleukin-10 levels | MR Egger | 12 | 1.13(0.92-1.38) | 2.73E-01 | 0.67 |
| Interleukin-10 levels | WM | 12 | 1(0.88-1.14) | 1.00E+00 | 1.00 |
| Interleukin-10 levels | ML | 12 | 0.96(0.87-1.05) | 3.56E-01 | 0.71 |
| Interleukin-10 receptor subunit alpha levels | IVW | 7 | 1.01(0.85-1.2) | 9.36E-01 | 1.00 |
| Interleukin-10 receptor subunit alpha levels | MR Egger | 7 | 0.72(0.49-1.04) | 1.39E-01 | 0.66 |
| Interleukin-10 receptor subunit alpha levels | WM | 7 | 1.02(0.87-1.21) | 7.81E-01 | 1.00 |
| Interleukin-10 receptor subunit alpha levels | ML | 7 | 1.01(0.88-1.15) | 9.10E-01 | 0.95 |
| Interleukin-10 receptor subunit beta levels | IVW | 14 | 0.96(0.9-1.02) | 2.11E-01 | 0.76 |
| Interleukin-10 receptor subunit beta levels | MR Egger | 14 | 0.99(0.91-1.08) | 8.35E-01 | 0.73 |
| Interleukin-10 receptor subunit beta levels | WM | 14 | 0.96(0.91-1.01) | 1.40E-01 | 0.85 |
| Interleukin-10 receptor subunit beta levels | ML | 14 | 0.96(0.92-1.01) | 1.20E-01 | 0.54 |
| Interleukin-12 subunit beta levels | IVW | 20 | 1.02(0.97-1.08) | 4.09E-01 | 0.82 |
| Interleukin-12 subunit beta levels | MR Egger | 20 | 1.06(0.98-1.14) | 1.61E-01 | 0.66 |
| Interleukin-12 subunit beta levels | WM | 20 | 1.04(1-1.09) | 7.96E-02 | 0.85 |
| Interleukin-12 subunit beta levels | ML | 20 | 1.02(0.98-1.06) | 2.75E-01 | 0.60 |
| Interleukin-13 levels | IVW | 10 | 0.94(0.84-1.04) | 2.41E-01 | 0.77 |
| Interleukin-13 levels | MR Egger | 10 | 1.09(0.81-1.46) | 5.72E-01 | 0.69 |
| Interleukin-13 levels | WM | 10 | 0.94(0.82-1.08) | 3.87E-01 | 0.92 |
| Interleukin-13 levels | ML | 10 | 0.94(0.84-1.04) | 2.36E-01 | 0.56 |
| Interleukin-15 receptor subunit alpha levels | IVW | 8 | 1.01(0.88-1.15) | 9.39E-01 | 1.00 |
| Interleukin-15 receptor subunit alpha levels | MR Egger | 8 | 1.12(0.89-1.42) | 3.66E-01 | 0.68 |
| Interleukin-15 receptor subunit alpha levels | WM | 8 | 1.02(0.97-1.08) | 3.93E-01 | 0.92 |
| Interleukin-15 receptor subunit alpha levels | ML | 8 | 1.01(0.96-1.06) | 8.32E-01 | 0.94 |
| Interleukin-17A levels | IVW | 11 | 0.98(0.86-1.12) | 8.07E-01 | 1.00 |
| Interleukin-17A levels | MR Egger | 11 | 1.35(1.07-1.7) | 3.18E-02 | 0.55 |
| Interleukin-17A levels | WM | 11 | 0.98(0.85-1.14) | 8.38E-01 | 1.00 |
| Interleukin-17A levels | ML | 11 | 0.98(0.88-1.09) | 7.50E-01 | 0.93 |
| Interleukin-17C levels | IVW | 13 | 1.03(0.94-1.12) | 5.38E-01 | 0.94 |
| Interleukin-17C levels | MR Egger | 13 | 1.11(0.86-1.43) | 4.31E-01 | 0.69 |
| Interleukin-17C levels | WM | 13 | 1.02(0.91-1.15) | 6.99E-01 | 1.00 |
| Interleukin-17C levels | ML | 13 | 1.03(0.94-1.12) | 5.23E-01 | 0.82 |
| Interleukin-18 levels | IVW | 12 | 0.96(0.89-1.03) | 2.80E-01 | 0.77 |
| Interleukin-18 levels | MR Egger | 12 | 0.82(0.7-0.96) | 3.11E-02 | 0.55 |
| Interleukin-18 levels | WM | 12 | 0.94(0.86-1.02) | 1.35E-01 | 0.85 |
| Interleukin-18 levels | ML | 12 | 0.96(0.9-1.03) | 2.53E-01 | 0.57 |
| interleukin-18 receptor 1 levels | IVW | 18 | 0.99(0.93-1.05) | 6.57E-01 | 1.00 |
| interleukin-18 receptor 1 levels | MR Egger | 18 | 0.97(0.86-1.09) | 6.48E-01 | 0.69 |
| interleukin-18 receptor 1 levels | WM | 18 | 0.96(0.91-1.02) | 1.50E-01 | 0.85 |
| interleukin-18 receptor 1 levels | ML | 18 | 0.99(0.94-1.03) | 5.61E-01 | 0.87 |
| Interleukin-1-alpha levels | IVW | 9 | 1.06(0.92-1.23) | 4.31E-01 | 0.82 |
| Interleukin-1-alpha levels | MR Egger | 9 | 1.32(1.06-1.65) | 4.32E-02 | 0.55 |
| Interleukin-1-alpha levels | WM | 9 | 0.99(0.85-1.16) | 9.27E-01 | 1.00 |
| Interleukin-1-alpha levels | ML | 9 | 1.07(0.96-1.18) | 2.09E-01 | 0.56 |
| Interleukin-2 levels | IVW | 13 | 0.94(0.84-1.06) | 3.08E-01 | 0.80 |
| Interleukin-2 levels | MR Egger | 13 | 0.87(0.64-1.18) | 3.84E-01 | 0.68 |
| Interleukin-2 levels | WM | 13 | 1(0.87-1.15) | 9.61E-01 | 1.00 |
| Interleukin-2 levels | ML | 13 | 0.94(0.85-1.04) | 2.21E-01 | 0.56 |
| Interleukin-2 receptor subunit beta levels | IVW | 9 | 0.99(0.87-1.14) | 9.32E-01 | 1.00 |
| Interleukin-2 receptor subunit beta levels | MR Egger | 9 | 0.98(0.72-1.33) | 8.93E-01 | 0.73 |
| Interleukin-2 receptor subunit beta levels | WM | 9 | 1.03(0.88-1.21) | 7.15E-01 | 1.00 |
| Interleukin-2 receptor subunit beta levels | ML | 9 | 0.99(0.89-1.12) | 9.16E-01 | 0.95 |
| Interleukin-20 levels | IVW | 10 | 1.01(0.91-1.12) | 8.85E-01 | 1.00 |
| Interleukin-20 levels | MR Egger | 10 | 1.18(0.96-1.45) | 1.53E-01 | 0.66 |
| Interleukin-20 levels | WM | 10 | 1.07(0.93-1.24) | 3.29E-01 | 0.91 |
| Interleukin-20 levels | ML | 10 | 1.01(0.91-1.12) | 8.80E-01 | 0.95 |
| Interleukin-20 receptor subunit alpha levels | IVW | 6 | 0.92(0.8-1.05) | 2.12E-01 | 0.76 |
| Interleukin-20 receptor subunit alpha levels | MR Egger | 6 | 1(0.72-1.39) | 9.89E-01 | 0.75 |
| Interleukin-20 receptor subunit alpha levels | WM | 6 | 0.95(0.81-1.12) | 5.34E-01 | 1.00 |
| Interleukin-20 receptor subunit alpha levels | ML | 6 | 0.92(0.8-1.05) | 2.12E-01 | 0.56 |
| Interleukin-22 receptor subunit alpha-1 levels | IVW | 10 | 0.97(0.85-1.11) | 6.85E-01 | 1.00 |
| Interleukin-22 receptor subunit alpha-1 levels | MR Egger | 10 | 0.87(0.68-1.12) | 3.24E-01 | 0.67 |
| Interleukin-22 receptor subunit alpha-1 levels | WM | 10 | 1.01(0.87-1.17) | 9.22E-01 | 1.00 |
| Interleukin-22 receptor subunit alpha-1 levels | ML | 10 | 0.97(0.87-1.08) | 6.02E-01 | 0.88 |
| Interleukin-24 levels | IVW | 8 | 0.9(0.8-1.01) | 8.65E-02 | 0.76 |
| Interleukin-24 levels | MR Egger | 8 | 0.9(0.69-1.17) | 4.48E-01 | 0.69 |
| Interleukin-24 levels | WM | 8 | 0.95(0.82-1.12) | 5.58E-01 | 1.00 |
| Interleukin-24 levels | ML | 8 | 0.9(0.8-1.02) | 8.58E-02 | 0.54 |
| Interleukin-33 levels | IVW | 7 | 0.99(0.87-1.13) | 8.64E-01 | 1.00 |
| Interleukin-33 levels | MR Egger | 7 | 1.56(0.92-2.64) | 1.57E-01 | 0.66 |
| Interleukin-33 levels | WM | 7 | 0.99(0.83-1.16) | 8.62E-01 | 1.00 |
| Interleukin-33 levels | ML | 7 | 0.99(0.87-1.12) | 8.48E-01 | 0.94 |
| Interleukin-4 levels | IVW | 9 | 0.91(0.81-1.04) | 1.56E-01 | 0.76 |
| Interleukin-4 levels | MR Egger | 9 | 1.35(1.03-1.76) | 6.43E-02 | 0.55 |
| Interleukin-4 levels | WM | 9 | 0.95(0.82-1.1) | 4.99E-01 | 0.99 |
| Interleukin-4 levels | ML | 9 | 0.91(0.82-1.01) | 8.35E-02 | 0.54 |
| Interleukin-5 levels | IVW | 9 | 0.93(0.83-1.04) | 2.17E-01 | 0.76 |
| Interleukin-5 levels | MR Egger | 9 | 0.93(0.67-1.3) | 6.92E-01 | 0.70 |
| Interleukin-5 levels | WM | 9 | 0.99(0.85-1.15) | 8.57E-01 | 1.00 |
| Interleukin-5 levels | ML | 9 | 0.93(0.83-1.04) | 1.80E-01 | 0.56 |
| Interleukin-6 levels | IVW | 6 | 0.98(0.88-1.08) | 6.36E-01 | 1.00 |
| Interleukin-6 levels | MR Egger | 6 | 0.97(0.77-1.22) | 8.31E-01 | 0.73 |
| Interleukin-6 levels | WM | 6 | 0.99(0.87-1.12) | 8.52E-01 | 1.00 |
| Interleukin-6 levels | ML | 6 | 0.98(0.88-1.08) | 6.35E-01 | 0.92 |
| Interleukin-7 levels | IVW | 12 | 1(0.87-1.15) | 9.90E-01 | 1.00 |
| Interleukin-7 levels | MR Egger | 12 | 1.37(1.03-1.83) | 5.64E-02 | 0.55 |
| Interleukin-7 levels | WM | 12 | 1.06(0.92-1.21) | 4.41E-01 | 0.92 |
| Interleukin-7 levels | ML | 12 | 1(0.9-1.11) | 9.87E-01 | 0.96 |
| Interleukin-8 levels | IVW | 13 | 0.98(0.89-1.08) | 6.75E-01 | 1.00 |
| Interleukin-8 levels | MR Egger | 13 | 0.94(0.76-1.17) | 6.18E-01 | 0.69 |
| Interleukin-8 levels | WM | 13 | 1(0.87-1.15) | 9.90E-01 | 1.00 |
| Interleukin-8 levels | ML | 13 | 0.98(0.88-1.08) | 6.75E-01 | 0.93 |
| Latency-associated peptide transforming growth factor beta 1 levels | IVW | 16 | 1.04(0.95-1.12) | 4.07E-01 | 0.82 |
| Latency-associated peptide transforming growth factor beta 1 levels | MR Egger | 16 | 1.11(0.96-1.27) | 1.87E-01 | 0.67 |
| Latency-associated peptide transforming growth factor beta 1 levels | WM | 16 | 1.01(0.9-1.14) | 8.68E-01 | 1.00 |
| Latency-associated peptide transforming growth factor beta 1 levels | ML | 16 | 1.04(0.95-1.13) | 3.99E-01 | 0.76 |
| Leukemia inhibitory factor levels | IVW | 5 | 1.13(0.98-1.32) | 1.01E-01 | 0.76 |
| Leukemia inhibitory factor levels | MR Egger | 5 | 1.18(0.78-1.78) | 4.98E-01 | 0.69 |
| Leukemia inhibitory factor levels | WM | 5 | 1.14(0.95-1.37) | 1.62E-01 | 0.86 |
| Leukemia inhibitory factor levels | ML | 5 | 1.14(0.97-1.32) | 1.04E-01 | 0.54 |
| Leukemia inhibitory factor receptor levels | IVW | 12 | 1.04(0.96-1.11) | 3.38E-01 | 0.82 |
| Leukemia inhibitory factor receptor levels | MR Egger | 12 | 1.04(0.91-1.18) | 5.89E-01 | 0.69 |
| Leukemia inhibitory factor receptor levels | WM | 12 | 1.03(0.94-1.12) | 5.52E-01 | 1.00 |
| Leukemia inhibitory factor receptor levels | ML | 12 | 1.04(0.96-1.11) | 3.37E-01 | 0.71 |
| Macrophage colony-stimulating factor 1 levels | IVW | 12 | 1.13(1.04-1.22) | 5.57E-03 | 0.25 |
| Macrophage colony-stimulating factor 1 levels | MR Egger | 12 | 1.13(0.89-1.43) | 3.34E-01 | 0.67 |
| Macrophage colony-stimulating factor 1 levels | WM | 12 | 1.13(1.01-1.26) | 2.63E-02 | 0.85 |
| Macrophage colony-stimulating factor 1 levels | ML | 12 | 1.13(1.04-1.23) | 5.66E-03 | 0.17 |
| Macrophage inflammatory protein 1a levels | IVW | 11 | 1.02(0.95-1.09) | 5.91E-01 | 0.98 |
| Macrophage inflammatory protein 1a levels | MR Egger | 11 | 1.02(0.92-1.13) | 7.12E-01 | 0.70 |
| Macrophage inflammatory protein 1a levels | WM | 11 | 1.03(0.97-1.09) | 3.85E-01 | 0.92 |
| Macrophage inflammatory protein 1a levels | ML | 11 | 1.02(0.97-1.07) | 4.99E-01 | 0.82 |
| Matrix metalloproteinase-1 levels | IVW | 14 | 0.99(0.92-1.06) | 7.51E-01 | 1.00 |
| Matrix metalloproteinase-1 levels | MR Egger | 14 | 0.96(0.84-1.1) | 5.90E-01 | 0.69 |
| Matrix metalloproteinase-1 levels | WM | 14 | 1(0.9-1.1) | 9.39E-01 | 1.00 |
| Matrix metalloproteinase-1 levels | ML | 14 | 0.99(0.92-1.06) | 7.49E-01 | 0.93 |
| Matrix metalloproteinase-10 levels | IVW | 12 | 0.98(0.93-1.03) | 3.60E-01 | 0.82 |
| Matrix metalloproteinase-10 levels | MR Egger | 12 | 0.96(0.9-1.02) | 2.04E-01 | 0.67 |
| Matrix metalloproteinase-10 levels | WM | 12 | 0.97(0.91-1.03) | 2.72E-01 | 0.86 |
| Matrix metalloproteinase-10 levels | ML | 12 | 0.98(0.93-1.03) | 3.57E-01 | 0.71 |
| Monocyte chemoattractant protein 2 levels | IVW | 21 | 1.01(0.98-1.05) | 4.88E-01 | 0.89 |
| Monocyte chemoattractant protein 2 levels | MR Egger | 21 | 1.02(0.98-1.06) | 4.34E-01 | 0.69 |
| Monocyte chemoattractant protein 2 levels | WM | 21 | 1.02(0.98-1.06) | 4.34E-01 | 0.92 |
| Monocyte chemoattractant protein 2 levels | ML | 21 | 1.01(0.98-1.05) | 4.86E-01 | 0.82 |
| Monocyte chemoattractant protein-1 levels | IVW | 15 | 0.99(0.92-1.06) | 7.10E-01 | 1.00 |
| Monocyte chemoattractant protein-1 levels | MR Egger | 15 | 0.94(0.82-1.07) | 3.81E-01 | 0.68 |
| Monocyte chemoattractant protein-1 levels | WM | 15 | 0.96(0.87-1.06) | 4.40E-01 | 0.92 |
| Monocyte chemoattractant protein-1 levels | ML | 15 | 0.99(0.92-1.06) | 7.04E-01 | 0.93 |
| Monocyte chemoattractant protein-3 levels | IVW | 18 | 1.01(0.94-1.09) | 7.16E-01 | 1.00 |
| Monocyte chemoattractant protein-3 levels | MR Egger | 18 | 0.96(0.81-1.14) | 6.77E-01 | 0.69 |
| Monocyte chemoattractant protein-3 levels | WM | 18 | 1.01(0.91-1.11) | 9.03E-01 | 1.00 |
| Monocyte chemoattractant protein-3 levels | ML | 18 | 1.01(0.95-1.09) | 6.73E-01 | 0.93 |
| Monocyte chemoattractant protein-4 levels | IVW | 14 | 0.96(0.91-1.01) | 1.38E-01 | 0.76 |
| Monocyte chemoattractant protein-4 levels | MR Egger | 14 | 0.96(0.85-1.09) | 5.52E-01 | 0.69 |
| Monocyte chemoattractant protein-4 levels | WM | 14 | 0.94(0.88-1.01) | 1.03E-01 | 0.85 |
| Monocyte chemoattractant protein-4 levels | ML | 14 | 0.96(0.91-1.01) | 1.35E-01 | 0.54 |
| Natural killer cell receptor 2B4 levels | IVW | 16 | 0.95(0.89-1.02) | 1.32E-01 | 0.76 |
| Natural killer cell receptor 2B4 levels | MR Egger | 16 | 0.98(0.85-1.13) | 7.98E-01 | 0.73 |
| Natural killer cell receptor 2B4 levels | WM | 16 | 0.98(0.89-1.07) | 5.88E-01 | 1.00 |
| Natural killer cell receptor 2B4 levels | ML | 16 | 0.95(0.89-1.02) | 1.33E-01 | 0.54 |
| Neurotrophin-3 levels | IVW | 12 | 1.09(0.97-1.21) | 1.33E-01 | 0.76 |
| Neurotrophin-3 levels | MR Egger | 12 | 1.09(0.87-1.37) | 4.56E-01 | 0.69 |
| Neurotrophin-3 levels | WM | 12 | 1.09(0.95-1.26) | 2.23E-01 | 0.86 |
| Neurotrophin-3 levels | ML | 12 | 1.09(0.98-1.22) | 1.30E-01 | 0.54 |
| Neurturin levels | IVW | 9 | 1.02(0.9-1.17) | 7.30E-01 | 1.00 |
| Neurturin levels | MR Egger | 9 | 0.98(0.76-1.28) | 9.13E-01 | 0.73 |
| Neurturin levels | WM | 9 | 0.98(0.84-1.13) | 7.41E-01 | 1.00 |
| Neurturin levels | ML | 9 | 1.03(0.92-1.14) | 6.47E-01 | 0.92 |
| Oncostatin-M levels | IVW | 11 | 1.08(0.91-1.29) | 3.96E-01 | 0.82 |
| Oncostatin-M levels | MR Egger | 11 | 1.54(0.95-2.48) | 1.13E-01 | 0.65 |
| Oncostatin-M levels | WM | 11 | 1.13(0.98-1.3) | 1.04E-01 | 0.85 |
| Oncostatin-M levels | ML | 11 | 1.09(0.99-1.2) | 8.93E-02 | 0.54 |
| Osteoprotegerin levels | IVW | 14 | 1.07(0.99-1.17) | 8.38E-02 | 0.76 |
| Osteoprotegerin levels | MR Egger | 14 | 1.12(0.94-1.33) | 2.34E-01 | 0.67 |
| Osteoprotegerin levels | WM | 14 | 1.07(0.96-1.2) | 1.99E-01 | 0.86 |
| Osteoprotegerin levels | ML | 14 | 1.08(0.99-1.17) | 6.77E-02 | 0.54 |
| Programmed cell death 1 ligand 1 levels | IVW | 11 | 0.99(0.89-1.1) | 8.45E-01 | 1.00 |
| Programmed cell death 1 ligand 1 levels | MR Egger | 11 | 1.26(0.98-1.62) | 1.05E-01 | 0.65 |
| Programmed cell death 1 ligand 1 levels | WM | 11 | 1.03(0.89-1.18) | 7.09E-01 | 1.00 |
| Programmed cell death 1 ligand 1 levels | ML | 11 | 0.99(0.89-1.09) | 8.28E-01 | 0.94 |
| Protein S100-A12 levels | IVW | 14 | 1(0.91-1.11) | 9.21E-01 | 1.00 |
| Protein S100-A12 levels | MR Egger | 14 | 0.99(0.81-1.21) | 9.16E-01 | 0.73 |
| Protein S100-A12 levels | WM | 14 | 0.93(0.83-1.05) | 2.30E-01 | 0.86 |
| Protein S100-A12 levels | ML | 14 | 1.01(0.93-1.09) | 9.02E-01 | 0.95 |
| Signaling lymphocytic activation molecule levels | IVW | 22 | 1.01(0.94-1.08) | 7.98E-01 | 1.00 |
| Signaling lymphocytic activation molecule levels | MR Egger | 22 | 0.92(0.79-1.07) | 2.95E-01 | 0.67 |
| Signaling lymphocytic activation molecule levels | WM | 22 | 0.98(0.89-1.08) | 6.42E-01 | 1.00 |
| Signaling lymphocytic activation molecule levels | ML | 22 | 1.01(0.95-1.08) | 7.69E-01 | 0.93 |
| SIR2-like protein 2 levels | IVW | 8 | 0.98(0.86-1.13) | 8.24E-01 | 1.00 |
| SIR2-like protein 2 levels | MR Egger | 8 | 0.92(0.56-1.54) | 7.74E-01 | 0.73 |
| SIR2-like protein 2 levels | WM | 8 | 1.01(0.86-1.19) | 8.93E-01 | 1.00 |
| SIR2-like protein 2 levels | ML | 8 | 0.98(0.86-1.13) | 8.23E-01 | 0.94 |
| STAM binding protein levels | IVW | 10 | 1.08(0.96-1.22) | 1.93E-01 | 0.76 |
| STAM binding protein levels | MR Egger | 10 | 1.26(0.83-1.9) | 3.05E-01 | 0.67 |
| STAM binding protein levels | WM | 10 | 1.1(0.94-1.28) | 2.51E-01 | 0.86 |
| STAM binding protein levels | ML | 10 | 1.09(0.96-1.23) | 1.86E-01 | 0.56 |
| Stem cell factor levels | IVW | 27 | 1(0.93-1.07) | 9.83E-01 | 1.00 |
| Stem cell factor levels | MR Egger | 27 | 1.03(0.9-1.19) | 6.52E-01 | 0.69 |
| Stem cell factor levels | WM | 27 | 1.05(0.97-1.14) | 2.45E-01 | 0.86 |
| Stem cell factor levels | ML | 27 | 1(0.95-1.05) | 9.76E-01 | 0.96 |
| Sulfotransferase 1A1 levels | IVW | 17 | 1.04(0.97-1.11) | 2.65E-01 | 0.77 |
| Sulfotransferase 1A1 levels | MR Egger | 17 | 0.99(0.85-1.14) | 8.54E-01 | 0.73 |
| Sulfotransferase 1A1 levels | WM | 17 | 1.04(0.96-1.13) | 3.68E-01 | 0.92 |
| Sulfotransferase 1A1 levels | ML | 17 | 1.04(0.98-1.1) | 2.33E-01 | 0.56 |
| T-cell surface glycoprotein CD5 levels | IVW | 17 | 1.05(0.97-1.14) | 2.44E-01 | 0.77 |
| T-cell surface glycoprotein CD5 levels | MR Egger | 17 | 1.05(0.85-1.31) | 6.59E-01 | 0.69 |
| T-cell surface glycoprotein CD5 levels | WM | 17 | 1.06(0.95-1.18) | 3.08E-01 | 0.90 |
| T-cell surface glycoprotein CD5 levels | ML | 17 | 1.05(0.97-1.14) | 2.39E-01 | 0.56 |
| T-cell surface glycoprotein CD6 isoform levels | IVW | 13 | 1.04(0.99-1.08) | 9.29E-02 | 0.76 |
| T-cell surface glycoprotein CD6 isoform levels | MR Egger | 13 | 1.03(0.96-1.1) | 4.55E-01 | 0.69 |
| T-cell surface glycoprotein CD6 isoform levels | WM | 13 | 1.03(0.98-1.08) | 2.75E-01 | 0.86 |
| T-cell surface glycoprotein CD6 isoform levels | ML | 13 | 1.04(0.99-1.08) | 9.13E-02 | 0.54 |
| Thymic stromal lymphopoietin levels | IVW | 7 | 0.96(0.84-1.09) | 5.30E-01 | 0.94 |
| Thymic stromal lymphopoietin levels | MR Egger | 7 | 0.82(0.63-1.08) | 2.23E-01 | 0.67 |
| Thymic stromal lymphopoietin levels | WM | 7 | 0.97(0.82-1.14) | 7.26E-01 | 1.00 |
| Thymic stromal lymphopoietin levels | ML | 7 | 0.96(0.84-1.09) | 5.07E-01 | 0.82 |
| TNF-beta levels | IVW | 20 | 1.01(0.97-1.06) | 4.87E-01 | 0.89 |
| TNF-beta levels | MR Egger | 20 | 0.98(0.92-1.04) | 5.47E-01 | 0.69 |
| TNF-beta levels | WM | 20 | 1.01(0.96-1.07) | 6.06E-01 | 1.00 |
| TNF-beta levels | ML | 20 | 1.01(0.97-1.06) | 4.86E-01 | 0.82 |
| TNF-related activation-induced cytokine levels | IVW | 20 | 1(0.93-1.07) | 9.54E-01 | 1.00 |
| TNF-related activation-induced cytokine levels | MR Egger | 20 | 0.93(0.81-1.06) | 2.93E-01 | 0.67 |
| TNF-related activation-induced cytokine levels | WM | 20 | 0.95(0.86-1.05) | 3.18E-01 | 0.90 |
| TNF-related activation-induced cytokine levels | ML | 20 | 1(0.94-1.06) | 9.45E-01 | 0.95 |
| TNF-related apoptosis-inducing ligand levels | IVW | 20 | 1.01(0.95-1.06) | 8.11E-01 | 1.00 |
| TNF-related apoptosis-inducing ligand levels | MR Egger | 20 | 1.04(0.96-1.13) | 3.65E-01 | 0.68 |
| TNF-related apoptosis-inducing ligand levels | WM | 20 | 1.04(0.97-1.12) | 2.36E-01 | 0.86 |
| TNF-related apoptosis-inducing ligand levels | ML | 20 | 1.01(0.96-1.06) | 7.88E-01 | 0.94 |
| Transforming growth factor-alpha levels | IVW | 7 | 0.99(0.76-1.28) | 9.12E-01 | 1.00 |
| Transforming growth factor-alpha levels | MR Egger | 7 | 0.75(0.3-1.83) | 5.53E-01 | 0.69 |
| Transforming growth factor-alpha levels | WM | 7 | 0.98(0.79-1.21) | 8.30E-01 | 1.00 |
| Transforming growth factor-alpha levels | ML | 7 | 0.98(0.86-1.13) | 8.04E-01 | 0.94 |
| Tumor necrosis factor levels | IVW | 12 | 0.94(0.85-1.05) | 2.74E-01 | 0.77 |
| Tumor necrosis factor levels | MR Egger | 12 | 1.04(0.84-1.29) | 7.48E-01 | 0.72 |
| Tumor necrosis factor levels | WM | 12 | 1.01(0.88-1.15) | 9.22E-01 | 1.00 |
| Tumor necrosis factor levels | ML | 12 | 0.94(0.85-1.04) | 2.43E-01 | 0.56 |
| Tumor necrosis factor ligand superfamily member 12 levels | IVW | 17 | 1.07(0.97-1.18) | 1.79E-01 | 0.76 |
| Tumor necrosis factor ligand superfamily member 12 levels | MR Egger | 17 | 0.93(0.76-1.13) | 4.79E-01 | 0.69 |
| Tumor necrosis factor ligand superfamily member 12 levels | WM | 17 | 1(0.9-1.11) | 9.82E-01 | 1.00 |
| Tumor necrosis factor ligand superfamily member 12 levels | ML | 17 | 1.07(1-1.15) | 5.77E-02 | 0.54 |
| Tumor necrosis factor ligand superfamily member 14 levels | IVW | 18 | 0.97(0.9-1.04) | 3.95E-01 | 0.82 |
| Tumor necrosis factor ligand superfamily member 14 levels | MR Egger | 18 | 0.99(0.88-1.12) | 9.12E-01 | 0.73 |
| Tumor necrosis factor ligand superfamily member 14 levels | WM | 18 | 1.02(0.93-1.11) | 6.56E-01 | 1.00 |
| Tumor necrosis factor ligand superfamily member 14 levels | ML | 18 | 0.97(0.91-1.03) | 2.90E-01 | 0.62 |
| Tumor necrosis factor receptor superfamily member 9 levels | IVW | 17 | 1(0.92-1.09) | 9.08E-01 | 1.00 |
| Tumor necrosis factor receptor superfamily member 9 levels | MR Egger | 17 | 0.85(0.7-1.03) | 1.14E-01 | 0.65 |
| Tumor necrosis factor receptor superfamily member 9 levels | WM | 17 | 0.96(0.86-1.07) | 4.26E-01 | 0.92 |
| Tumor necrosis factor receptor superfamily member 9 levels | ML | 17 | 1.01(0.93-1.08) | 8.92E-01 | 0.95 |
| Urokinase-type plasminogen activator levels | IVW | 15 | 0.95(0.89-1.02) | 1.45E-01 | 0.76 |
| Urokinase-type plasminogen activator levels | MR Egger | 15 | 0.92(0.78-1.07) | 2.87E-01 | 0.67 |
| Urokinase-type plasminogen activator levels | WM | 15 | 0.94(0.85-1.03) | 2.01E-01 | 0.86 |
| Urokinase-type plasminogen activator levels | ML | 15 | 0.95(0.89-1.02) | 1.41E-01 | 0.54 |
| Vascular endothelial growth factor A levels | IVW | 15 | 1.01(0.96-1.06) | 7.82E-01 | 1.00 |
| Vascular endothelial growth factor A levels | MR Egger | 15 | 0.99(0.92-1.07) | 8.95E-01 | 0.73 |
| Vascular endothelial growth factor A levels | WM | 15 | 0.99(0.94-1.04) | 7.19E-01 | 1.00 |
| Vascular endothelial growth factor A levels | ML | 15 | 1.01(0.96-1.05) | 7.58E-01 | 0.93 |

MR, Mendelian randomization; BCC, basal cell carcinoma; SNP, single nucleotide polymorphism; SE, standard error; OR, odds ratio; CI, confidence interval; IVW, Inverse variance weighted; ML, Maximum likelihood; WM, weighted median.

| **Table S3 The heterogeneity of Circulating Inflammatory Proteins instrumental variables.** | | | |
| --- | --- | --- | --- |
| **exposure** | **Cochran's Q** | **df** | **P-value** |
| Adenosine Deaminase levels | 11.25 | 8.00 | 1.88E-01 |
| Artemin levels | 13.32 | 11.00 | 2.73E-01 |
| Axin-1 levels | 2.25 | 5.00 | 8.14E-01 |
| beta-nerve growth factor levels | 28.71 | 15.00 | 1.75E-02 |
| Caspase 8 levels | 8.90 | 5.00 | 1.13E-01 |
| C-C motif chemokine 19 levels | 2.77 | 9.00 | 9.73E-01 |
| C-C motif chemokine 20 levels | 16.59 | 15.00 | 3.44E-01 |
| C-C motif chemokine 23 levels | 26.20 | 18.00 | 9.52E-02 |
| C-C motif chemokine 25 levels | 14.35 | 20.00 | 8.12E-01 |
| C-C motif chemokine 28 levels | 15.93 | 13.00 | 2.53E-01 |
| C-C motif chemokine 4 levels | 6.15 | 13.00 | 9.41E-01 |
| CD40L receptor levels | 11.48 | 9.00 | 2.44E-01 |
| CUB domain-containing protein 1 levels | 20.22 | 14.00 | 1.23E-01 |
| C-X-C motif chemokine 1 levels | 12.25 | 7.00 | 9.25E-02 |
| C-X-C motif chemokine 10 levels | 35.82 | 18.00 | 7.43E-03 |
| C-X-C motif chemokine 11 levels | 31.67 | 18.00 | 2.41E-02 |
| C-X-C motif chemokine 5 levels | 30.21 | 10.00 | 7.90E-04 |
| C-X-C motif chemokine 6 levels | 16.31 | 7.00 | 2.24E-02 |
| C-X-C motif chemokine 9 levels | 103.78 | 17.00 | 1.77E-14 |
| Cystatin D levels | 24.70 | 25.00 | 4.79E-01 |
| Delta and Notch-like epidermal growth factor-related receptor levels | 9.15 | 9.00 | 4.24E-01 |
| Eotaxin levels | 44.39 | 14.00 | 5.13E-05 |
| Eukaryotic translation initiation factor 4E-binding protein 1 levels | 4.30 | 7.00 | 7.44E-01 |
| Fibroblast growth factor 19 levels | 20.60 | 17.00 | 2.45E-01 |
| Fibroblast growth factor 21 levels | 10.79 | 10.00 | 3.74E-01 |
| Fibroblast growth factor 23 levels | 6.11 | 8.00 | 6.35E-01 |
| Fibroblast growth factor 5 levels | 15.38 | 17.00 | 5.68E-01 |
| Fms-related tyrosine kinase 3 ligand levels | 73.50 | 19.00 | 2.38E-08 |
| Fractalkine levels | 12.74 | 17.00 | 7.54E-01 |
| Glial cell line-derived neurotrophic factor levels | 5.32 | 9.00 | 8.06E-01 |
| Hepatocyte growth factor levels | 6.85 | 9.00 | 6.53E-01 |
| Interferon gamma levels | 3.34 | 3.00 | 3.42E-01 |
| Interleukin-10 levels | 12.49 | 11.00 | 3.28E-01 |
| Interleukin-10 receptor subunit alpha levels | 11.18 | 6.00 | 8.29E-02 |
| Interleukin-10 receptor subunit beta levels | 20.79 | 13.00 | 7.73E-02 |
| Interleukin-12 subunit beta levels | 33.43 | 19.00 | 2.14E-02 |
| Interleukin-13 levels | 5.18 | 9.00 | 8.18E-01 |
| Interleukin-15 receptor subunit alpha levels | 52.73 | 7.00 | 4.19E-09 |
| Interleukin-17A levels | 16.33 | 10.00 | 9.07E-02 |
| Interleukin-17C levels | 12.26 | 12.00 | 4.25E-01 |
| Interleukin-18 levels | 12.45 | 11.00 | 3.31E-01 |
| interleukin-18 receptor 1 levels | 28.50 | 17.00 | 3.94E-02 |
| Interleukin-1-alpha levels | 18.58 | 8.00 | 1.72E-02 |
| Interleukin-2 levels | 17.35 | 12.00 | 1.37E-01 |
| Interleukin-2 receptor subunit beta levels | 11.52 | 8.00 | 1.74E-01 |
| Interleukin-20 levels | 9.29 | 9.00 | 4.11E-01 |
| Interleukin-20 receptor subunit alpha levels | 1.92 | 5.00 | 8.60E-01 |
| Interleukin-22 receptor subunit alpha-1 levels | 14.01 | 9.00 | 1.22E-01 |
| Interleukin-24 levels | 6.65 | 7.00 | 4.66E-01 |
| Interleukin-33 levels | 7.18 | 6.00 | 3.04E-01 |
| Interleukin-4 levels | 11.53 | 8.00 | 1.74E-01 |
| Interleukin-5 levels | 9.17 | 8.00 | 3.28E-01 |
| Interleukin-6 levels | 1.90 | 5.00 | 8.63E-01 |
| Interleukin-7 levels | 22.26 | 11.00 | 2.24E-02 |
| Interleukin-8 levels | 11.30 | 12.00 | 5.04E-01 |
| Latency-associated peptide transforming growth factor beta 1 levels | 15.53 | 15.00 | 4.14E-01 |
| Leukemia inhibitory factor levels | 0.70 | 4.00 | 9.51E-01 |
| Leukemia inhibitory factor receptor levels | 3.71 | 11.00 | 9.78E-01 |
| Macrophage colony-stimulating factor 1 levels | 8.08 | 11.00 | 7.06E-01 |
| Macrophage inflammatory protein 1a levels | 15.38 | 10.00 | 1.19E-01 |
| Matrix metalloproteinase-1 levels | 10.37 | 13.00 | 6.64E-01 |
| Matrix metalloproteinase-10 levels | 7.44 | 11.00 | 7.62E-01 |
| Monocyte chemoattractant protein 2 levels | 16.71 | 20.00 | 6.72E-01 |
| Monocyte chemoattractant protein-1 levels | 13.92 | 14.00 | 4.56E-01 |
| Monocyte chemoattractant protein-3 levels | 21.56 | 17.00 | 2.02E-01 |
| Monocyte chemoattractant protein-4 levels | 11.68 | 13.00 | 5.54E-01 |
| Natural killer cell receptor 2B4 levels | 7.34 | 15.00 | 9.47E-01 |
| Neurotrophin-3 levels | 5.72 | 11.00 | 8.91E-01 |
| Neurturin levels | 13.04 | 8.00 | 1.11E-01 |
| Oncostatin-M levels | 36.69 | 10.00 | 6.41E-05 |
| Osteoprotegerin levels | 14.02 | 13.00 | 3.73E-01 |
| Programmed cell death 1 ligand 1 levels | 11.96 | 10.00 | 2.88E-01 |
| Protein S100-A12 levels | 19.39 | 13.00 | 1.12E-01 |
| Signaling lymphocytic activation molecule levels | 26.97 | 21.00 | 1.72E-01 |
| SIR2-like protein 2 levels | 2.01 | 7.00 | 9.59E-01 |
| STAM binding protein levels | 7.22 | 9.00 | 6.15E-01 |
| Stem cell factor levels | 47.21 | 26.00 | 6.66E-03 |
| Sulfotransferase 1A1 levels | 18.24 | 16.00 | 3.10E-01 |
| T-cell surface glycoprotein CD5 levels | 6.71 | 16.00 | 9.78E-01 |
| T-cell surface glycoprotein CD6 isoform levels | 10.04 | 12.00 | 6.13E-01 |
| Thymic stromal lymphopoietin levels | 6.49 | 6.00 | 3.71E-01 |
| TNF-beta levels | 13.52 | 19.00 | 8.11E-01 |
| TNF-related activation-induced cytokine levels | 28.04 | 19.00 | 8.27E-02 |
| TNF-related apoptosis-inducing ligand levels | 24.09 | 19.00 | 1.93E-01 |
| Transforming growth factor-alpha levels | 25.98 | 6.00 | 2.25E-04 |
| Tumor necrosis factor levels | 13.36 | 11.00 | 2.70E-01 |
| Tumor necrosis factor ligand superfamily member 12 levels | 30.47 | 16.00 | 1.57E-02 |
| Tumor necrosis factor ligand superfamily member 14 levels | 25.57 | 17.00 | 8.27E-02 |
| Tumor necrosis factor receptor superfamily member 9 levels | 20.66 | 16.00 | 1.92E-01 |
| Urokinase-type plasminogen activator levels | 11.58 | 14.00 | 6.40E-01 |
| Vascular endothelial growth factor A levels | 17.27 | 14.00 | 2.42E-01 |

Df, degree of freedom.

| **Table S4 Directional horizontal pleiotropy assessed by intercept term in MR Egger regression of the association between Circulating Inflammatory Proteins and BCC.** | | | |
| --- | --- | --- | --- |
| **exposure** | **Egger_intercept** | **SE** | **P-value** |
| Adenosine Deaminase levels | 0.01 | 0.01 | 3.34E-01 |
| Artemin levels | -0.02 | 0.01 | 2.60E-01 |
| Axin-1 levels | 0.00 | 0.02 | 8.57E-01 |
| beta-nerve growth factor levels | -0.01 | 0.02 | 5.29E-01 |
| Caspase 8 levels | 0.04 | 0.02 | 1.37E-01 |
| C-C motif chemokine 19 levels | 0.00 | 0.01 | 8.51E-01 |
| C-C motif chemokine 20 levels | 0.01 | 0.01 | 2.57E-01 |
| C-C motif chemokine 23 levels | 0.00 | 0.01 | 9.10E-01 |
| C-C motif chemokine 25 levels | -0.01 | 0.00 | 1.01E-01 |
| C-C motif chemokine 28 levels | -0.01 | 0.01 | 5.28E-01 |
| C-C motif chemokine 4 levels | 0.01 | 0.01 | 1.92E-01 |
| CD40L receptor levels | 0.00 | 0.01 | 5.51E-01 |
| CUB domain-containing protein 1 levels | 0.02 | 0.01 | 9.42E-02 |
| C-X-C motif chemokine 1 levels | -0.01 | 0.01 | 4.07E-01 |
| C-X-C motif chemokine 10 levels | -0.01 | 0.01 | 5.02E-01 |
| C-X-C motif chemokine 11 levels | 0.00 | 0.01 | 8.59E-01 |
| C-X-C motif chemokine 5 levels | 0.00 | 0.01 | 9.10E-01 |
| C-X-C motif chemokine 6 levels | -0.02 | 0.02 | 3.85E-01 |
| C-X-C motif chemokine 9 levels | -0.01 | 0.02 | 6.44E-01 |
| Cystatin D levels | 0.00 | 0.00 | 1.98E-01 |
| Delta and Notch-like epidermal growth factor-related receptor levels | -0.02 | 0.01 | 2.11E-01 |
| Eotaxin levels | 0.02 | 0.02 | 3.35E-01 |
| Eukaryotic translation initiation factor 4E-binding protein 1 levels | 0.00 | 0.01 | 9.50E-01 |
| Fibroblast growth factor 19 levels | -0.01 | 0.01 | 4.04E-01 |
| Fibroblast growth factor 21 levels | -0.01 | 0.01 | 6.25E-01 |
| Fibroblast growth factor 23 levels | -0.02 | 0.02 | 2.96E-01 |
| Fibroblast growth factor 5 levels | 0.00 | 0.01 | 4.30E-01 |
| Fms-related tyrosine kinase 3 ligand levels | -0.01 | 0.01 | 1.85E-01 |
| Fractalkine levels | -0.02 | 0.01 | 9.30E-02 |
| Glial cell line-derived neurotrophic factor levels | -0.02 | 0.01 | 1.66E-01 |
| Hepatocyte growth factor levels | 0.00 | 0.01 | 7.73E-01 |
| Interferon gamma levels | 0.02 | 0.02 | 3.57E-01 |
| Interleukin-10 levels | -0.02 | 0.01 | 1.04E-01 |
| Interleukin-10 receptor subunit alpha levels | 0.03 | 0.02 | 1.10E-01 |
| Interleukin-10 receptor subunit beta levels | -0.01 | 0.01 | 3.95E-01 |
| Interleukin-12 subunit beta levels | -0.01 | 0.01 | 2.34E-01 |
| Interleukin-13 levels | -0.01 | 0.01 | 3.09E-01 |
| Interleukin-15 receptor subunit alpha levels | -0.03 | 0.03 | 3.06E-01 |
| Interleukin-17A levels | -0.04 | 0.01 | 1.50E-02 |
| Interleukin-17C levels | -0.01 | 0.01 | 5.31E-01 |
| Interleukin-18 levels | 0.03 | 0.01 | 4.99E-02 |
| interleukin-18 receptor 1 levels | 0.00 | 0.01 | 7.81E-01 |
| Interleukin-1-alpha levels | -0.03 | 0.01 | 5.50E-02 |
| Interleukin-2 levels | 0.01 | 0.02 | 5.80E-01 |
| Interleukin-2 receptor subunit beta levels | 0.00 | 0.02 | 9.12E-01 |
| Interleukin-20 levels | -0.02 | 0.01 | 1.18E-01 |
| Interleukin-20 receptor subunit alpha levels | -0.01 | 0.02 | 5.98E-01 |
| Interleukin-22 receptor subunit alpha-1 levels | 0.01 | 0.01 | 3.53E-01 |
| Interleukin-24 levels | 0.00 | 0.01 | 9.58E-01 |
| Interleukin-33 levels | -0.04 | 0.02 | 1.40E-01 |
| Interleukin-4 levels | -0.04 | 0.01 | 1.72E-02 |
| Interleukin-5 levels | 0.00 | 0.02 | 9.83E-01 |
| Interleukin-6 levels | 0.00 | 0.01 | 9.87E-01 |
| Interleukin-7 levels | -0.03 | 0.01 | 3.91E-02 |
| Interleukin-8 levels | 0.00 | 0.01 | 7.24E-01 |
| Latency-associated peptide transforming growth factor beta 1 levels | -0.01 | 0.01 | 2.87E-01 |
| Leukemia inhibitory factor levels | 0.00 | 0.02 | 8.69E-01 |
| Leukemia inhibitory factor receptor levels | 0.00 | 0.01 | 9.83E-01 |
| Macrophage colony-stimulating factor 1 levels | 0.00 | 0.01 | 9.72E-01 |
| Macrophage inflammatory protein 1a levels | 0.00 | 0.01 | 9.55E-01 |
| Matrix metalloproteinase-1 levels | 0.00 | 0.01 | 6.58E-01 |
| Matrix metalloproteinase-10 levels | 0.01 | 0.01 | 3.30E-01 |
| Monocyte chemoattractant protein 2 levels | 0.00 | 0.01 | 6.90E-01 |
| Monocyte chemoattractant protein-1 levels | 0.01 | 0.01 | 4.18E-01 |
| Monocyte chemoattractant protein-3 levels | 0.01 | 0.01 | 5.24E-01 |
| Monocyte chemoattractant protein-4 levels | 0.00 | 0.01 | 9.61E-01 |
| Natural killer cell receptor 2B4 levels | 0.00 | 0.01 | 6.09E-01 |
| Neurotrophin-3 levels | 0.00 | 0.01 | 9.50E-01 |
| Neurturin levels | 0.01 | 0.02 | 7.44E-01 |
| Oncostatin-M levels | -0.03 | 0.02 | 1.59E-01 |
| Osteoprotegerin levels | 0.00 | 0.01 | 6.26E-01 |
| Programmed cell death 1 ligand 1 levels | -0.02 | 0.01 | 7.07E-02 |
| Protein S100-A12 levels | 0.00 | 0.01 | 8.62E-01 |
| Signaling lymphocytic activation molecule levels | 0.01 | 0.01 | 1.95E-01 |
| SIR2-like protein 2 levels | 0.01 | 0.03 | 8.11E-01 |
| STAM binding protein levels | -0.02 | 0.03 | 4.75E-01 |
| Stem cell factor levels | 0.00 | 0.01 | 6.10E-01 |
| Sulfotransferase 1A1 levels | 0.01 | 0.01 | 4.64E-01 |
| T-cell surface glycoprotein CD5 levels | 0.00 | 0.01 | 9.93E-01 |
| T-cell surface glycoprotein CD6 isoform levels | 0.00 | 0.01 | 7.74E-01 |
| Thymic stromal lymphopoietin levels | 0.02 | 0.02 | 2.73E-01 |
| TNF-beta levels | 0.01 | 0.01 | 1.77E-01 |
| TNF-related activation-induced cytokine levels | 0.01 | 0.01 | 2.36E-01 |
| TNF-related apoptosis-inducing ligand levels | -0.01 | 0.01 | 3.29E-01 |
| Transforming growth factor-alpha levels | 0.02 | 0.04 | 5.54E-01 |
| Tumor necrosis factor levels | -0.01 | 0.01 | 3.40E-01 |
| Tumor necrosis factor ligand superfamily member 12 levels | 0.02 | 0.01 | 1.44E-01 |
| Tumor necrosis factor ligand superfamily member 14 levels | 0.00 | 0.01 | 6.16E-01 |
| Tumor necrosis factor receptor superfamily member 9 levels | 0.02 | 0.01 | 7.91E-02 |
| Urokinase-type plasminogen activator levels | 0.00 | 0.01 | 6.09E-01 |
| Vascular endothelial growth factor A levels | 0.00 | 0.01 | 6.85E-01 |

MR, Mendelian randomization; BCC, basal cell carcinoma; SE, standard error.

| **Table S5 MR-PRESSO analysis for the association between Circulating Inflammatory Proteins and BCC.** | | | | | | | | |
| --- | --- | --- | --- | --- | --- | --- | --- | --- |
| **exposure** | **MR Analysis** | **Causal Estimate** | **Sd** | **T-stat** | **P-value** | **Rossbs** | **Global test P-value** | **Remove SNP** |
| Adenosine Deaminase levels | MRPRESSO | 0.00 | 0.03 | 0.00 | 1.00 | 21.472959 | 0.144 | 0 |
| Artemin levels | MRPRESSO | -0.09 | 0.04 | -2.00 | 0.06 | 18.67219265 | 0.39 | 0 |
| Axin-1 levels | MRPRESSO | -0.09 | 0.05 | -1.98 | 0.11 | 3.177033211 | 0.836 | 0 |
| beta-nerve growth factor levels | MRPRESSO | -0.03 | 0.06 | -0.44 | 0.66 | 32.5031395 | 0.057 | 0 |
| Caspase 8 levels | MRPRESSO | 0.01 | 0.05 | 0.13 | 0.90 | 11.69755569 | 0.5 | 0 |
| C-C motif chemokine 19 levels | MRPRESSO | -0.12 | 0.06 | -1.94 | 0.07 | 81.2249231 | <0.001 | 1 |
| C-C motif chemokine 19 levels | Outlier-corrected | -0.07 | 0.04 | -2.03 | 0.06 |  |  |  |
| C-C motif chemokine 20 levels | MRPRESSO | 0.00 | 0.04 | 0.10 | 0.92 | 18.31330847 | 0.567 | 0 |
| C-C motif chemokine 23 levels | MRPRESSO | -0.03 | 0.03 | -1.05 | 0.30 | 30.58443339 | 0.223 | 0 |
| C-C motif chemokine 25 levels | MRPRESSO | 0.03 | 0.01 | 2.08 | 0.05 | 22.63848557 | 0.632 | 0 |
| C-C motif chemokine 28 levels | MRPRESSO | -0.10 | 0.05 | -2.17 | 0.04 | 22.90336899 | 0.244 | 0 |
| C-C motif chemokine 4 levels | MRPRESSO | -0.07 | 0.01 | -5.14 | 0.00 | 7.579007033 | 0.978 | 0 |
| CD40L receptor levels | MRPRESSO | -0.01 | 0.03 | -0.34 | 0.74 | 18.87005989 | 0.371 | 0 |
| CUB domain-containing protein 1 levels | MRPRESSO | 0.00 | 0.03 | 0.04 | 0.97 | 28.5722326 | 0.181 | 0 |
| C-X-C motif chemokine 1 levels | MRPRESSO | 0.02 | 0.04 | 0.52 | 0.62 | 26.40100652 | 0.285 | 0 |
| C-X-C motif chemokine 10 levels | MRPRESSO | -0.06 | 0.05 | -1.23 | 0.23 | 41.53290578 | 0.01 | 2 |
| C-X-C motif chemokine 10 levels | Outlier-corrected | -0.04 | 0.03 | -1.20 | 0.25 |  |  |  |
| C-X-C motif chemokine 11 levels | MRPRESSO | -0.02 | 0.04 | -0.44 | 0.66 | 41.52509946 | 0.019 | 1 |
| C-X-C motif chemokine 11 levels | Outlier-corrected | 0.03 | 0.04 | 0.74 | 0.47 |  |  |  |
| C-X-C motif chemokine 5 levels | MRPRESSO | 0.01 | 0.04 | 0.25 | 0.80 | 35.49741759 | 0.032 | 1 |
| C-X-C motif chemokine 6 levels | MRPRESSO | -0.03 | 0.04 | -0.72 | 0.49 | 22.96832677 | 0.224 | 0 |
| C-X-C motif chemokine 9 levels | MRPRESSO | -0.07 | 0.09 | -0.83 | 0.42 | 118.4047202 | <0.001 | 3 |
| C-X-C motif chemokine 9 levels | Outlier-corrected | 0.00 | 0.05 | 0.10 | 0.92 |  |  |  |
| Cystatin D levels | MRPRESSO | 0.00 | 0.02 | 0.14 | 0.89 | 32.75987649 | 0.345 | 0 |
| Delta and Notch-like epidermal growth factor-related receptor levels | MRPRESSO | 0.05 | 0.04 | 1.24 | 0.24 | 21.2908563 | 0.182 | 0 |
| Eotaxin levels | MRPRESSO | -0.01 | 0.06 | -0.13 | 0.90 | 51.23871595 | <0.001 | 2 |
| Eotaxin levels | Outlier-corrected | -0.07 | 0.03 | -1.93 | 0.07 |  |  |  |
| Eukaryotic translation initiation factor 4E-binding protein 1 levels | MRPRESSO | 0.05 | 0.04 | 1.31 | 0.23 | 6.0261937 | 0.785 | 0 |
| Fibroblast growth factor 19 levels | MRPRESSO | 0.05 | 0.04 | 1.28 | 0.22 | 26.38141962 | 0.204 | 0 |
| Fibroblast growth factor 21 levels | MRPRESSO | -0.02 | 0.05 | -0.35 | 0.73 | 12.43689993 | 0.414 | 0 |
| Fibroblast growth factor 23 levels | MRPRESSO | -0.03 | 0.05 | -0.60 | 0.56 | 11.0759712 | 0.543 | 0 |
| Fibroblast growth factor 5 levels | MRPRESSO | 0.04 | 0.02 | 2.11 | 0.05 | 15.99221702 | 0.812 | 0 |
| Fms-related tyrosine kinase 3 ligand levels | MRPRESSO | -0.10 | 0.05 | -2.07 | 0.05 | 86.36729711 | <0.001 | 2 |
| Fms-related tyrosine kinase 3 ligand levels | Outlier-corrected | -0.06 | 0.03 | -1.64 | 0.11 |  |  |  |
| Fractalkine levels | MRPRESSO | 0.02 | 0.03 | 0.61 | 0.55 | 27.75631251 | 0.277 | 0 |
| Glial cell line-derived neurotrophic factor levels | MRPRESSO | -0.03 | 0.03 | -0.93 | 0.37 | 13.30257436 | 0.521 | 0 |
| Hepatocyte growth factor levels | MRPRESSO | 0.02 | 0.05 | 0.46 | 0.66 | 9.940831101 | 0.705 | 0 |
| Interferon gamma levels | MRPRESSO | -0.02 | 0.08 | -0.26 | 0.81 | 7.041946698 | 0.389 | 0 |
| Interleukin-10 levels | MRPRESSO | -0.04 | 0.05 | -0.88 | 0.40 | 14.63244619 | 0.349 | 0 |
| Interleukin-10 receptor subunit alpha levels | MRPRESSO | 0.00 | 0.08 | -0.01 | 0.99 | 14.64648131 | 0.131 | 0 |
| Interleukin-10 receptor subunit beta levels | MRPRESSO | -0.04 | 0.03 | -1.24 | 0.24 | 21.73353464 | 0.312 | 0 |
| Interleukin-12 subunit beta levels | MRPRESSO | 0.01 | 0.03 | 0.56 | 0.58 | 55.2582392 | 0.058 | 0 |
| Interleukin-13 levels | MRPRESSO | -0.07 | 0.04 | -1.84 | 0.10 | 6.311367069 | 0.868 | 0 |
| Interleukin-15 receptor subunit alpha levels | MRPRESSO | 0.00 | 0.06 | 0.03 | 0.97 | 57.14770444 | <0.001 | 1 |
| Interleukin-15 receptor subunit alpha levels | Outlier-corrected | 0.03 | 0.03 | 0.89 | 0.40 |  |  |  |
| Interleukin-17A levels | MRPRESSO | -0.01 | 0.06 | -0.09 | 0.93 | 19.49451825 | 0.159 | 0 |
| Interleukin-17C levels | MRPRESSO | 0.01 | 0.04 | 0.31 | 0.76 | 26.19692286 | 0.14 | 0 |
| Interleukin-18 levels | MRPRESSO | -0.03 | 0.03 | -0.99 | 0.34 | 18.38595357 | 0.45 | 0 |
| interleukin-18 receptor 1 levels | MRPRESSO | -0.01 | 0.03 | -0.44 | 0.66 | 34.02962254 | 0.098 | 0 |
| Interleukin-1-alpha levels | MRPRESSO | 0.08 | 0.07 | 1.25 | 0.24 | 32.27073359 | 0.012 | 1 |
| Interleukin-1-alpha levels | Outlier-corrected | -0.02 | 0.06 | -0.34 | 0.74 |  |  |  |
| Interleukin-2 levels | MRPRESSO | -0.09 | 0.05 | -1.63 | 0.12 | 22.77533433 | 0.15 | 0 |
| Interleukin-2 receptor subunit beta levels | MRPRESSO | -0.02 | 0.06 | -0.32 | 0.75 | 14.77132654 | 0.217 | 0 |
| Interleukin-20 levels | MRPRESSO | 0.01 | 0.05 | 0.15 | 0.89 | 11.92676723 | 0.391 | 0 |
| Interleukin-20 receptor subunit alpha levels | MRPRESSO | -0.09 | 0.04 | -2.01 | 0.10 | 3.001197018 | 0.856 | 0 |
| Interleukin-22 receptor subunit alpha-1 levels | MRPRESSO | -0.04 | 0.06 | -0.58 | 0.57 | 17.04622722 | 0.178 | 0 |
| Interleukin-24 levels | MRPRESSO | -0.07 | 0.06 | -1.32 | 0.22 | 10.37946489 | 0.451 | 0 |
| Interleukin-33 levels | MRPRESSO | 0.01 | 0.06 | 0.19 | 0.85 | 11.86532085 | 0.305 | 0 |
| Interleukin-4 levels | MRPRESSO | -0.09 | 0.05 | -1.79 | 0.10 | 13.93057648 | 0.351 | 0 |
| Interleukin-5 levels | MRPRESSO | -0.07 | 0.06 | -1.23 | 0.25 | 11.46362257 | 0.348 | 0 |
| Interleukin-6 levels | MRPRESSO | -0.02 | 0.03 | -0.77 | 0.48 | 2.944782454 | 0.854 | 0 |
| Interleukin-7 levels | MRPRESSO | 0.01 | 0.07 | 0.21 | 0.84 | 26.96702074 | 0.04 | 1 |
| Interleukin-7 levels | Outlier-corrected | 0.06 | 0.05 | 1.28 | 0.23 |  |  |  |
| Interleukin-8 levels | MRPRESSO | -0.02 | 0.05 | -0.41 | 0.69 | 13.07769967 | 0.581 | 0 |
| Latency-associated peptide transforming growth factor beta 1 levels | MRPRESSO | -0.01 | 0.05 | -0.16 | 0.87 | 29.47416565 | 0.095 | 0 |
| Leukemia inhibitory factor levels | MRPRESSO | 0.08 | 0.03 | 2.22 | 0.06 | 3.069419737 | 0.939 | 0 |
| Leukemia inhibitory factor receptor levels | MRPRESSO | 0.03 | 0.02 | 1.32 | 0.21 | 4.816950852 | 0.994 | 0 |
| Macrophage colony-stimulating factor 1 levels | MRPRESSO | 0.10 | 0.03 | 2.87 | 0.01 | 11.49622334 | 0.774 | 0 |
| Macrophage inflammatory protein 1a levels | MRPRESSO | 0.02 | 0.03 | 0.54 | 0.60 | 17.78253042 | 0.277 | 0 |
| Matrix metalloproteinase-1 levels | MRPRESSO | 0.00 | 0.03 | -0.10 | 0.92 | 13.70421199 | 0.616 | 0 |
| Matrix metalloproteinase-10 levels | MRPRESSO | -0.05 | 0.03 | -1.71 | 0.11 | 21.38653505 | 0.261 | 0 |
| Monocyte chemoattractant protein-2 levels | MRPRESSO | 0.01 | 0.01 | 0.98 | 0.34 | 19.00849628 | 0.84 | 0 |
| Monocyte chemoattractant protein-1 levels | MRPRESSO | 0.01 | 0.04 | 0.28 | 0.78 | 30.2088569 | 0.084 | 0 |
| Monocyte chemoattractant protein-3 levels | MRPRESSO | 0.01 | 0.03 | 0.20 | 0.84 | 25.08443405 | 0.255 | 0 |
| Monocyte chemoattractant protein-4 levels | MRPRESSO | -0.04 | 0.03 | -1.56 | 0.14 | 12.97174981 | 0.602 | 0 |
| Natural killer cell receptor 2B4 levels | MRPRESSO | -0.06 | 0.02 | -2.35 | 0.03 | 10.99561828 | 0.906 | 0 |
| Neurotrophin-3 levels | MRPRESSO | 0.07 | 0.05 | 1.34 | 0.20 | 14.25196551 | 0.502 | 0 |
| Neurturin levels | MRPRESSO | 0.02 | 0.06 | 0.38 | 0.71 | 17.63618018 | 0.175 | 0 |
| Oncostatin-M levels | MRPRESSO | 0.06 | 0.07 | 0.81 | 0.43 | 45.79643158 | <0.001 | 2 |
| Oncostatin-M levels | Outlier-corrected | 0.07 | 0.06 | 1.22 | 0.25 |  |  |  |
| Osteoprotegerin levels | MRPRESSO | 0.07 | 0.04 | 1.73 | 0.10 | 15.96733326 | 0.539 | 0 |
| Programmed cell death 1 ligand 1 levels | MRPRESSO | -0.03 | 0.04 | -0.77 | 0.45 | 16.4538547 | 0.472 | 0 |
| Protein S100-A12 levels | MRPRESSO | 0.00 | 0.05 | 0.00 | 1.00 | 23.00708587 | 0.135 | 0 |
| Signaling lymphocytic activation molecule levels | MRPRESSO | 0.01 | 0.03 | 0.29 | 0.78 | 33.12037456 | 0.195 | 0 |
| SIR2-like protein 2 levels | MRPRESSO | 0.01 | 0.04 | 0.28 | 0.79 | 4.312456935 | 0.904 | 0 |
| STAM binding protein levels | MRPRESSO | 0.08 | 0.05 | 1.46 | 0.18 | 8.764827512 | 0.607 | 0 |
| Stem cell factor levels | MRPRESSO | 0.00 | 0.03 | -0.08 | 0.94 | 54.974667 | 0.009 | 1 |
| Stem cell factor levels | Outlier-corrected | 0.01 | 0.03 | 0.37 | 0.72 |  |  |  |
| Sulfotransferase 1A1 levels | MRPRESSO | 0.04 | 0.03 | 1.28 | 0.22 | 20.27779598 | 0.47 | 0 |
| T-cell surface glycoprotein CD5 levels | MRPRESSO | -0.06 | 0.07 | -0.80 | 0.44 | 91.33838132 | <0.001 | 2 |
| T-cell surface glycoprotein CD5 levels | Outlier-corrected | 0.04 | 0.03 | 1.60 | 0.13 |  |  |  |
| T-cell surface glycoprotein CD6 isoform levels | MRPRESSO | 0.04 | 0.02 | 2.01 | 0.06 | 15.67892292 | 0.591 | 0 |
| Thymic stromal lymphopoietin levels | MRPRESSO | 0.03 | 0.06 | 0.48 | 0.64 | 16.36857773 | 0.182 | 0 |
| TNF-beta levels | MRPRESSO | 0.00 | 0.02 | -0.20 | 0.85 | 28.90782005 | 0.238 | 0 |
| TNF-related activation-induced cytokine levels | MRPRESSO | -0.04 | 0.05 | -0.81 | 0.43 | 64.13729772 | <0.001 | 1 |
| TNF-related activation-induced cytokine levels | Outlier-corrected | -0.02 | 0.03 | -0.49 | 0.63 |  |  |  |
| TNF-related apoptosis-inducing ligand levels | MRPRESSO | 0.00 | 0.02 | 0.16 | 0.87 | 30.28402136 | 0.271 | 0 |
| Transforming growth factor-alpha levels | MRPRESSO | -0.03 | 0.08 | -0.33 | 0.75 | 35.52619424 | 0.003 | 2 |
| Transforming growth factor-alpha levels | Outlier-corrected | -0.01 | 0.06 | -0.15 | 0.88 |  |  |  |
| Tumor necrosis factor levels | MRPRESSO | -0.02 | 0.06 | -0.27 | 0.79 | 26.89498597 | 0.054 | 0 |
| Tumor necrosis factor ligand superfamily member 12 levels | MRPRESSO | 0.08 | 0.04 | 1.93 | 0.07 | 36.69374333 | 0.057 | 0 |
| Tumor necrosis factor ligand superfamily member 14 levels | MRPRESSO | -0.04 | 0.03 | -1.10 | 0.28 | 35.3661607 | 0.083 | 0 |
| Tumor necrosis factor receptor superfamily member 9 levels | MRPRESSO | -0.01 | 0.04 | -0.38 | 0.71 | 25.38495831 | 0.237 | 0 |
| Urokinase-type plasminogen activator levels | MRPRESSO | -0.05 | 0.03 | -1.70 | 0.11 | 13.24929757 | 0.743 | 0 |
| Vascular endothelial growth factor A levels | MRPRESSO | 0.00 | 0.02 | 0.09 | 0.93 | 23.74846788 | 0.46 | 0 |

MR, Mendelian randomization; BCC: basal cell carcinoma; SD, standard deviation; RSSobs, observed residual sum of squares; SNP, single nucleotide polymorphism.

| **Table S6 MR estimates again for the association between Circulating Inflammatory Proteins and BCC.** | | | | | | | | | | | | |
| --- | --- | --- | --- | --- | --- | --- | --- | --- | --- | --- | --- | --- |
| exposure | MR method | Num of SNP | F-statistic | OR(95%CI) | P-value | Q-value | egger_intercept | se | pval | Q | Q_df | Q_pval |
| C-X-C motif chemokine 9 levels | Inverse variance weighted | 14 | 32.86 | 0.98(0.9-1.07) | 0.61 | 0.98 | -0.004058521 | 0.012917796 | 0.758778844 | 13.14531639 | 13 | 0.436650751 |
| C-X-C motif chemokine 9 levels | MR Egger | 14 |  | 1.01(0.81-1.26) | 0.94 | 0.63 |  |  |  |  |  |  |
| C-X-C motif chemokine 9 levels | Weighted median | 14 |  | 1.04(0.91-1.17) | 0.58 | 1.00 |  |  |  |  |  |  |
| C-X-C motif chemokine 9 levels | Maximum likelihood | 14 |  | 0.98(0.89-1.07) | 0.60 | 0.99 |  |  |  |  |  |  |
| Fms-related tyrosine kinase 3 ligand levels | Inverse variance weighted | 18 | 54.84 | 0.94(0.87-1.02) | 0.15 | 0.76 | -0.002804648 | 0.00765747 | 0.718966881 | 29.61915198 | 17 | 0.029226082 |
| Fms-related tyrosine kinase 3 ligand levels | MR Egger | 18 |  | 0.96(0.85-1.09) | 0.57 | 0.63 |  |  |  |  |  |  |
| Fms-related tyrosine kinase 3 ligand levels | Weighted median | 18 |  | 0.97(0.89-1.06) | 0.53 | 0.81 |  |  |  |  |  |  |
| Fms-related tyrosine kinase 3 ligand levels | Maximum likelihood | 18 |  | 0.94(0.89-1) | 0.06 | 0.87 |  |  |  |  |  |  |
| Interleukin-1-alpha levels | Inverse variance weighted | 8 | 22.52 | 0.92(0.82-1.04) | 0.18 | 0.73 | -0.007048183 | 0.01482547 | 0.651307595 | 3.420649152 | 7 | 0.843557389 |
| Interleukin-1-alpha levels | MR Egger | 8 |  | 0.98(0.74-1.3) | 0.89 | 0.65 |  |  |  |  |  |  |
| Interleukin-1-alpha levels | Weighted median | 8 |  | 0.89(0.77-1.03) | 0.11 | 0.83 |  |  |  |  |  |  |
| Interleukin-1-alpha levels | Maximum likelihood | 8 |  | 0.92(0.81-1.04) | 0.18 | 0.99 |  |  |  |  |  |  |

| **Table S7 Reverse MR estimates for the association between Circulating Inflammatory Proteins and BCC** | | | | | | | | |
| --- | --- | --- | --- | --- | --- | --- | --- | --- |
| **outcome** | | **MR method** | **Num of SNP** | | **OR(95%CI)** | | | **P-value** |
| C-C motif chemokine 28 levels | | Inverse variance weighted | 53 | | 1(0.97-1.03) | | | 0.79 |
| C-C motif chemokine 28 levels | | MR Egger | 53 | | 0.99(0.93-1.06) | | | 0.80 |
| C-C motif chemokine 28 levels | | Weighted median | 53 | | 1(0.95-1.04) | | | 0.90 |
| C-C motif chemokine 28 levels | | Maximum likelihood | 53 | | 1(0.97-1.03) | | | 0.79 |
| C-C motif chemokine 4 levels | | Inverse variance weighted | 53 | | 1.02(0.98-1.05) | | | 0.36 |
| C-C motif chemokine 4 levels | | MR Egger | 53 | | 1(0.92-1.09) | | | 0.95 |
| C-C motif chemokine 4 levels | | Weighted median | 53 | | 1.02(0.97-1.07) | | | 0.38 |
| C-C motif chemokine 4 levels | | Maximum likelihood | 53 | | 1.02(0.99-1.05) | | | 0.30 |
| Macrophage colony-stimulating factor 1 levels | | Inverse variance weighted | 53 | | 1(0.97-1.04) | | | 0.86 |
| Macrophage colony-stimulating factor 1 levels | | MR Egger | 53 | | 1.06(0.97-1.15) | | | 0.18 |
| Macrophage colony-stimulating factor 1 levels | | Weighted median | 53 | | 1(0.96-1.05) | | | 0.99 |
| Macrophage colony-stimulating factor 1 levels | | Maximum likelihood | 53 | | 1(0.97-1.04) | | | 0.82 |
| Fractalkine levels | | Inverse variance weighted | 53 | | 0.99(0.95-1.03) | | | 0.57 |
| Fractalkine levels | | MR Egger | 53 | | 1.03(0.94-1.12) | | | 0.56 |
| Fractalkine levels | | Weighted median | 53 | | 1.01(0.96-1.05) | | | 0.77 |
| Fractalkine levels | | Maximum likelihood | 53 | | 0.99(0.96-1.02) | | | 0.47 |
| Interleukin-17A levels | | Inverse variance weighted | 53 | | 1.02(0.98-1.06) | | | 0.27 |
| Interleukin-17A levels | | MR Egger | 53 | | 1.02(0.94-1.1) | | | 0.70 |
| Interleukin-17A levels | | Weighted median | 53 | | 1.03(0.97-1.08) | | | 0.33 |
| Interleukin-17A levels | | Maximum likelihood | 53 | | 1.02(0.98-1.06) | | | 0.27 |
| Interleukin-18 levels | | Inverse variance weighted | 53 | | 1.01(0.98-1.05) | | | 0.55 |
| Interleukin-18 levels | | MR Egger | 53 | | 1.03(0.95-1.11) | | | 0.55 |
| Interleukin-18 levels | | Weighted median | 53 | | 1.02(0.97-1.07) | | | 0.39 |
| Interleukin-18 levels | | Maximum likelihood | 53 | | 1.01(0.98-1.04) | | | 0.50 |
| **Table S8 The heterogeneity of BCC instrumental variables.** | | | | | | | | |
| **exposure** | **outcome** | | | **Cochran's Q** | | **df** | **P-value** | |
| BCC | C-C motif chemokine 28 levels | | | 50.18 | | 52 | 0.55 | |
| BCC | C-C motif chemokine 4 levels | | | 65.80 | | 52 | 0.09 | |
| BCC | Macrophage colony-stimulating factor 1 levels | | | 78.24 | | 52 | 0.01 | |
| BCC | Fractalkine levels | | | 82.81 | | 52 | 0.00 | |
| BCC | Interleukin-17A levels | | | 53.60 | | 52 | 0.41 | |
| BCC | Interleukin-18 levels | | | 65.90 | | 52 | 0.09 | |

| **Table S9 Directional horizontal pleiotropy assessed by intercept term in MR Egger regression of the association between BCC and Circulating Inflammatory Proteins.** | | | | |
| --- | --- | --- | --- | --- |
| **exposure** | **outcome** | **Egger_intercept** | **SE** | **P-value** |
| BCC | C-C motif chemokine 28 levels | 0.001 | 0.004 | 0.880 |
| BCC | C-C motif chemokine 4 levels | 0.002 | 0.005 | 0.703 |
| BCC | Macrophage colony-stimulating factor 1 levels | -0.007 | 0.005 | 0.160 |
| BCC | Fractalkine levels | -0.005 | 0.005 | 0.350 |
| BCC | Interleukin-17A levels | 0.001 | 0.005 | 0.913 |
| BCC | Interleukin-18 levels | -0.002 | 0.005 | 0.702 |
|  |  |  |  |  |

| **Table S10 MR-PRESSO analysis for the association between Circulating Inflammatory Proteins and BCC.** | | | | | | | | | |
| --- | --- | --- | --- | --- | --- | --- | --- | --- | --- |
| **exposure** | **exposure** | **MR Analysis** | **Causal Estimate** | **Sd** | **T-stat** | **P-value** | **Rossbs** | **Global test P-value** | **Remove SNP** |
| BCC | C-C motif chemokine 28 levels | MRPRESSO | 0.00 | 0.02 | -0.27 | 0.787 | 51.902 | 0.564 | - |
| BCC | C-C motif chemokine 4 levels | MRPRESSO | 0.02 | 0.02 | 0.91 | 0.367 | 68.497 | 0.094 | - |
| BCC | Macrophage colony-stimulating factor 1 levels | MRPRESSO | 0.00 | 0.02 | 0.18 | 0.857 | 80.648 | 0.013 | 1 |
| BCC | Macrophage colony-stimulating factor 1 levels | Outlier-corrected | 0.01 | 0.02 | 0.49 | 0.630 |  |  |  |
| BCC | Fractalkine levels | MRPRESSO | -0.01 | 0.02 | -0.57 | 0.569 | 85.509 | 0.005 | 1 |
| BCC | Fractalkine levels | Outlier-corrected | -0.01 | 0.02 | -0.32 | 0.752 |  |  |  |
| BCC | Interleukin-17A levels | MRPRESSO | 0.02 | 0.02 | 1.09 | 0.280 | 55.546 | 0.433 | - |
| BCC | Interleukin-18 levels | MRPRESSO | 0.01 | 0.02 | 0.59 | 0.557 | 68.325 | 0.082 | - |
|  |  |  |  |  |  |  |  |  |  |

| **Table S11 MR estimates again for the association between Circulating Inflammatory Proteins and BCC.** | | | | | | | | | | | |
| --- | --- | --- | --- | --- | --- | --- | --- | --- | --- | --- | --- |
| **outcome** | **exposure** | **MR method** | **Num of SNP** | **OR(95%CI)** | **P-value** | **egger_intercept** | **se** | **pval** | **Q** | **Q_df** | **Q_pval** |
| Macrophage colony-stimulating factor 1 levels | BCC | Inverse variance weighted | 52 | 1.01(0.97-1.04) | 0.62765669 | -0.005 | 0.005 | 0.34 | 64.47 | 51 | 0.097 |
| Macrophage colony-stimulating factor 1 levels | BCC | MR Egger | 52 | 1.04(0.97-1.13) | 0.288688864 |  |  |  |  |  |  |
| Macrophage colony-stimulating factor 1 levels | BCC | Weighted median | 52 | 1(0.96-1.04) | 0.987735381 |  |  |  |  |  |  |
| Macrophage colony-stimulating factor 1 levels | BCC | Maximum likelihood | 52 | 1.01(0.98-1.04) | 0.586170993 |  |  |  |  |  |  |
| Fractalkine levels | BCC | Inverse variance weighted | 52 | 0.99(0.96-1.03) | 0.750310888 | -0.004 | 0.005 | 0.43 | 70.17 | 51 | 0.039 |
| Fractalkine levels | BCC | MR Egger | 52 | 1.02(0.94-1.11) | 0.577410508 |  |  |  |  |  |  |
| Fractalkine levels | BCC | Weighted median | 52 | 1.01(0.96-1.06) | 0.770133489 |  |  |  |  |  |  |
| Fractalkine levels | BCC | Maximum likelihood | 52 | 0.99(0.96-1.03) | 0.70891505 |  |  |  |  |  |  |
|  |  |  |  |  |  |  |  |  |  |  |  |
